# Supplementary material for: Planar chiral [2.2]paracyclophane-based bis(thiourea) catalyst: application to asymmetric Henry reaction
Source: Royal Society of Chemistry journal article supplement (doi:10.1039/c3cc41789a), 2013-01-01
Supplement: c3cc41789a.pdf [file c3cc41789a.pdf]

## Supplementary Information

### **Planar Chiral [2.2]Paracyclophane-based Bis(thiourea) Catalyst: Application to Asymmetric Henry Reaction**

Shinji Kitagaki,<sup>\*†</sup> Takahiro Ueda, Chisato Mukai

*Division of Pharmaceutical Sciences, Graduate School of Medical Sciences, Kanazawa University*

*Kakuma-machi, Kanazawa, 920-1192, Japan*

*† Current address: Faculty of Pharmacy, Meijo University, 150 Yagotoyama, Tempaku-ku, Nagoya 468-8503, Japan.*

**Table of Contents.**

|                                              |     |
|----------------------------------------------|-----|
| Title of Manuscript and Author List          | S1  |
| Table of Contents                            | S2  |
| Experimental Details                         | S3  |
| $^1\text{H}$ and $^{13}\text{C}$ NMR spectra | S14 |
| HPLC data                                    | S50 |

**General Experimental Details.** Melting points were measured with YANAGIMOTO micro melting point apparatus, and were uncorrected. Optical rotations were measured on a JASCO P-2200. IR spectra were measured with a SHIMADZU FTIR-8700 spectrometer for samples in  $\text{CHCl}_3$ .  $^1\text{H}$  NMR spectra were measured with a JEOL JNM-ECS400 or JNM-ECA600 spectrometers for samples in  $\text{CDCl}_3$ . Tetramethylsilane (0.00 ppm) was used as an internal standard.  $^{13}\text{C}$  NMR spectra were measured with JNM-ECS400 or JNM-ECA600 spectrometers for samples in  $\text{CDCl}_3$ .  $\text{CDCl}_3$  (77.00 ppm) was used as an internal standard. High resolution mass spectra were measured in direct analysis in real time with TOF analyzer, a JEOL JMS-T100TD, or JMS-SX102A. Commercially available reagents were used throughout without purification unless otherwise stated. *i*- $\text{Pr}_2\text{NEt}$  was distilled from calcium hydride under a nitrogen atmosphere. Silica gel (silica gel 60N, 40-50 mm, Kanto Chemical) was used for chromatography. All reactions were carried out under a nitrogen atmosphere unless otherwise stated. Organic extracts were dried over anhydrous  $\text{Na}_2\text{SO}_4$ . Experimental details and the spectroscopic data of compounds **2** and **13** have been described in reference 1. Bromocyclophane ( $R_p$ )-**7** was prepared according to Rozenberg's procedure.<sup>2</sup>

**( $R_p$ )-(-)-4,12-Bis[(*N*-*tert*-butoxycarbonyl)amino][2.2]-paracyclophane [( $R_p$ )-**3**].**

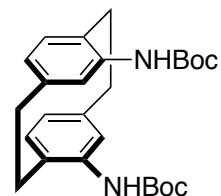

To an oven-dried screw cap tube equipped with a magnetic stirring bar were added ( $R_p$ )-**2** (20.0 mg,  $4.59 \times 10^{-2}$  mmol), *N*-*tert*-butyl carbamate (32.3 mg, 0.275 mmol), JohnPhos (2.7 mg,  $9.2 \times 10^{-3}$  mmol),  $\text{Pd}_2(\text{dba})_3$  (4.2 mg,  $4.6 \times 10^{-3}$  mmol),  $\text{NaOPh}$  (15.7 mg, 0.135 mmol) and toluene (0.1 mL). After flushing with argon, the tube was capped and stirred for 18 h at 85 °C. The reaction mixture was cooled, diluted with  $\text{CH}_2\text{Cl}_2$ , quenched by addition of saturated aqueous  $\text{NaHCO}_3$ , and extracted with  $\text{CH}_2\text{Cl}_2$ . The extract was washed with brine, dried and concentrated to dryness. The residue was chromatographed with hexane-EtOAc (20:1) to afford ( $R_p$ )-**3** as a white solid (12.6 mg, 63%). Mp 187-188 °C;  $[\alpha]_D^{26} -36.2$  (*c* 1.00,  $\text{CHCl}_3$ ); IR  $\nu_{\text{max}}/\text{cm}^{-1}$  3441, 3335, 1715, 1516;  $^1\text{H}$  NMR (600 MHz)  $\delta$  7.06 (brs, 1H), 6.71 (brs, 1H), 6.48 (d, *J* = 7.9 Hz, 2H), 6.35 (dd, *J* = 7.9, 1.7 Hz, 2H), 3.31-3.27 (m, 2H), 3.04 (dd, *J* = 11.5, 11.2 Hz, 2H), 2.96-2.91 (m, 2H), 2.75-2.71 (m, 2H), 1.55 (s, 18H);  $^{13}\text{C}$  NMR (150 MHz, 55 °C)  $\delta$  153.7, 140.6, 136.7, 135.3, 132.0, 129.2, 123.1, 80.1, 33.4, 33.1, 28.5; MS (DART) *m/z* 439 (32.3,  $\text{M}^+ + 1$ ); HRMS (DART) calcd for  $\text{C}_{26}\text{H}_{35}\text{N}_2\text{O}_4$  439.2597, found 439.2599.

**(*R*<sub>p</sub>)-(+)-4,12-Diamino[2.2]paracyclophane [(*R*<sub>p</sub>)-4].<sup>3</sup>**

To a solution of (*R*<sub>p</sub>)-3 (43.6 mg, 9.95 x 10<sup>-2</sup> mmol) in CH<sub>2</sub>Cl<sub>2</sub> (1.0 mL) was added TFA (0.08 mL, 1 mmol) at room temperature. The reaction mixture was stirred for 26 h, quenched by addition of saturated aqueous NaHCO<sub>3</sub>, and extracted with CH<sub>2</sub>Cl<sub>2</sub>. The extract was washed with water

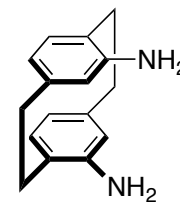

and brine, dried and concentrated to dryness. The residue was chromatographed with hexane-EtOAc (2:1) to afford (*R*<sub>p</sub>)-4 (21.7 mg, 92%) as a brown solid. Mp 189-191 °C; [α]<sub>D</sub><sup>28</sup> +95.4 (*c* 1.00, CHCl<sub>3</sub>); IR ν<sub>max</sub>/cm<sup>-1</sup> 3468, 3387, 1616; <sup>1</sup>H NMR (600 MHz) δ 6.35 (d, *J* = 7.6 Hz, 2H), 6.19 (d, *J* = 1.4 Hz, 2H), 6.04 (dd, *J* = 7.6, 1.4 Hz, 2H), 3.37 (brs, 4H), 3.05-3.01 (m, 2H), 2.92-2.89 (m, 4H), 2.64-2.59 (m, 2H); <sup>13</sup>C NMR (150 MHz) δ 144.5, 141.1, 135.1, 124.0, 123.0, 116.3, 32.7, 32.0; MS (DART) *m/z* 239 (57.9, M<sup>+</sup>+1); HRMS (DART) calcd for C<sub>16</sub>H<sub>19</sub>N<sub>2</sub> 239.1548, found 239.1545.

**(*R*<sub>p</sub>)-(-)-4,12-Bis{*N*'-[3,5-bis(trifluoromethyl)phenyl]thioureido}-[2.2]paracyclophane [(*R*<sub>p</sub>)-1].**

To a solution of (*R*<sub>p</sub>)-3 (21.7 mg, 9.11 x 10<sup>-2</sup> mmol) in THF (1.8 mL) was added 3,5-bis(trifluoromethyl)phenyl isothiocyanate (0.16 mL, 0.91 mmol) at 0 °C. The reaction mixture was stirred for 1 d at the same temperature and concentrated to dryness. The residue was chromatographed with hexane-EtOAc (6:1) to afford (*R*<sub>p</sub>)-1 (52.4 mg, 74%) as a white solid. Mp 129-130 °C; [α]<sub>D</sub><sup>26</sup> -26.3 (*c* 1.00, CHCl<sub>3</sub>);

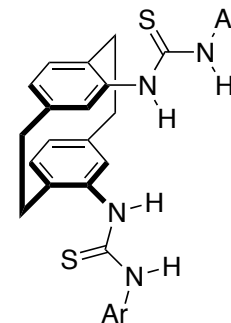

Ar=3,5-(CF<sub>3</sub>)<sub>2</sub>C<sub>6</sub>H<sub>3</sub>  
IR ν<sub>max</sub>/cm<sup>-1</sup> 3342, 1529, 1279, 1182, 1142; <sup>1</sup>H NMR (600 MHz) δ 9.20 (brs, 2H), 8.13 (brs, 2H), 7.89 (s, 4H), 7.64 (s, 2H), 6.71 (d, *J* = 7.3 Hz, 4H), 6.64 (d, *J* = 7.3 Hz, 2H), 3.35-3.30 (m, 2H), 3.19-3.03 (m, 4H), 2.92-2.84 (m, 2H); <sup>13</sup>C NMR (150 MHz) δ 178.8, 142.6, 139.1, 136.6, 135.0, 134.7, 133.0, 132.2 (q, *J*<sub>C-F</sub> = 33.5 Hz), 125.3, 124.7, 123.7 (q, *J*<sub>C-F</sub> = 272.7 Hz), 119.6, 33.6, 33.1; MS (EI) *m/z* 781 (63.5, M<sup>+</sup>); HRMS calcd for C<sub>34</sub>H<sub>25</sub>F<sub>12</sub>N<sub>4</sub>S<sub>2</sub> 781.1329, found 781.1321.

**(*R*<sub>p</sub>)-(-)-*N*-[12-(*N*-*tert*-Butoxycarbonyl)amino[2.2]paracyclophan-4-yl]-*N*'-[3,5-bis(trifluoromethyl)phenyl]thiourea [(*R*<sub>p</sub>)-8].**

To a solution of (*R*<sub>p</sub>)-3 (30.0 mg, 6.84 x 10<sup>-2</sup> mmol) in CH<sub>2</sub>Cl<sub>2</sub> (0.7 mL) was added TFA (0.01 mL, 0.3 mmol) at room temperature. The reaction mixture was stirred for 2.5 h, quenched by addition of

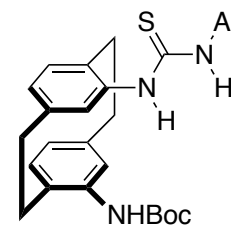

saturated aqueous  $\text{NaHCO}_3$ , and extracted with  $\text{CH}_2\text{Cl}_2$ . The extract was washed with water and brine, dried, and concentrated to dryness. The residue was chromatographed with hexane-EtOAc (6:1) to afford ( $R_p$ )-(-)-12-amino-4-(*N*-*tert*-butoxycarbonyl)amino[2.2]-paracyclophane (16.8 mg, 73%) as a white solid. Mp 157-159 °C;  $[\alpha]_D^{27}$   $-90.3$  ( $c$  0.90,  $\text{CHCl}_3$ ); IR  $\nu_{\text{max}}/\text{cm}^{-1}$  3443, 3348, 1720, 1518;  $^1\text{H}$  NMR (600 MHz)  $\delta$  7.54 (s, 1H), 6.49 (d,  $J = 7.7$  Hz, 1H), 6.32 (d,  $J = 7.7$  Hz, 1H), 6.26 (dd,  $J = 7.7, 1.7$  Hz, 2H), 6.06 (dd,  $J = 7.7, 1.7$  Hz, 1H), 5.75 (d,  $J = 1.7$  Hz, 1H), 3.86 (brs, 2H), 3.19-3.12 (m, 2H) 3.08-3.04 (m, 2H), 2.99 (dd,  $J = 12.0, 11.2$  Hz, 1H), 2.84-2.79 (m, 1H), 2.73-2.61 (m, 2H), 1.56 (s, 9H);  $^{13}\text{C}$  NMR (150 MHz, 55 °C)  $\delta$  153.4, 146.4, 140.9, 140.5, 136.7, 135.6, 134.9, 128.4, 124.2, 122.6, 119.1, 118.7, 80.4, 33.4, 32.6, 32.3, 28.4; MS (DART)  $m/z$  339 (14.25,  $\text{M}^+ + 1$ ); HRMS (DART) calcd for  $\text{C}_{21}\text{H}_{27}\text{N}_2\text{O}_2$  339.2073, found 339.2078.

To a solution of the above amine (5.6 mg,  $1.7 \times 10^{-2}$  mmol) in THF (0.4 mL) was added 3,5-bis(trifluoromethyl)phenyl isothiocyanate (9.0  $\mu\text{L}$ ,  $4.9 \times 10^{-2}$  mmol) at 0 °C. The reaction mixture was stirred for 11.5 h at room temperature and concentrated to dryness. The residue was chromatographed with hexane-acetone (5:1) to afford ( $R_p$ )-**8** (8.5 mg, 82%) as a white solid. Mp 105-107 °C;  $[\alpha]_D^{26}$   $-63.5$  ( $c$  0.83,  $\text{CHCl}_3$ ); IR  $\nu_{\text{max}}/\text{cm}^{-1}$  3439, 3344, 1715, 1518, 1279, 1180, 1143;  $^1\text{H}$  NMR (600 MHz, 55 °C)  $\delta$  9.47 (s, 1H), 8.00 (s, 2H), 7.74 (s, 1H), 7.62, (s, 1H), 7.34 (s, 1H), 6.65 (d,  $J = 7.9$  Hz, 2H), 6.55 (d,  $J = 7.9$  Hz, 1H), 6.50 (d,  $J = 7.9$  Hz, 1H), 6.39 (dd,  $J = 7.9, 1.4$  Hz, 1H), 6.29 (d,  $J = 8.2$  Hz, 2H), 3.37-3.33 (m, 1H), 3.22 (dd,  $J = 14.1, 10.0$  Hz, 1H), 3.15-3.06 (m, 3H), 3.02-2.97 (m, 1H), 2.87-2.78 (m, 2H), 1.57 (s, 9H);  $^{13}\text{C}$  NMR (150 MHz,  $\text{DMSO-}d_6$ , 60 °C)  $\delta$  179.6, 153.2, 141.7, 140.6, 139.8, 136.5, 136.3, 135.9, 135.1, 133.0, 131.0, 129.9 (q,  $J_{\text{C-F}} = 32.6$  Hz), 128.7, 125.2, 123.3, 123.0 (q,  $J_{\text{C-F}} = 272.7$  Hz), 122.4, 116.7, 78.9, 33.2, 32.9, 32.3, 28.0; MS (DART)  $m/z$  610 (100.0,  $\text{M}^+ + 1$ ); HRMS (DART) calcd for  $\text{C}_{30}\text{H}_{30}\text{F}_6\text{N}_3\text{O}_2\text{S}$  610.1963, found 610.1948.

**( $R_p$ )-(-)-*N*-(12-Amino[2.2]paracyclophan-4-yl)-*N'*-[3,5-bis-(trifluoromethyl)phenyl]thiourea [( $R_p$ )-**9**].**

To a solution of ( $R_p$ )-**4** (10.0 mg,  $4.20 \times 10^{-2}$  mmol) in  $\text{CH}_2\text{Cl}_2$  (0.4 mL) was added 3,5-bis(trifluoromethyl)phenyl isothiocyanate (9.0  $\mu\text{L}$ ,  $4.9 \times 10^{-2}$  mmol) at 0 °C. The reaction mixture was stirred for 2.5 h at

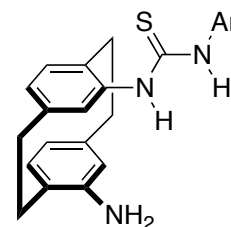

room temperature and concentrated to dryness. The residue was chromatographed with hexane-EtOAc (4:1) to afford ( $R_p$ )-**9** (17.5 mg, 78%) as a white solid. Mp 99-101 °C;  $[\alpha]_D^{26}$

–57.1 (*c* 1.00, CHCl<sub>3</sub>); IR  $\nu_{\max}/\text{cm}^{-1}$  3394, 3339, 1620, 1279, 1182, 1142; <sup>1</sup>H NMR (600 MHz)  $\delta$  8.35 (s, 1H), 7.97 (s, 2H), 7.92 (s, 1H), 7.68 (s, 1H), 7.01 (s, 1H), 6.74 (dd, *J* = 7.9 Hz, 1H), 6.55 (dd, *J* = 7.9, 1.5 Hz, 1H), 6.38 (d, *J* = 7.7 Hz, 1H), 6.16 (dd, *J* = 7.7, 1.7 Hz, 1H), 5.86 (d, *J* = 1.7 Hz, 1H), 3.66 (brs, 2H), 3.21–3.16 (m, 1H), 3.13–3.05 (m, 3H), 2.99–2.92 (m, 2H), 2.85–2.80 (m, 1H), 2.74–2.67 (m, 1H); <sup>13</sup>C NMR (150 MHz)  $\delta$  179.3, 145.3, 142.9, 140.9, 139.7, 135.8, 135.3, 134.7, 133.9, 133.6, 131.8 (q, *J*<sub>C-F</sub> = 34.0 Hz), 125.0, 124.4, 124.4, 122.9 (q, *J*<sub>C-F</sub> = 273.1 Hz), 122.6, 119.4, 117.2, 34.0, 32.6, 32.1, 31.9; MS (DART) *m/z* 510 (37.2, M<sup>+</sup>+1); HRMS (DART) calcd for C<sub>25</sub>H<sub>22</sub>F<sub>6</sub>N<sub>3</sub>S 510.1439, found 510.1426.

**(*R*<sub>p</sub>)-(-)-*N*-(12-Hydroxy[2.2]paracyclophan-4-yl)-*N'*-[3,5-bis-(trifluoromethyl)phenyl]thiourea [(*R*<sub>p</sub>)-**10**].<sup>4</sup>**

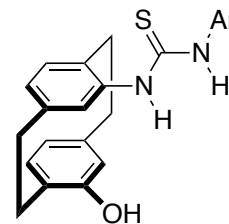

To an oven-dried screw cap tube equipped with a magnetic stirring bar were added (*R*<sub>p</sub>)-4-bromo-12-hydroxy[2.2]paracyclophane (20.0 mg, 6.60 x 10<sup>-2</sup> mmol), *N*-*tert*-butyl carbamate (9.3 mg, 7.9 x 10<sup>-2</sup> mmol), JohnPhos (3.9 mg, 1.3 x 10<sup>-2</sup> mmol), Pd<sub>2</sub>(dba)<sub>3</sub> (6.0 mg, 6.6 x 10<sup>-3</sup> mmol), NaOPh (11.5 mg, 9.91 x 10<sup>-2</sup> mmol), and toluene (0.15 mL). After flushing with argon, the tube was capped and stirred for 18 h at 85 °C. The reaction mixture was cooled, diluted with CH<sub>2</sub>Cl<sub>2</sub>, quenched by addition of saturated aqueous NaHCO<sub>3</sub>, and extracted with CH<sub>2</sub>Cl<sub>2</sub>. The extract was washed with 10% aqueous NaOH, water and brine, dried and concentrated to dryness. The residue was chromatographed with hexane-EtOAc (20:1) to afford (*R*<sub>p</sub>)-12-(*N*-*tert*-butoxycarbonyl)amino-4-hydroxy[2.2]paracyclophane (13.7 mg, 61%) as a white solid.

To a solution of the above carbamate (13.7 mg, 4.04 x 10<sup>-2</sup> mmol) in CH<sub>2</sub>Cl<sub>2</sub> (0.4 mL) was added TFA (0.03 mL, 0.39 mmol) at room temperature. The reaction mixture was stirred for 18 h, quenched by addition of saturated aqueous NaHCO<sub>3</sub>, and extracted with CH<sub>2</sub>Cl<sub>2</sub>. The extract was washed with water and brine, dried and concentrated to leave the crude (*R*<sub>p</sub>)-12-amino-4-hydroxy[2.2]paracyclophane (9.2 mg) as a yellow solid. To a solution of the crude amine in CH<sub>2</sub>Cl<sub>2</sub> (0.75 mL) was added 3,5-bis(trifluoromethyl)phenyl isothiocyanate (20 μL, 0.11 mmol) at 0 °C. The reaction mixture was stirred for 18 h at room temperature and concentrated to dryness. The residue was chromatographed with hexane-EtOAc (10:1) to afford (*R*<sub>p</sub>)-**10** (14.4 mg, 70% for 2 steps) as a white solid. Mp 124–126 °C; [α]<sub>D</sub><sup>23</sup> –32.1 (*c* 0.20, toluene) [lit.,<sup>4</sup> [α]<sub>D</sub><sup>20</sup> +35.2 (*c* 0.75, toluene) for (*S*<sub>p</sub>)-**10**];

$^1\text{H}$  NMR (600 MHz)  $\delta$  10.03 (s, 1H), 7.99 (s, 1H), 7.89 (d,  $J = 7.8$  Hz, 2H), 7.75 (s, 1H), 6.84 (dd,  $J = 16.0, 1.4$  Hz, 1H), 6.70 (d,  $J = 7.8$  Hz, 2H), 6.54 (d,  $J = 7.8$  Hz, 1H), 6.49 (d,  $J = 7.8$  Hz, 1H), 6.28 (dd,  $J = 7.8, 1.6$  Hz, 2H), 5.99 (dd,  $J = 21.2, 1.6$  Hz, 1H), 3.41-3.35 (m, 1H), 3.27-3.20 (m, 1H), 3.12-2.98 (m, 4H), 2.94-2.86 (m, 1H), 2.64-2.56 (m, 1H).

***(R<sub>p</sub>)-(+)-N*-{12-(3,5-Dimethoxyphenyl)[2.2]paracyclophan-4-yl}-*N'*-[3,5-bis(trifluoromethyl)phenyl]thiourea [(*R<sub>p</sub>*)-11].**

To a solution of (*R<sub>p</sub>*)-4-amino-12-(3,5-dimethoxyphenyl)[2.2]-paracyclophane<sup>1</sup> (5.5 mg,  $1.3 \times 10^{-2}$  mmol) in THF (0.3 mL) was added 3,5-bis(trifluoromethyl)phenyl isothiocyanate (8.0  $\mu\text{L}$ ,  $4.1 \times 10^{-2}$  mmol) at 0 °C. The reaction mixture was stirred for 41 h at room temperature and concentrated to dryness. The residue was

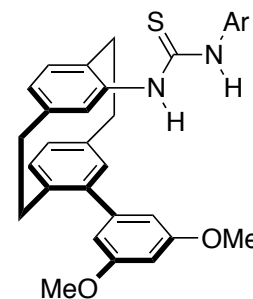

chromatographed on alumina with hexane-EtOAc (10:1) to afford (*R<sub>p</sub>*)-11 (5.4 mg, 66%) as a white solid. Mp 80-82 °C;  $[\alpha]_{\text{D}}^{20} +135.7$  ( $c$  0.48,  $\text{CHCl}_3$ ); IR  $\nu_{\text{max}}/\text{cm}^{-1}$  3402, 3348, 1278, 1182, 1142;  $^1\text{H}$  NMR (600 MHz)  $\delta$  7.97 (s, 2H), 7.66 (s, 1H), 7.62 (s, 1H), 7.58 (s, 1H), 6.96 (d,  $J = 1.7$  Hz, 1H), 6.81 (d,  $J = 7.9$  Hz, 1H), 6.77 (dd,  $J = 7.9, 1.7$  Hz, 1H), 6.69 (d,  $J = 7.9$  Hz, 1H), 6.56 (d,  $J = 2.2$  Hz, 2H), 6.52-6.49 (m, 2H), 6.42 (d,  $J = 1.4$  Hz, 1H), 3.90 (s, 6H), 3.59-3.53 (m, 1H), 3.39-3.35 (m, 1H), 3.32-3.28 (m, 1H), 3.10 (ddd,  $J = 13.4, 10.0, 6.9$  Hz, 1H), 2.99-2.89 (m, 3H), 2.70-2.65 (m, 1H);  $^{13}\text{C}$  NMR (150 MHz)  $\delta$  179.2, 161.1, 143.4, 142.2, 141.8, 139.7, 139.1, 136.9, 136.3, 136.0, 135.4, 133.4, 133.0, 132.7, 131.8 (q,  $J_{\text{C-F}} = 34.0$  Hz), 128.3, 127.4, 124.4, 122.4 (q,  $J_{\text{C-F}} = 273.1$  Hz), 119.3, 107.2, 99.5, 55.6, 34.0, 33.9, 33.3, 32.6; MS (EI) 630 (15.3,  $\text{M}^+$ ); HRMS (EI) calcd for  $\text{C}_{33}\text{H}_{28}\text{F}_6\text{N}_2\text{O}_2\text{S}$  630.1776, found 630.1778.

**Typical Procedure for Henry Reaction (Table 2, Entry 1).**

To a solution of aldehyde **5a** (15.1 mg, 0.100 mmol), (*R<sub>p</sub>*)-**1** (3.9 mg, 5.0 × 10<sup>-3</sup> mmol) and *i*-Pr<sub>2</sub>N<sub>2</sub>Et (3.4 μL, 2.0 × 10<sup>-2</sup> mmol) in THF (0.1 mL) was added nitromethane (**6a**) (54 μL, 1.0 mmol) at -25 °C. After being stirred for 3 h at the same temperature, the reaction mixture was quenched by addition of saturated aqueous NH<sub>4</sub>Cl and extracted with EtOAc. The extract was washed with brine, dried and concentrated to dryness. The residue was purified by flash chromatography on silica gel with hexane-EtOAc (3:1) to afford **7a** (17.8 mg, 84%) as a yellow solid.

**(*R*)-2-Nitro-1-(4-nitrophenyl)ethanol (7a).**

[α]<sub>D</sub><sup>27</sup> -31.1 (*c* 0.87, CHCl<sub>3</sub>) {lit.,<sup>5</sup> [α]<sub>D</sub><sup>24</sup> -30.4 (*c* 0.53, CHCl<sub>3</sub>) for 88% ee}; <sup>1</sup>H NMR (600 MHz) δ 8.28-8.26 (m, 2H), 7.65-7.62 (m, 2H), 5.63-5.60 (m, 1H), 4.63-4.56 (m, 2H), 3.18 (d, *J* = 4.0 Hz, 1H); <sup>13</sup>C NMR (150 MHz) δ 148.1, 144.9, 126.9, 124.2, 80.6, 69.9; HPLC: OD-H column; λ = 254 nm; eluent: hexane/isopropanol = 85/15; flow rate: 0.8 mL/min; *t<sub>R</sub>* = 22.3 min (major), *t<sub>R</sub>* = 28.0 min (minor); ee = 97%.

**(*R*)-1-(4-Chlorophenyl)-2-nitroethanol (7b).**

[α]<sub>D</sub><sup>26</sup> -41.6 (*c* 0.32, CHCl<sub>3</sub>) {lit.,<sup>5</sup> [α]<sub>D</sub><sup>22</sup> -38.8 (*c* 0.55, CHCl<sub>3</sub>) for 90% ee}; <sup>1</sup>H NMR (600 MHz) δ 7.39-7.35 (m, 4H), 5.46 (dd, *J* = 9.5, 2.9 Hz, 1H), 4.57 (dd, *J* = 13.4, 9.5 Hz, 1H), 4.51 (dd, *J* = 13.4, 2.9 Hz, 1H), 2.90 (s, 1H); <sup>13</sup>C NMR (150 MHz) δ 136.5, 134.9, 129.2, 127.3, 80.9, 70.3; HPLC: OD-H column; λ = 254 nm; eluent: hexane/isopropanol = 85/15; flow rate: 0.8 mL/min; *t<sub>R</sub>* = 12.8 min (major), *t<sub>R</sub>* = 15.7 min (minor); ee = 95%.

**(*R*)-2-Nitro-1-phenylethanol (7c).**

[α]<sub>D</sub><sup>26</sup> -33.3 (*c* 0.26, CHCl<sub>3</sub>) {lit.,<sup>6</sup> [α]<sub>D</sub><sup>23</sup> -37.0 (*c* 3.55, CHCl<sub>3</sub>) for 87% ee}; <sup>1</sup>H NMR (600 MHz) δ 7.44-7.35 (m, 5H), 5.47 (dt, *J* = 9.6, 2.9 Hz, 1H), 4.61 (dd, *J* = 13.4, 3.6 Hz, 1H), 4.52 (dd, *J* = 13.4, 2.9 Hz, 1H), 2.83 (d, *J* = 3.3 Hz, 1H); <sup>13</sup>C NMR (150 MHz) δ 138.0, 129.0, 129.0, 125.9, 81.2, 71.0; HPLC: OD-H column; λ = 254 nm; eluent: hexane/isopropanol = 85/15; flow rate: 0.8 mL/min; *t<sub>R</sub>* = 14.0 min (major), *t<sub>R</sub>* = 17.4 min (minor); ee = 90%.



**(R)-1-(4-Methoxyphenyl)-2-nitroethanol (7d).**

$[\alpha]_{\text{D}}^{26}$   $-34.4$  (*c* 0.65,  $\text{CHCl}_3$ ) {lit.,<sup>6</sup>  $[\alpha]_{\text{D}}^{23}$   $-35.5$  (*c* 4.70,  $\text{CHCl}_3$ ) for 76% ee};  $^1\text{H}$  NMR (600 MHz)  $\delta$  7.33-7.31 (m, 2H), 6.94-6.91 (m, 2H), 5.41 (d,  $J = 9.8$  Hz, 1H), 4.60 (dd,  $J = 13.2$ , 9.8 Hz, 1H), 4.50 (dd,  $J = 13.2$ , 3.1 Hz, 1H), 3.81 (s, 3H), 2.71 (d,  $J = 2.6$  Hz, 1H);  $^{13}\text{C}$  NMR (150 MHz)  $\delta$  160.0, 130.0, 127.2, 114.4, 81.2, 71.0, 55.3; HPLC: OD-H column;  $\lambda = 254$  nm; eluent: hexane/isopropanol = 85/15; flow rate: 0.8 mL/min;  $t_{\text{R}} = 18.2$  min (major),  $t_{\text{R}} = 22.1$  min (minor); ee = 86%.

**(R)-2-Nitro-1-(3-nitrophenyl)ethanol (7e).**

$[\alpha]_{\text{D}}^{26}$   $-27.4$  (*c* 0.87,  $\text{CH}_2\text{Cl}_2$ ) {lit.,<sup>7</sup>  $[\alpha]_{\text{D}}^{24}$   $-27.4$  (*c* 1.74,  $\text{CH}_2\text{Cl}_2$ ) for 89% ee};  $^1\text{H}$  NMR (600 MHz)  $\delta$  8.33 (t,  $J = 1.7$  Hz, 1H), 8.24-8.22 (m, 1H), 7.78 (d,  $J = 7.9$  Hz, 1H), 7.62 (t,  $J = 7.9$  Hz, 1H), 5.62 (dd,  $J = 8.8$ , 3.3 Hz, 1H), 4.66-4.59 (m, 2H), 3.26 (s, 1H);  $^{13}\text{C}$  NMR (150 MHz)  $\delta$  148.5, 140.1, 132.0, 130.1, 123.8, 121.1, 80.6, 69.8; HPLC: OD-H column;  $\lambda = 254$  nm; eluent: hexane/isopropanol = 90/10; flow rate: 0.8 mL/min;  $t_{\text{R}} = 34.1$  min (major),  $t_{\text{R}} = 39.1$  min (minor); ee = 96%.

**(R)-2-Nitro-1-(2-nitrophenyl)ethanol (7f).**

$[\alpha]_{\text{D}}^{20}$   $+232.5$  (*c* 0.75,  $\text{CH}_2\text{Cl}_2$ ) {lit.,<sup>8</sup>  $[\alpha]_{\text{D}}^{21}$   $+227.1$  (*c* 1.00,  $\text{CH}_2\text{Cl}_2$ ) for 89% ee};  $^1\text{H}$  NMR (600 MHz)  $\delta$  8.09 (dd,  $J = 7.0$ , 1.2 Hz, 1H), 7.96 (d,  $J = 7.9$  Hz, 1H), 7.77-7.74 (m, 1H), 7.57-7.55 (m, 1H), 6.05 (dd,  $J = 7.0$ , 2.2 Hz, 1H), 4.87 (dd,  $J = 13.7$ , 2.2 Hz, 1H), 4.56 (dd,  $J = 13.7$ , 9.1 Hz, 1H), 3.29 (s, 1H);  $^{13}\text{C}$  NMR (150 MHz)  $\delta$  147.1, 134.4, 134.0, 129.7, 128.7, 125.0, 80.0, 66.8; HPLC: OD-H column;  $\lambda = 254$  nm; eluent: hexane/isopropanol = 95/5; flow rate: 0.7 mL/min;  $t_{\text{R}} = 45.4$  min (major),  $t_{\text{R}} = 51.4$  min (minor); ee = 94%.

**(R)-2-Nitro-1-pyridin-3-yl-ethanol (7g).**

$[\alpha]_{\text{D}}^{26}$   $-52.3$  (*c* 0.34,  $\text{CH}_2\text{Cl}_2$ ) {lit.,<sup>9</sup>  $[\alpha]_{\text{D}}^{25}$   $+37.6$  (*c* 1.04,  $\text{CH}_2\text{Cl}_2$ ) for (*S*)-**7g**, 86% ee};  $^1\text{H}$  NMR (600 MHz)  $\delta$  8.56 (d,  $J = 2.1$  Hz, 1H), 8.52 (dd,  $J = 4.8$ , 1.5 Hz, 1H), 7.82 (dt,  $J = 7.9$ , 1.7 Hz, 1H), 7.37 (dd,  $J = 7.9$ , 4.8 Hz, 1H), 5.53 (dd,  $J = 9.6$ , 3.1 Hz, 1H), 4.95 (brs, 1H), 4.64 (dd,  $J = 13.2$ , 9.6 Hz, 1H), 4.56 (dd,  $J = 13.2$ , 3.1 Hz, 1H);  $^{13}\text{C}$  NMR (150 MHz)  $\delta$  149.7, 147.3, 134.6, 134.2, 124.0, 81.0, 68.6; HPLC: OD-H column;  $\lambda = 254$  nm; eluent: hexane/isopropanol = 75/25; flow rate: 0.8 mL/min;  $t_{\text{R}} = 15.6$  min (major),  $t_{\text{R}} = 30.1$  min (minor); ee = 91%.

**(R)-1-Naphtalen-1-yl-2-nitroethanol (7h).**

$[\alpha]_{\text{D}}^{28}$   $-25.8$  ( $c$  0.88,  $\text{CHCl}_3$ ) {lit.,<sup>5</sup>  $[\alpha]_{\text{D}}^{22}$   $-24.7$  ( $c$  0.58,  $\text{CHCl}_3$ ) for 93% ee};  $^1\text{H}$  NMR (600 MHz)  $\delta$  8.03 (d,  $J$  = 8.2 Hz, 1H), 7.91 (d,  $J$  = 8.2 Hz, 1H), 7.85 (d,  $J$  = 8.2 Hz, 1H), 7.75 (d,  $J$  = 7.2 Hz, 1H), 7.60-7.50 (m, 3H), 6.25 (d,  $J$  = 9.1 Hz, 1H), 4.70-4.63 (m, 2H), 2.89 (d,  $J$  = 2.9 Hz, 1H);  $^{13}\text{C}$  NMR (150 MHz)  $\delta$  133.7, 133.5, 129.5, 129.4, 129.3, 127.1, 126.1, 125.5, 123.4, 121.8, 80.8, 68.3; HPLC: OD-H column;  $\lambda$  = 254 nm; eluent: hexane/isopropanol = 85/15; flow rate: 0.8 mL/min;  $t_{\text{R}}$  = 16.0 min (major),  $t_{\text{R}}$  = 24.8 min (minor); ee = 91%.

**(R)-1-Nitro-4-phenylbutan-2-ol (7i).**

$[\alpha]_{\text{D}}^{24}$   $+9.6$  ( $c$  0.73,  $\text{CHCl}_3$ ) {lit.,<sup>10</sup>  $[\alpha]_{\text{D}}^{22}$   $+14.2$  ( $c$  1.00,  $\text{CHCl}_3$ ) for 85% ee};  $^1\text{H}$  NMR (600 MHz)  $\delta$  7.32-7.29 (m, 2H), 7.25-7.19 (m, 3H), 4.46-4.27 (m, 3H), 2.88-2.82 (m, 1H), 2.78-2.71 (m, 1H), 2.65 (brs, 1H), 1.92-1.74 (m, 2H);  $^{13}\text{C}$  NMR (150 MHz)  $\delta$  140.9, 128.9, 128.7, 126.6, 80.8, 68.0, 35.4, 31.6; HPLC: AD-H column;  $\lambda$  = 254 nm; eluent: hexane/isopropanol = 90/10; flow rate: 0.6 mL/min;  $t_{\text{R}}$  = 19.8 min (major),  $t_{\text{R}}$  = 25.3 min (minor); ee = 68%.

**2-Nitro-1-(4-nitrophenyl)propan-1-ol (7j).**

Diastereomer ratio was determined by  $^1\text{H}$  NMR. Preferred configuration was determined by comparison of elution order of HPLC using the reported value.<sup>11</sup>  $^1\text{H}$  NMR (600 MHz)  $\delta$  8.28-8.25 (m, 2H) (*syn/anti*), 7.61-7.59 (m, 2H) (*syn/anti*), 5.57 (d,  $J$  = 3.3 Hz, 0.6H) (*anti*), 5.21 (d,  $J$  = 8.2 Hz, 0.4H) (*syn*), 4.78-4.70 (m, 1H) (*syn/anti*), 3.04 (d,  $J$  = 3.4 Hz, 0.6H) (*anti*), 2.98 (d,  $J$  = 3.8 Hz, 0.4H) (*syn*), 1.50 (d,  $J$  = 6.8 Hz, 1.8H) (*anti*), 1.40 (d,  $J$  = 6.8 Hz, 1.2H) (*syn*);  $^{13}\text{C}$  NMR (150 MHz)  $\delta$  148.3 (*syn*), 147.9 (*anti*), 145.4 (*anti*), 145.2 (*syn*), 127.9 (*syn*), 127.0 (*anti*), 124.1 (*syn*), 123.9 (*anti*), 87.7 (*syn*), 86.7 (*anti*), 75.0 (*syn*), 72.8 (*anti*), 16.2 (*syn*), 11.8 (*anti*); HPLC: AS-H column;  $\lambda$  = 254 nm; eluent: hexane/isopropanol = 90/10; flow rate: 1.0 mL/min;  $t_{\text{R}}$  = 35.9 min (*anti*),  $t_{\text{R}}$  = 44.2 min (*syn* minor: 1*S*,2*S*),  $t_{\text{R}}$  = 51.1 min (*syn* major: 1*R*,2*R*); ee<sub>*syn*</sub> = 89%; OJ-H column;  $\lambda$  = 254 nm; eluent: hexane/isopropanol = 85/15; flow rate: 0.7 mL/min;  $t_{\text{R}}$  = 40.2 min (*anti* minor: 1*S*,2*R*),  $t_{\text{R}}$  = 43.3 min (*anti* major: 1*R*,2*S*),  $t_{\text{R}}$  = 63.8 min (*syn*); ee<sub>*anti*</sub> = 93%.

**2-Nitro-1-(4-nitrophenyl)butan-1-ol (7k).**

Diastereomer ratio was determined by  $^1\text{H}$  NMR. Preferred configuration was determined by

comparison of elution order of HPLC using the reported value.<sup>12</sup> <sup>1</sup>H NMR (600 MHz)  $\delta$  8.28-8.23 (m, 2H) (*syn/anti*), 7.60-7.58 (m, 2H) (*syn/anti*), 5.34 (d,  $J = 4.5$  Hz, 0.4H) (*anti*), 5.19 (d,  $J = 8.4$  Hz, 0.6H) (*syn*), 4.64-4.57 (m, 1H) (*syn/anti*), 3.05 (brs, 0.4H) (*anti*), 2.96 (brs, 0.6H) (*syn*), 2.23-2.15 (m, 0.4H) (*anti*), 1.97-1.90 (m, 0.6H) (*syn*), 1.87-1.80 (m, 0.4H) (*anti*), 1.53-1.46 (m, 0.6H) (*syn*), 0.96-0.91 (m, 3H) (*syn/anti*); <sup>13</sup>C NMR (150 MHz)  $\delta$  148.2 (*syn*), 148.0 (*anti*), 145.5 (*syn*), 145.4 (*anti*), 127.8 (*syn*), 127.2 (*anti*), 124.1 (*syn*), 123.9 (*anti*), 94.5 (*syn*), 94.1 (*anti*), 74.3 (*syn*), 73.2 (*anti*), 23.8 (*syn*), 21.1 (*anti*), 10.3 (*anti*), 10.1 (*syn*); HPLC: AD-H column;  $\lambda = 254$  nm; eluent: hexane/isopropanol = 90/10; flow rate: 1.0 mL/min;  $t_R = 13.6$  min (*anti*),  $t_R = 21.1$  min (*syn* major: 1*R*,2*R*),  $t_R = 33.4$  min (*syn* minor: 1*S*,2*S*);  $ee_{syn} = 87\%$ ; OD-H column;  $\lambda = 254$  nm; eluent: hexane/isopropanol = 90/10; flow rate: 1.0 mL/min;  $t_R = 13.5$  min (*anti* major: 1*R*,2*S*),  $t_R = 15.0$  min (*anti* minor: 1*R*,2*S*),  $t_R = 18.6$  min (*syn*);  $ee_{anti} = 91\%$ .

#### **1-(4-Chlorophenyl)-2-nitropropan-1-ol (7I).**

Diastereomer ratio was determined by <sup>1</sup>H NMR. Preferred configuration was determined by comparison of elution order of HPLC using the reported value.<sup>11</sup> <sup>1</sup>H NMR (600 MHz)  $\delta$  7.39-7.31 (m, 4H) (*syn/anti*), 5.38 (s, 0.6H) (*anti*), 5.03 (d,  $J = 8.8$  Hz, 0.4H) (*syn*), 4.75-4.64 (m, 1H) (*syn/anti*), 2.82 (d,  $J = 2.7$  Hz, 0.6H) (*anti*), 2.72 (s, 0.4H) (*syn*), 1.50 (d,  $J = 7.0$  Hz, 1.8H) (*anti*), 1.33 (d,  $J = 7.0$  Hz, 1.2H) (*syn*); <sup>13</sup>C NMR (150 MHz)  $\delta$  136.8 (*anti*), 136.7 (*syn*), 135.1 (*syn*), 134.4 (*anti*), 129.2 (*syn*), 128.9 (*anti*), 128.2 (*syn*), 127.3 (*anti*), 88.1 (*syn*), 87.1 (*anti*), 75.5 (*syn*), 73.2 (*anti*), 16.4 (*syn*), 12.0 (*anti*); HPLC: AD-H column;  $\lambda = 254$  nm; eluent: hexane/isopropanol = 97/3; flow rate: 1.0 mL/min;  $t_R = 25.6$  min (*anti* minor: 1*S*,2*R*),  $t_R = 27.0$  min (*anti* major: 1*R*,2*S*);  $ee_{anti} = 91\%$ ;  $t_R = 37.3$  min (*syn* major: 1*R*,2*R*),  $t_R = 42.5$  min (*syn* minor: 1*S*,2*S*);  $ee_{syn} = 89\%$ .



857-865.

8. D. A. Evans, D. Seidel, M. Rueping, H. W. Lam, J. T. Shaw, C. W. Downey, *J. Am. Chem. Soc.* **2003**, *125*, 12692-12693.

9. T. Marcelli, R. N. S. van der Haas, J. H. van Maarseveen, H. Hiemstra, *Angew. Chem. Int. Ed.* **2006**, *45*, 929-931.

10. M. Rachwalski, S. Leśniak, E. Sznajder, P. Kiełbasiński, *Tetrahedron: Asymmetry* **2009**, *20*, 1547-1549.

11. M. Breuning, D. Hein, M. Steiner, V. H. Gessner, C. Strohmann, *Chem. Eur. J.* **2009**, *15*, 12764-12769.

12. R. Kowalczyk, J. Skarzewski, *Tetrahedron: Asymmetry* **2009**, *20*, 2467-2473.

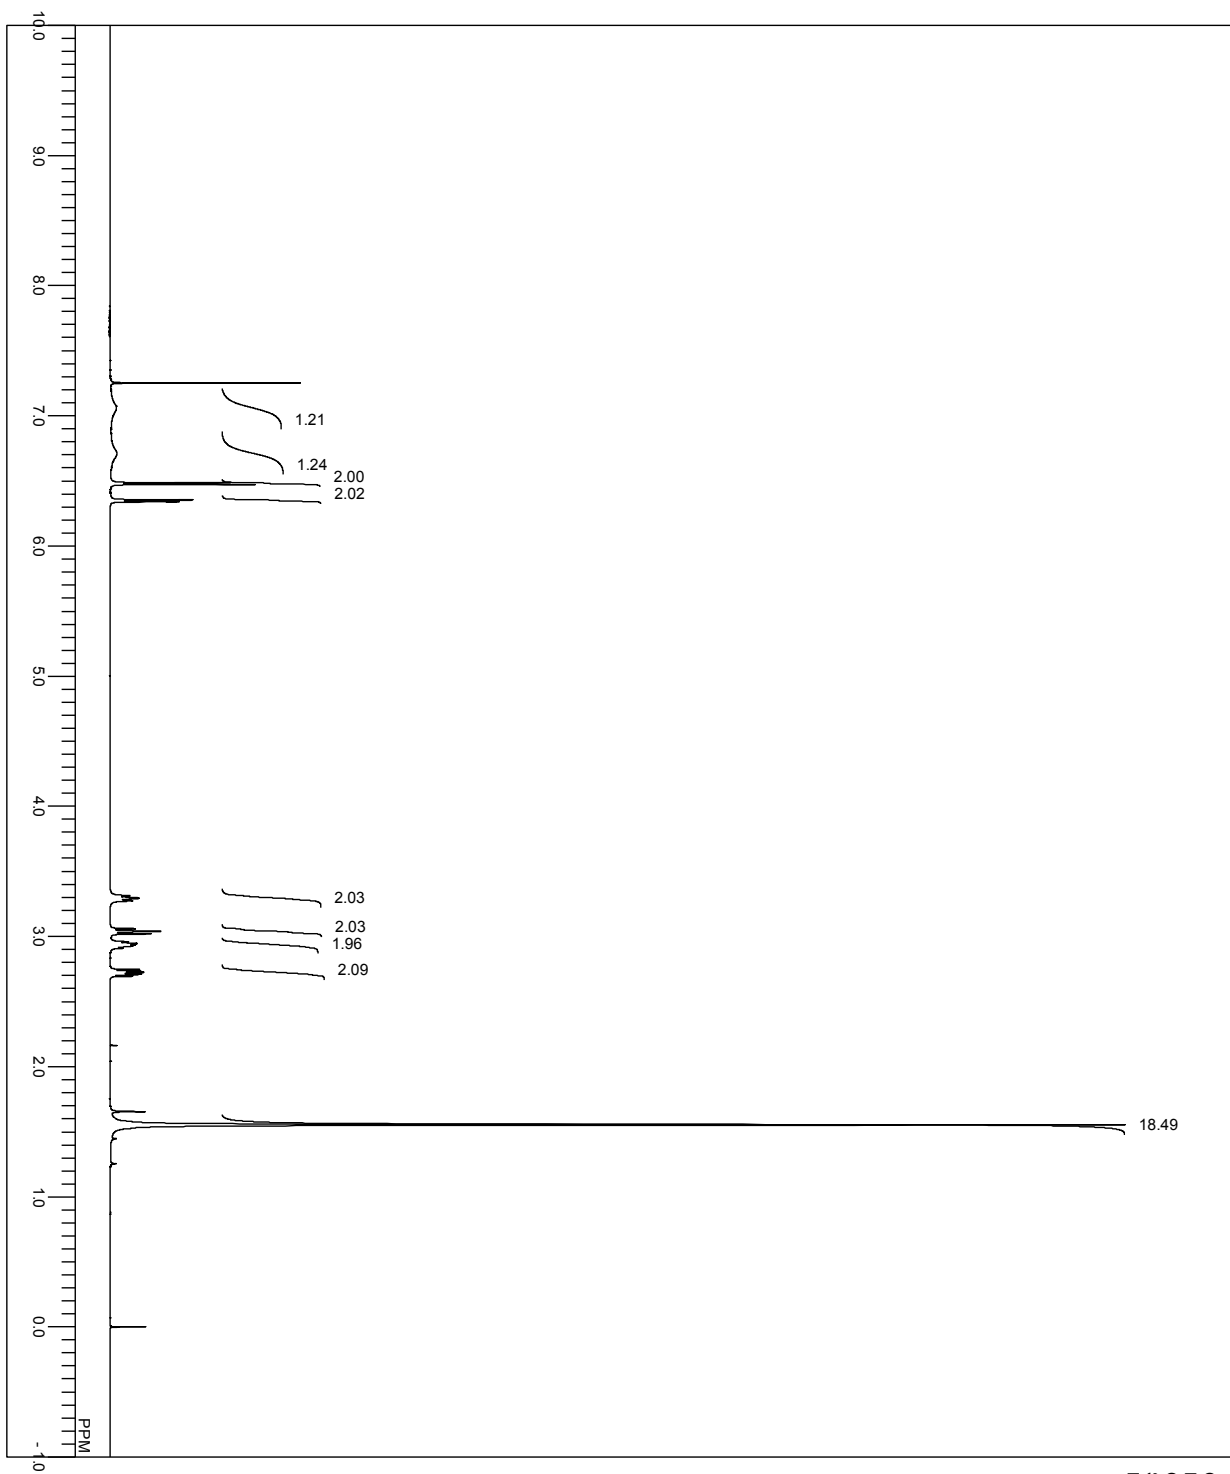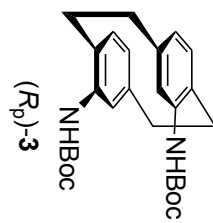

OBNUC  
EXMOD  
OBFRQ  
S1.VNT  
EXREF

1H  
single\_pulsex2  
600.17 MHz  
CDCL3  
0.000 ppm

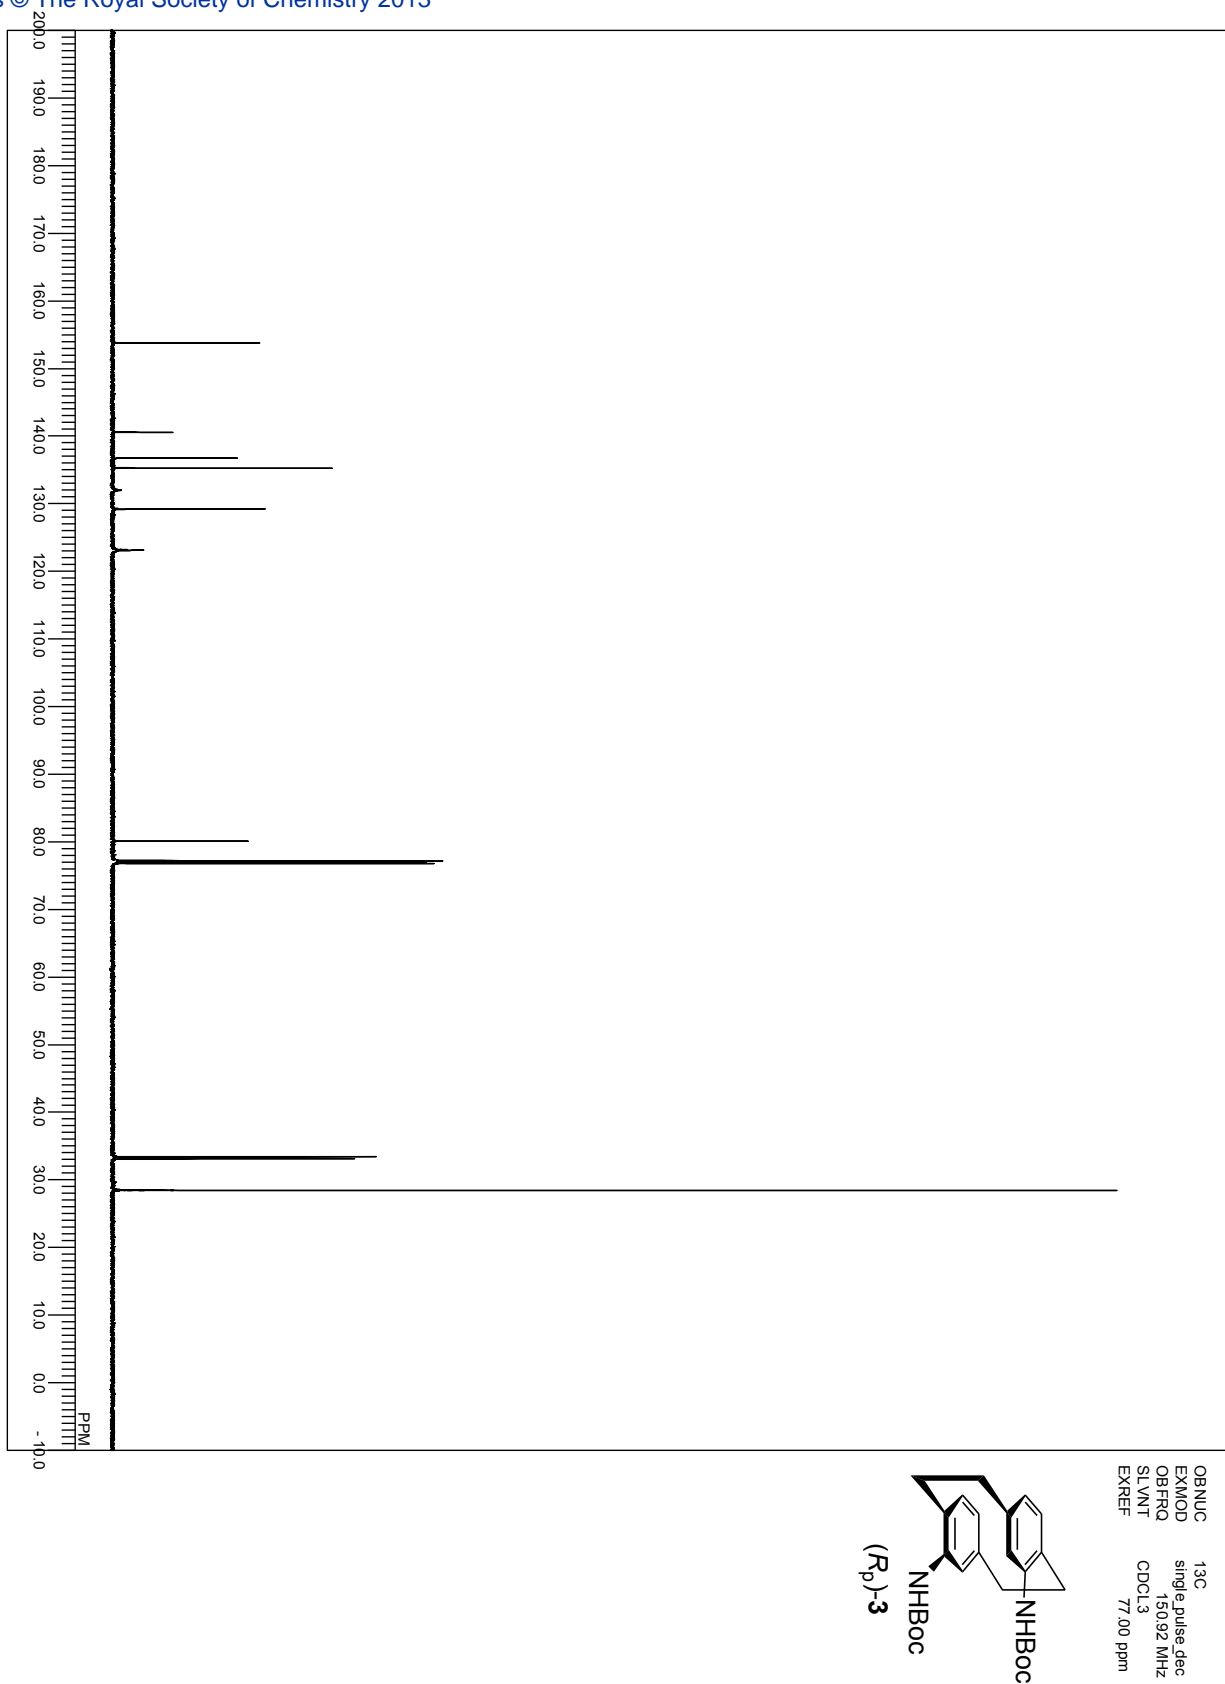

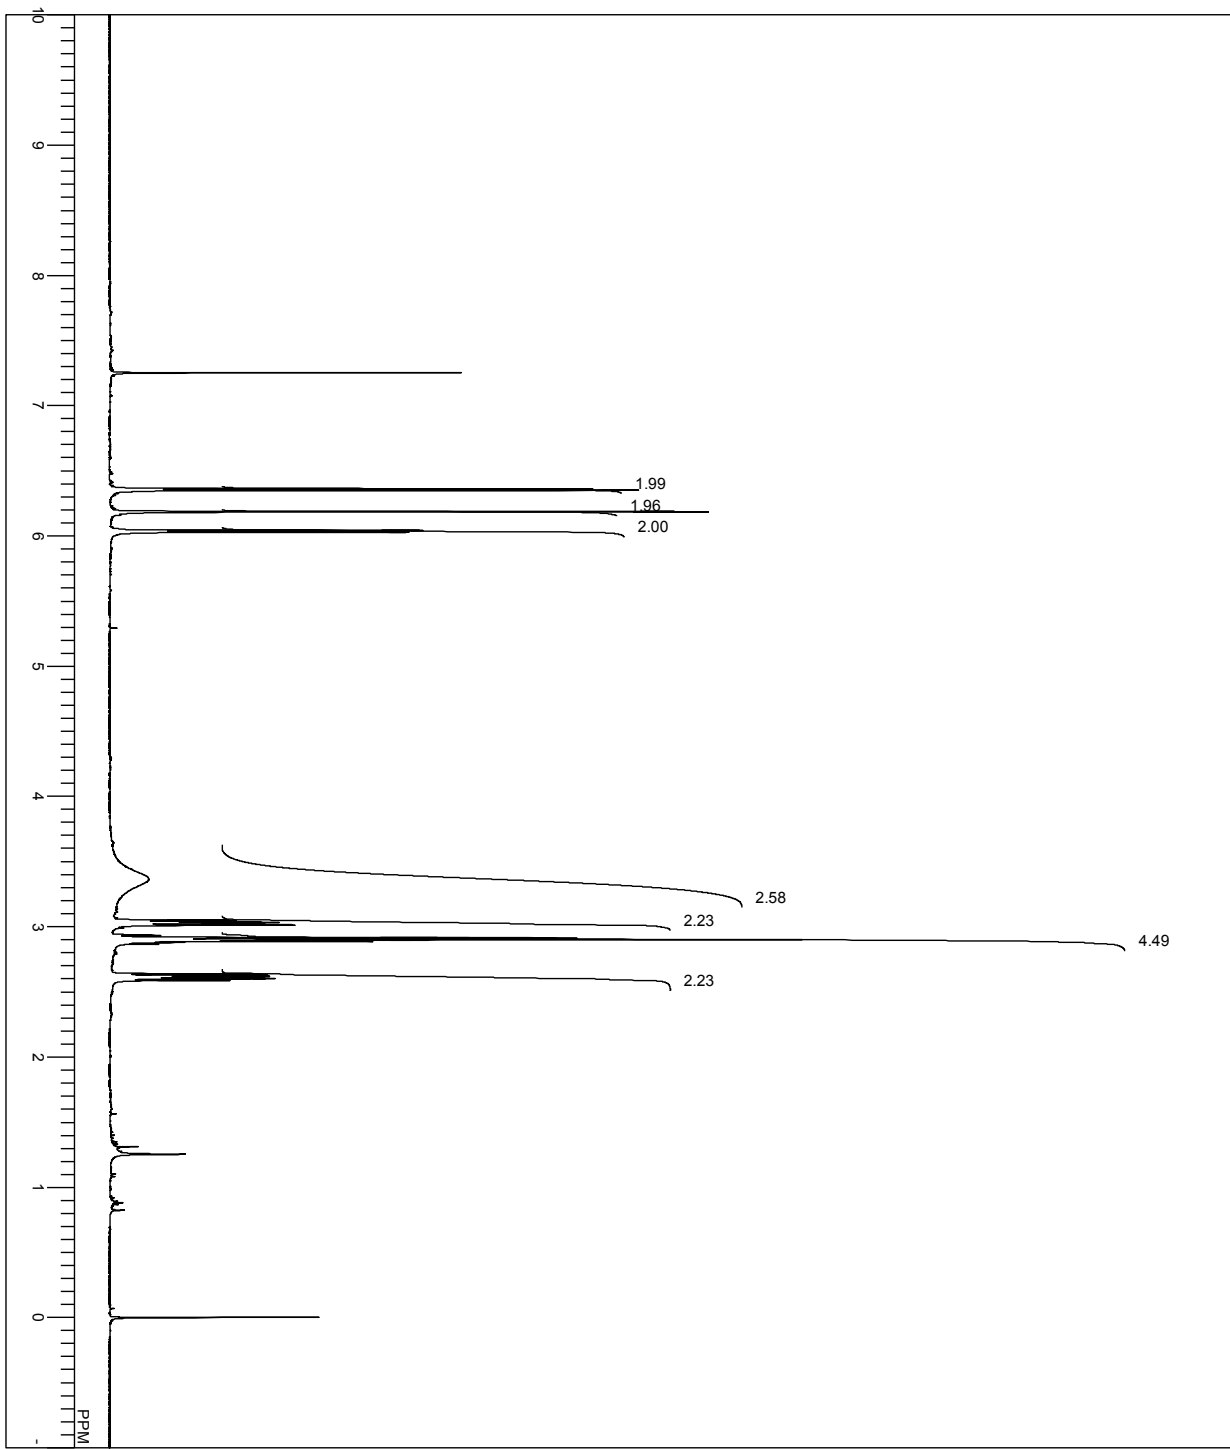

OBNUC  
EXMOD  
OBFRQ  
S1VNT  
EXREF

<sup>1</sup>H  
single\_pulsex2  
600.17 MHz  
CDCL3  
0.00 ppm

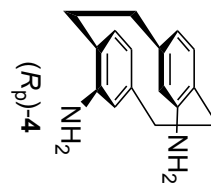



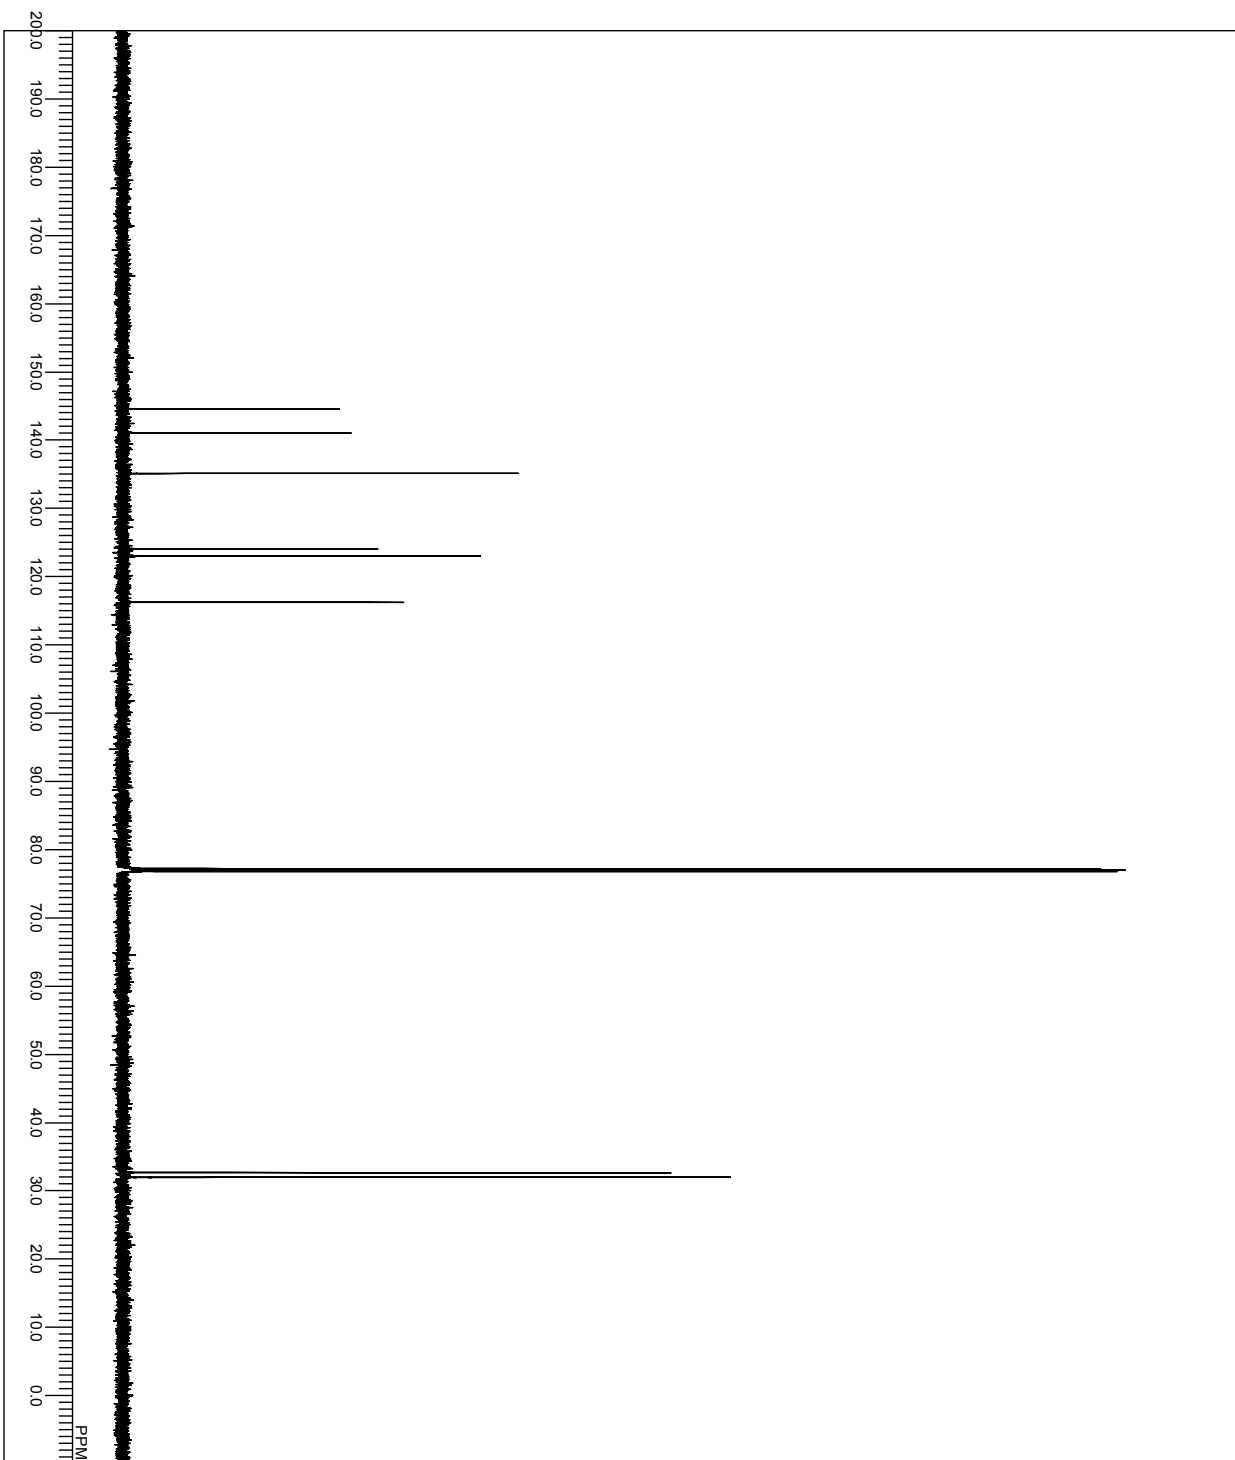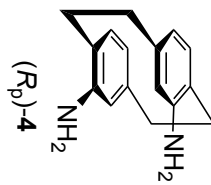

OBNUC 13C  
EXM0D single\_pulse\_dec  
OBFRQ 150.92 MHz  
SLVNT CDCL3  
EXREF 77.00 ppm

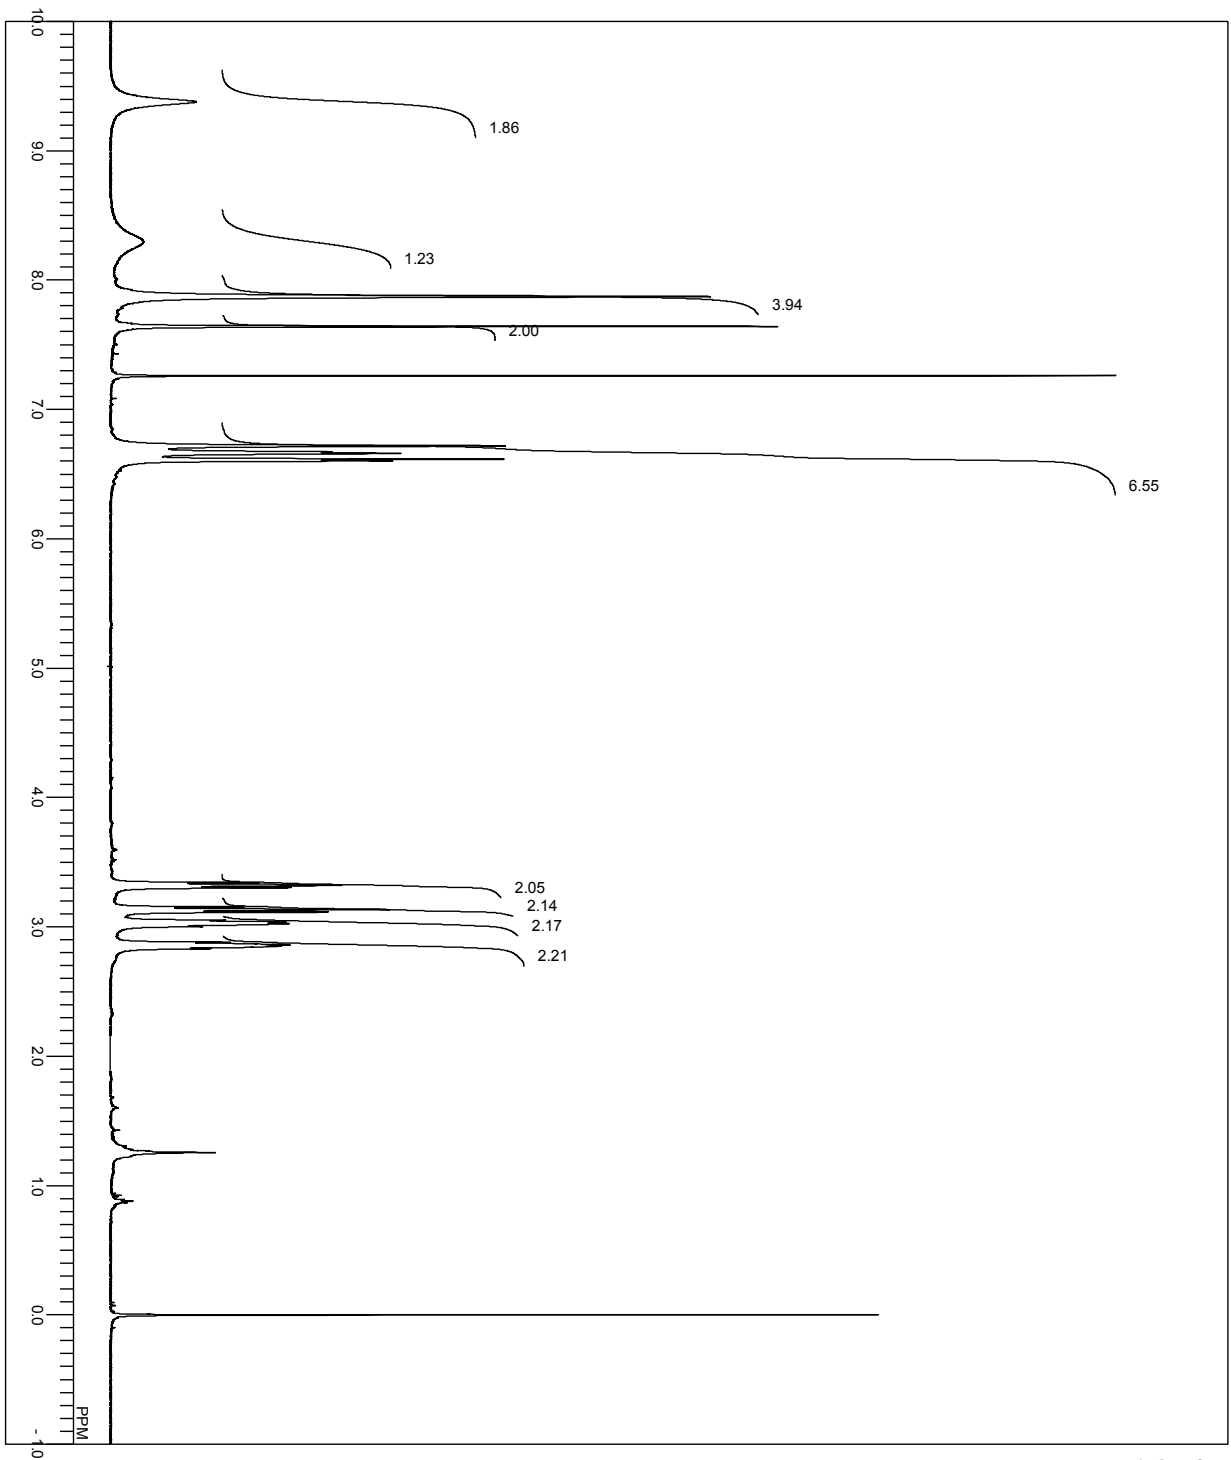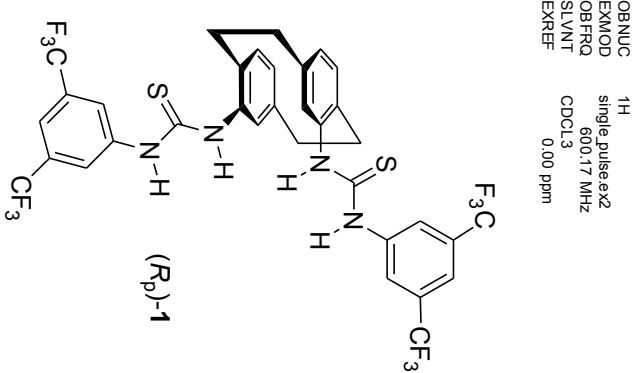

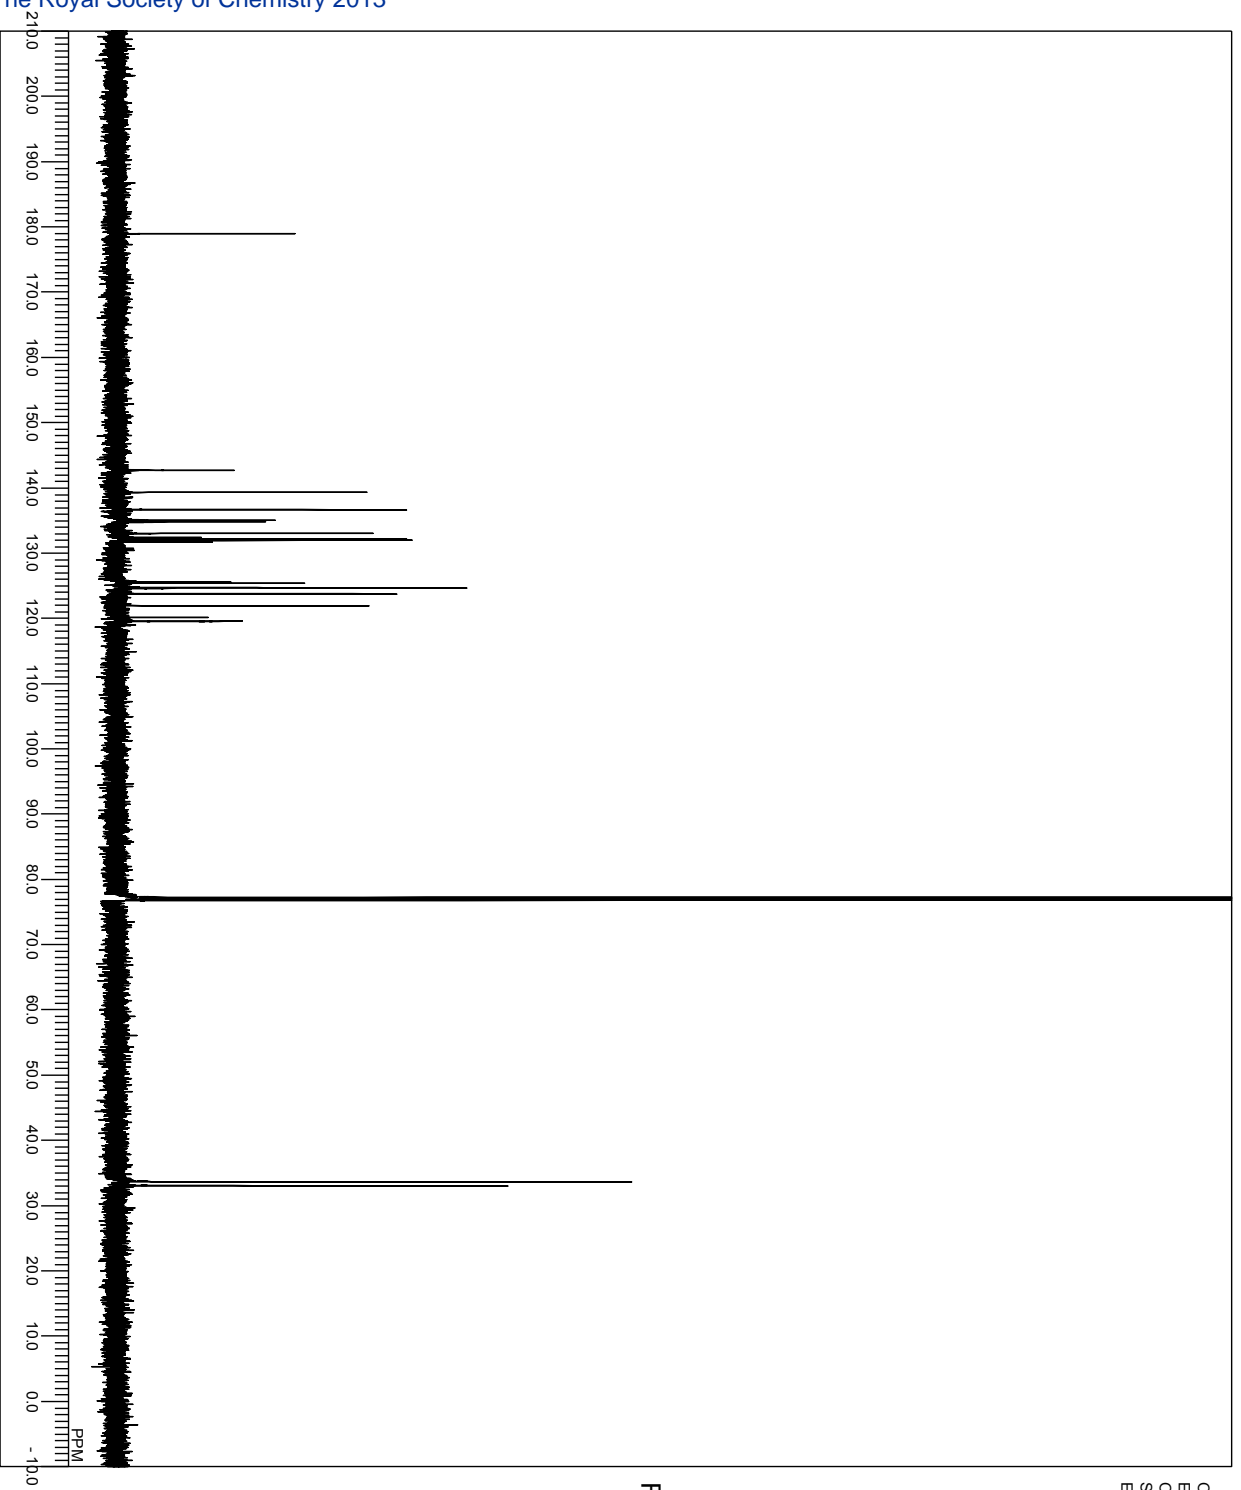

OBNUC 13C  
EXMOD single pulse dec  
OBFRQ 150.92 MHz  
SLVNT CDCl3  
EXREF 77.00 ppm

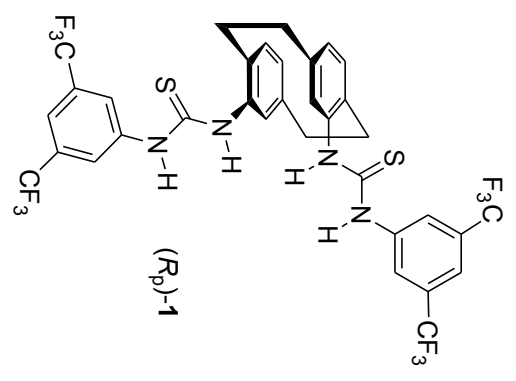

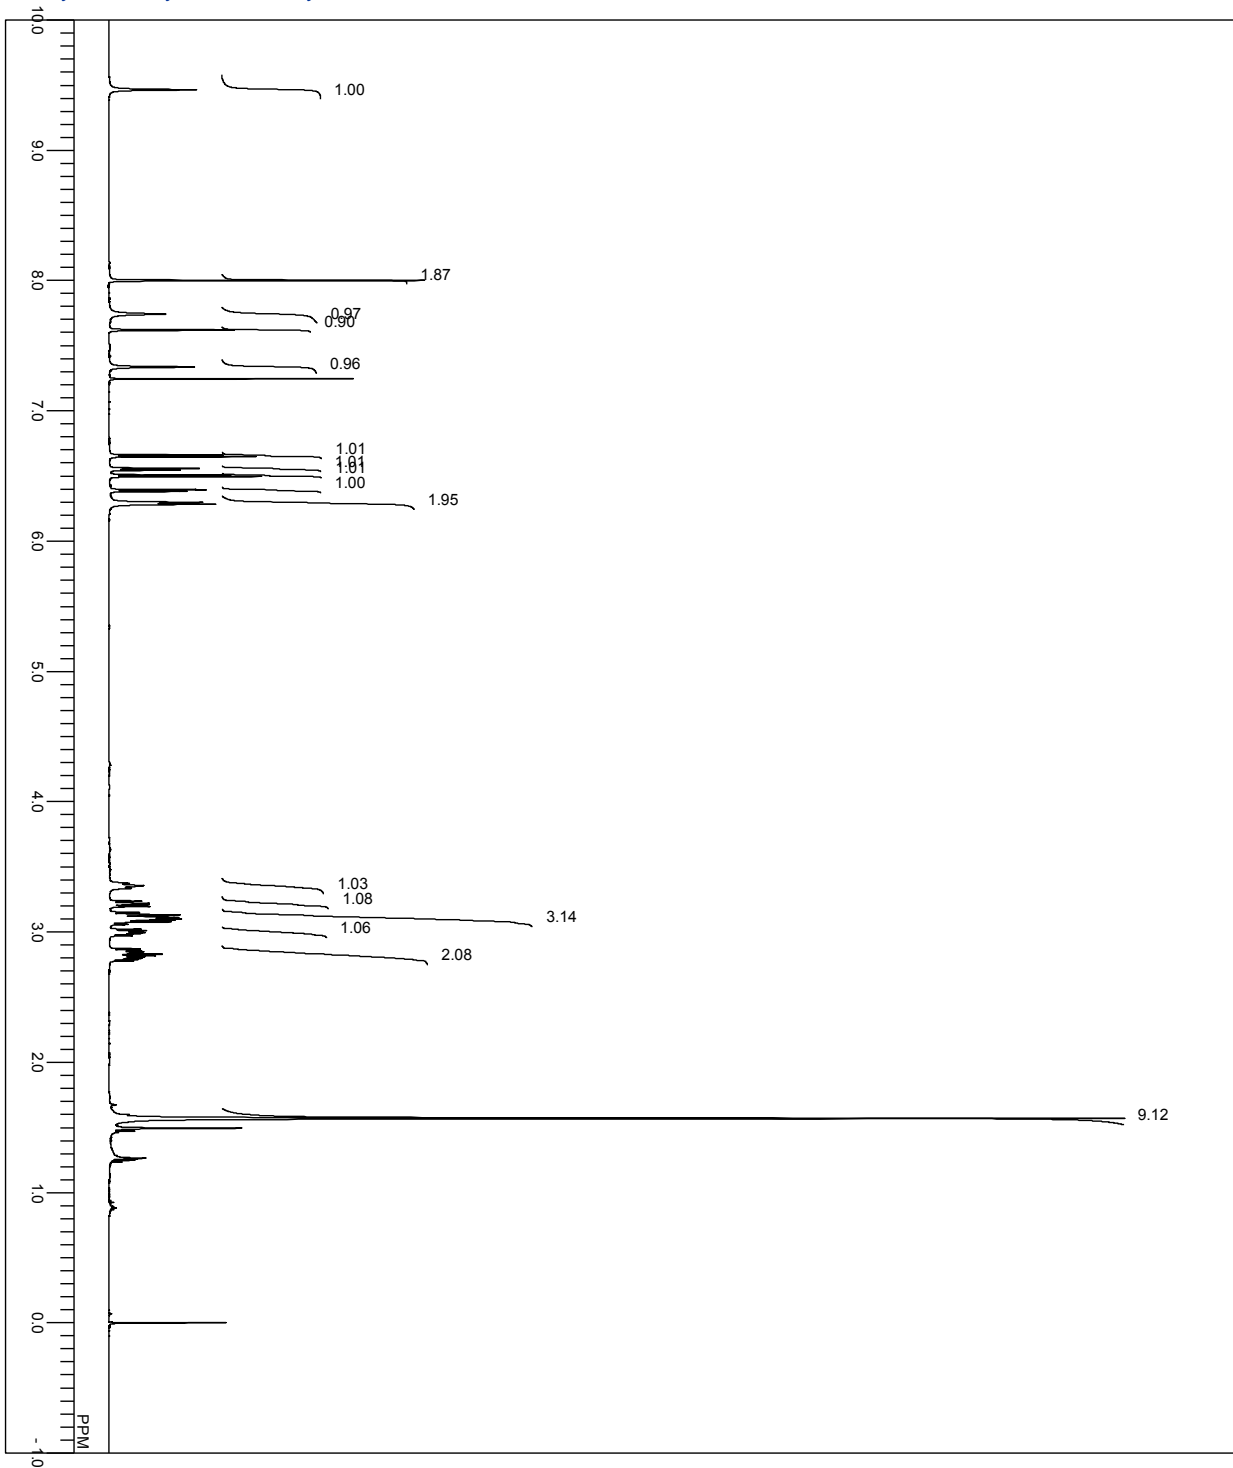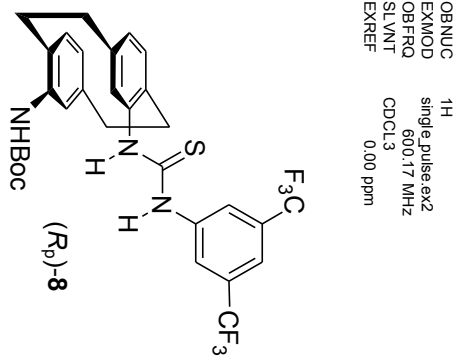

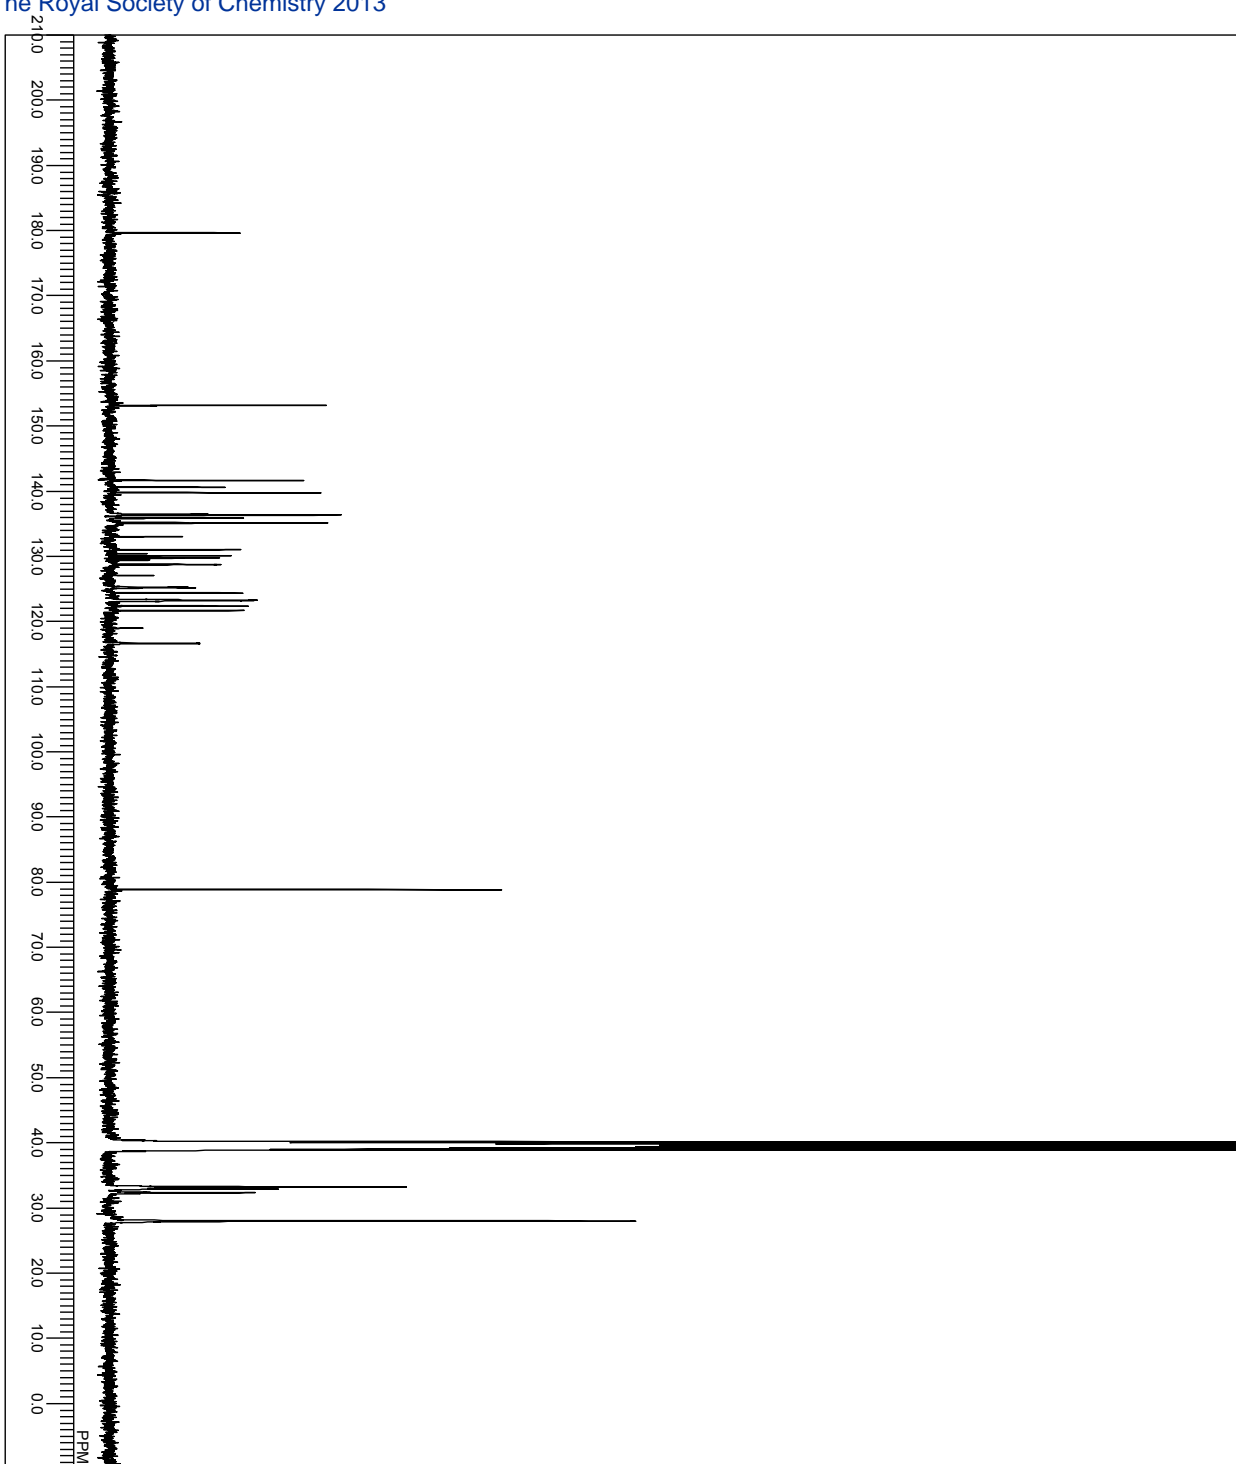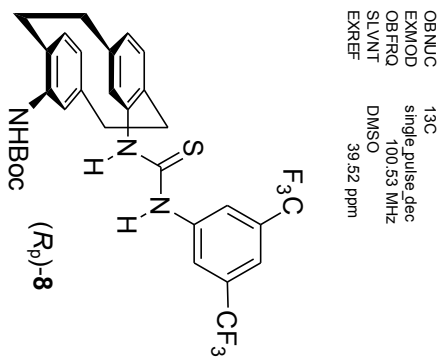

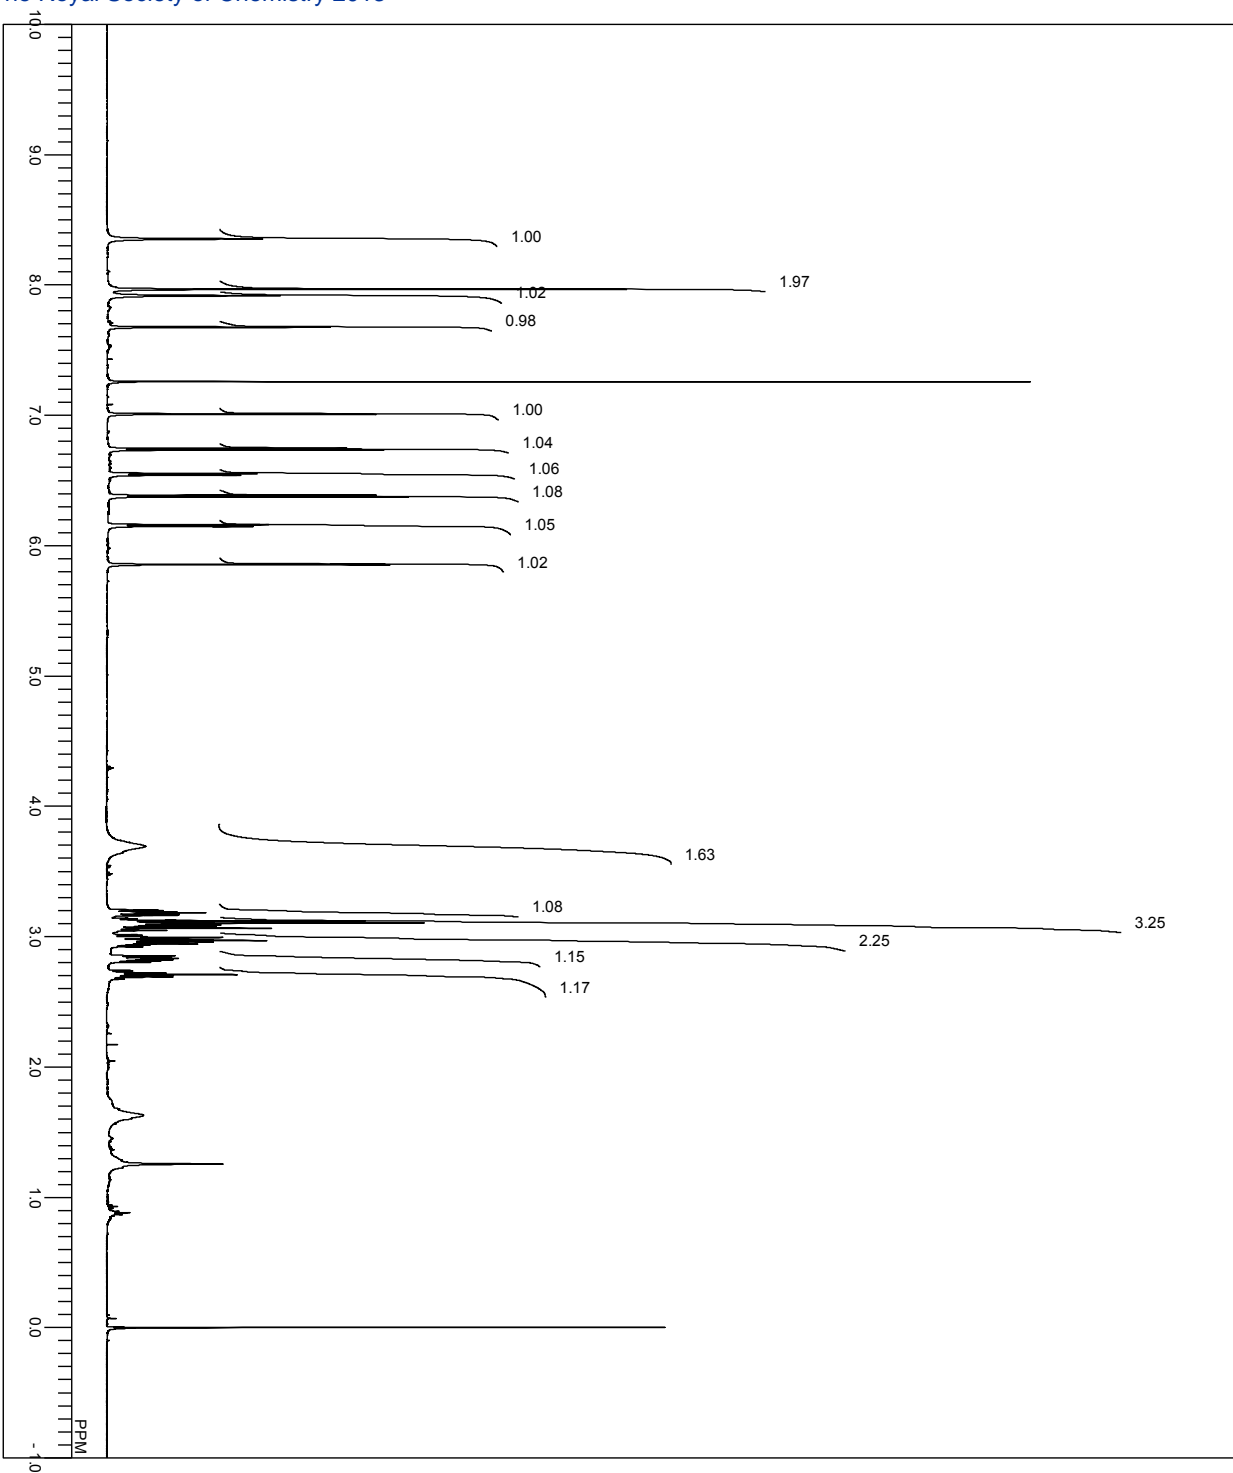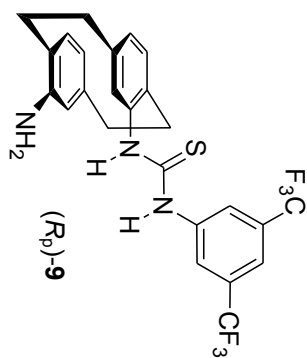

OBNUC  
EXMOD  
OBFRQ  
SLVNT  
EXREF

<sup>1</sup>H  
single\_pulse.ex2  
600.17 MHz  
CDCL3  
0.00 ppm

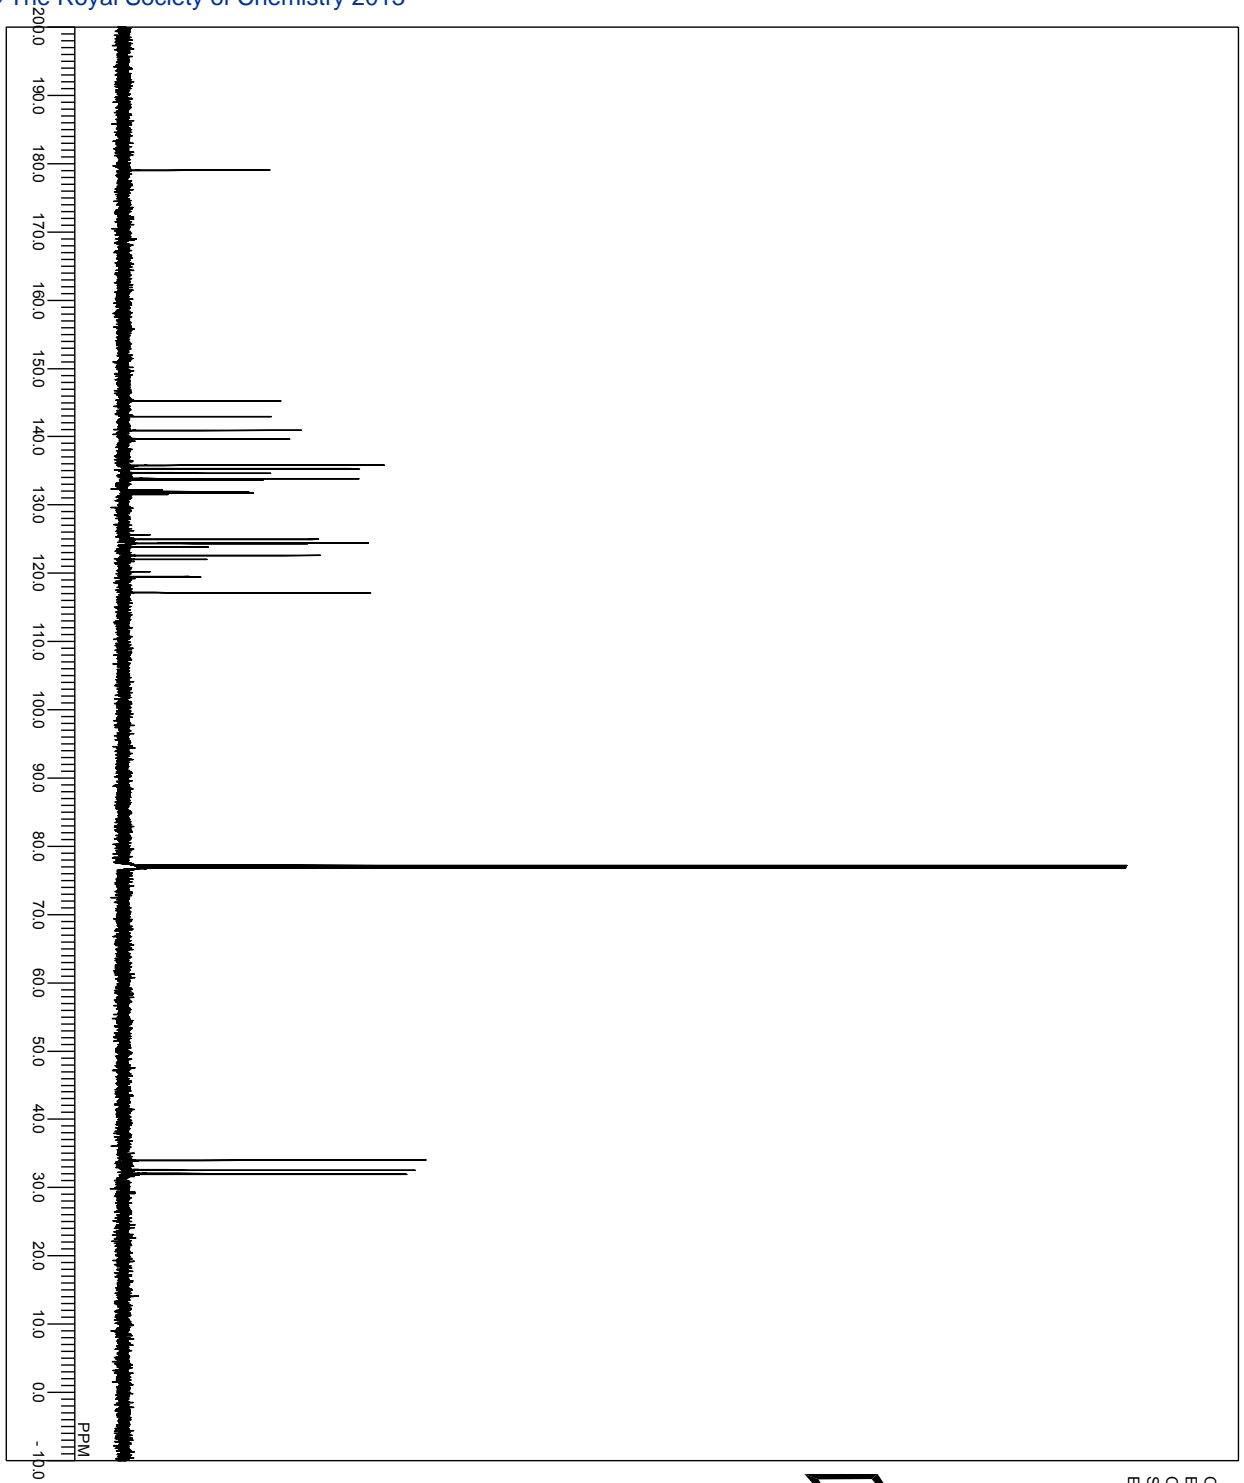

OBNUC 13C  
EXMOD single pulse dec  
OBFRQ 150.92 MHz  
SLVNT CDCL3  
EXREF 77.00 ppm

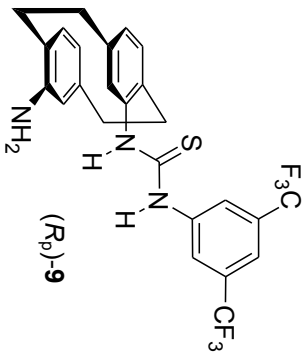

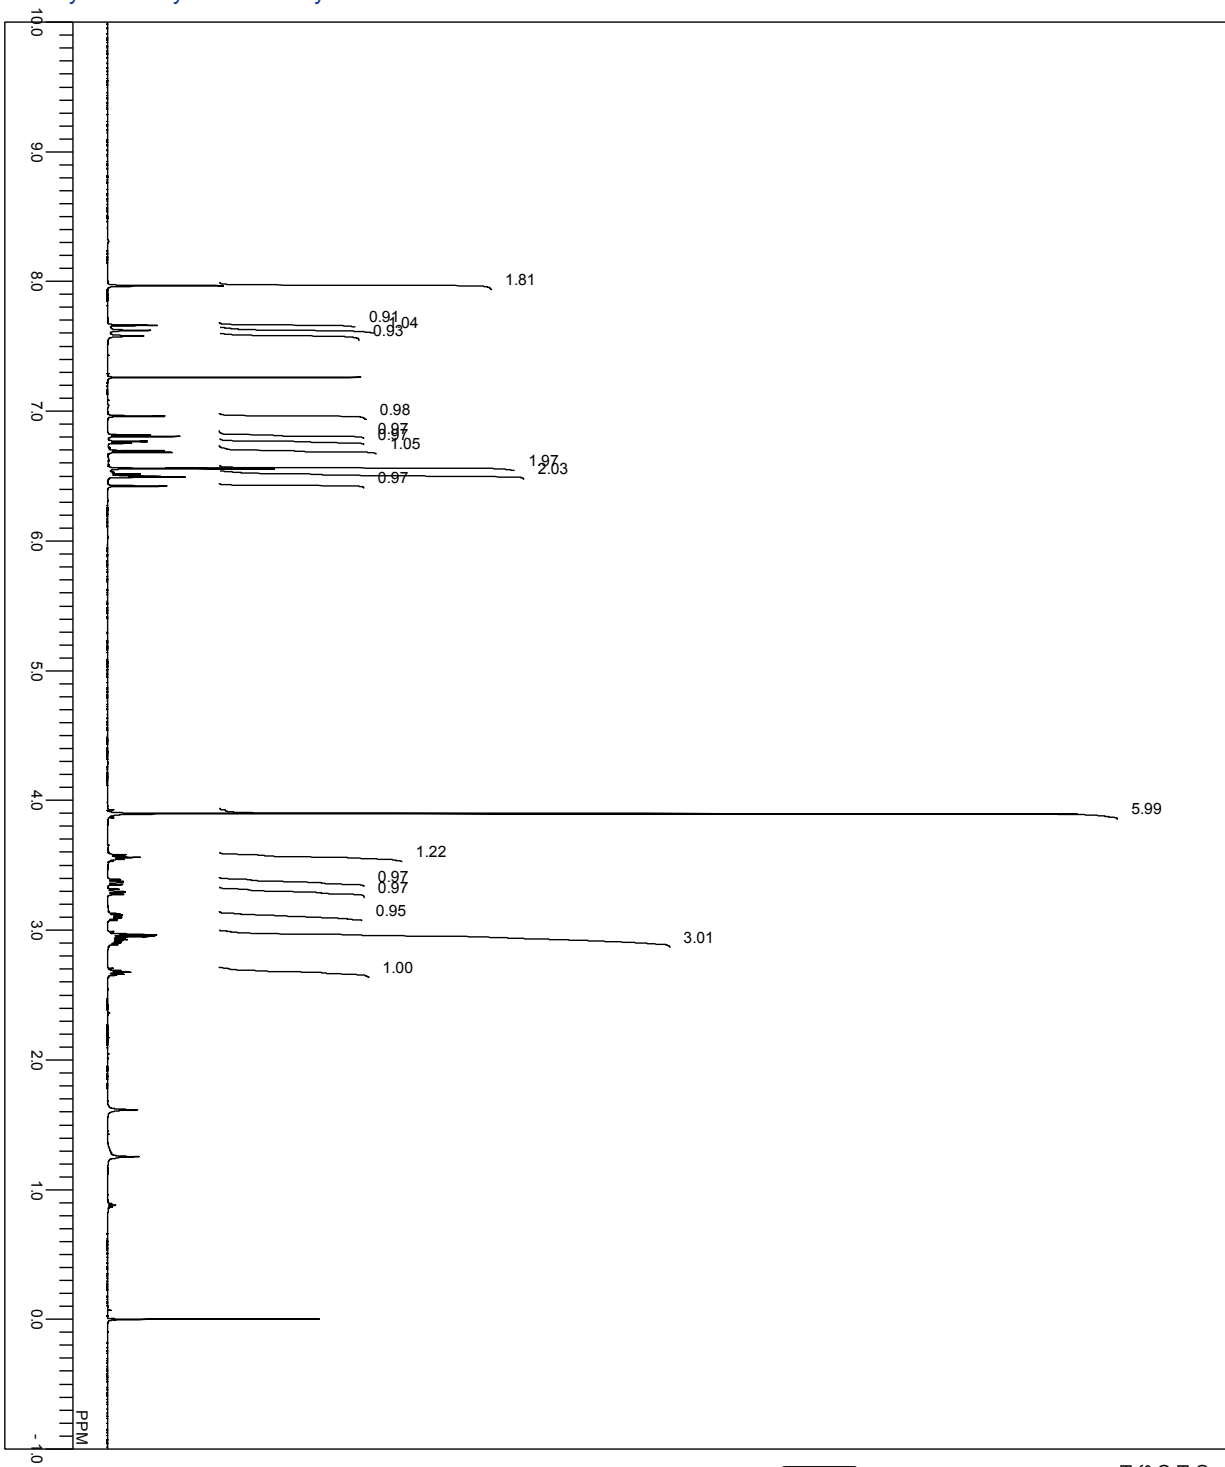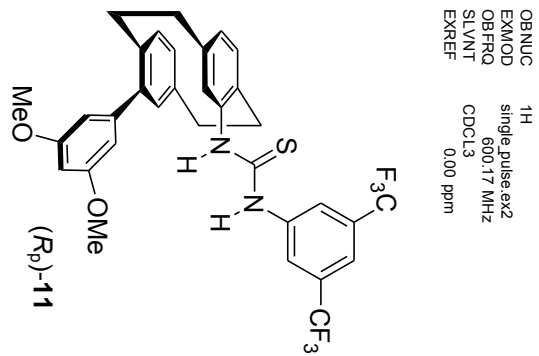



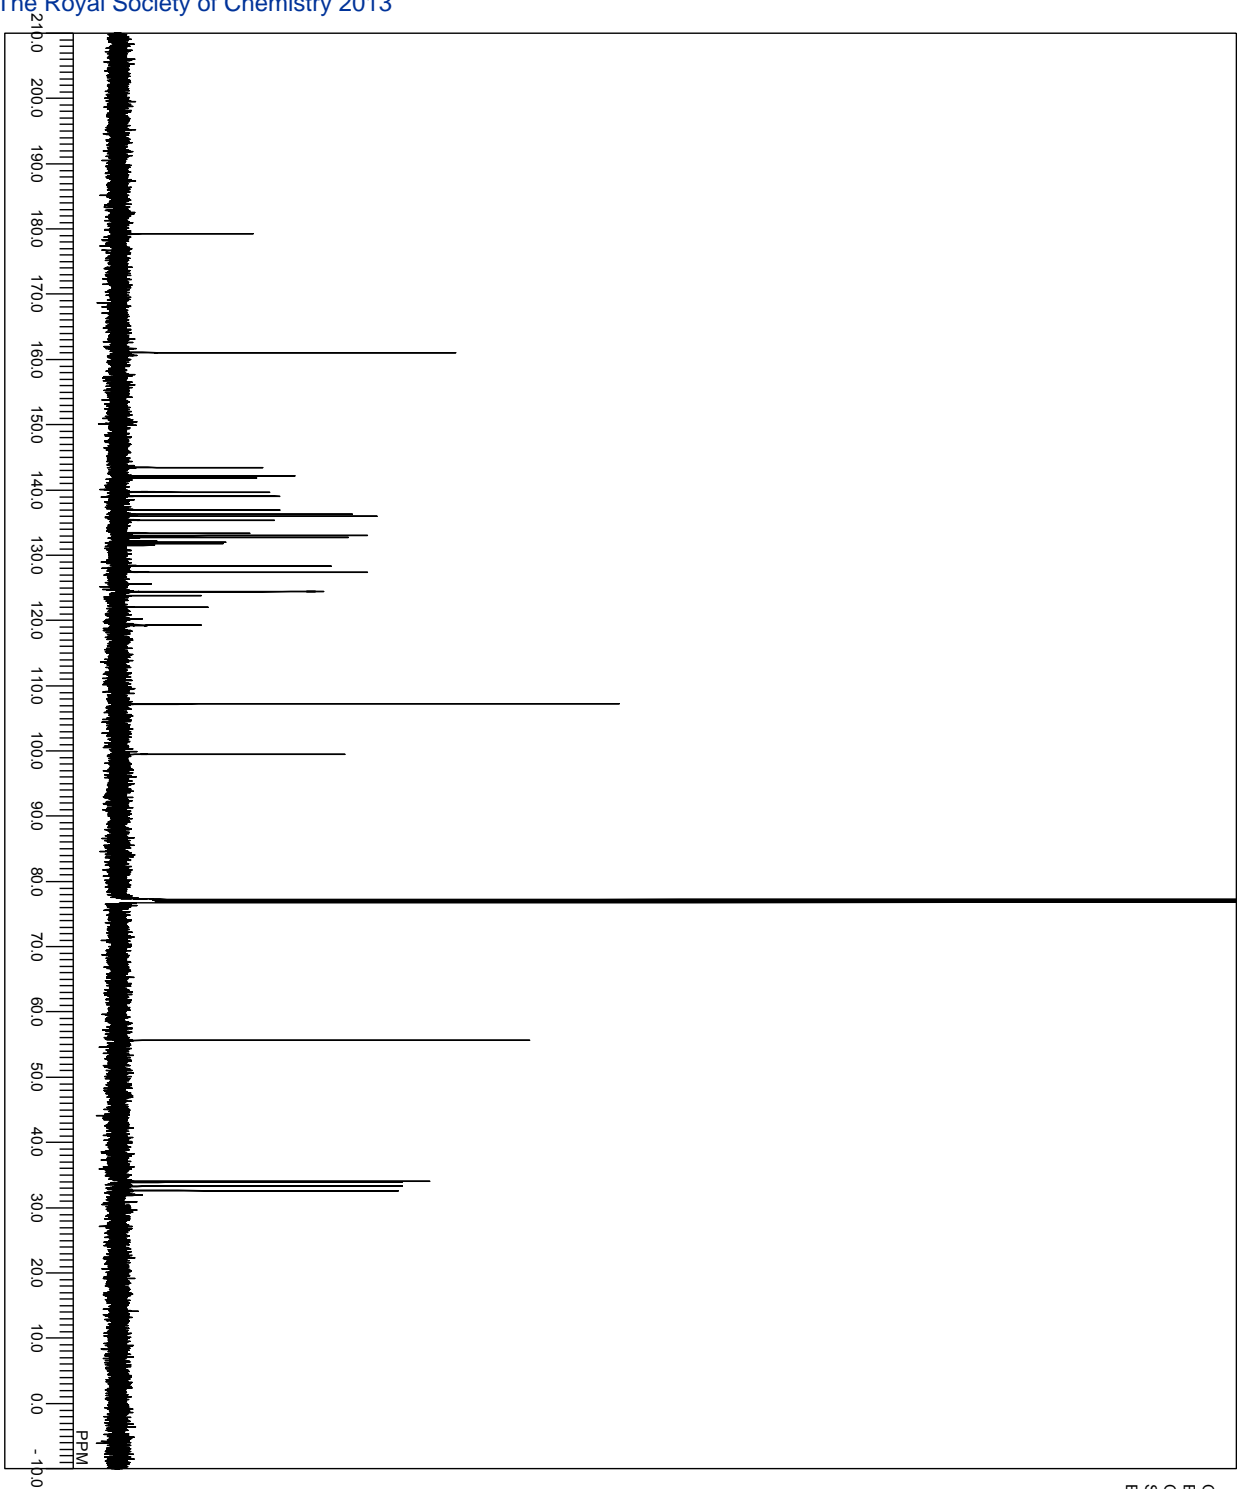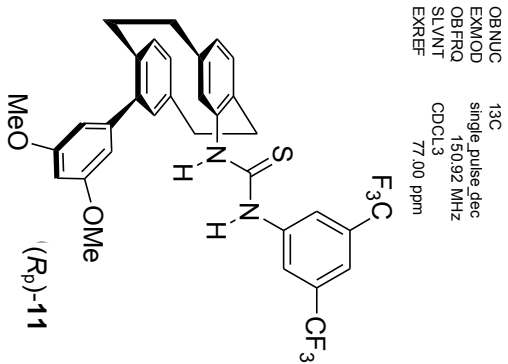

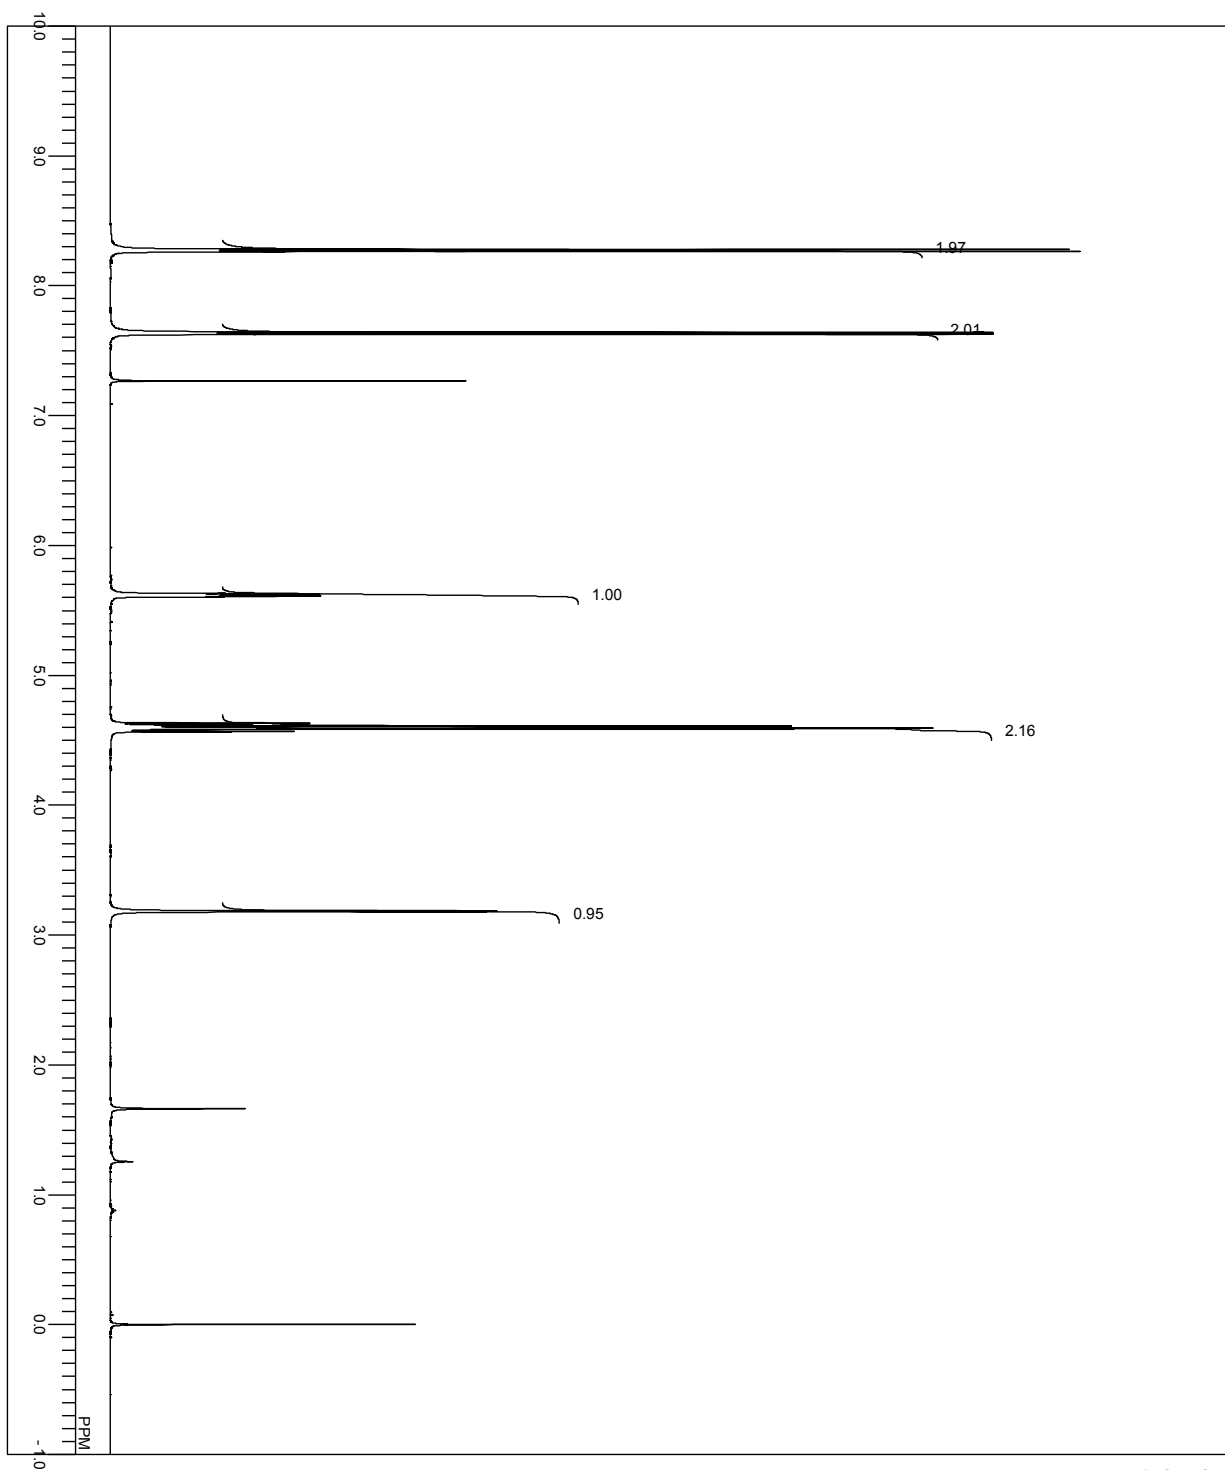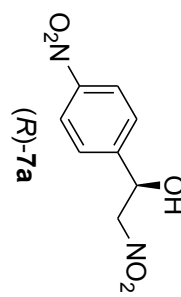

OBNUC  
EXMOD single\_pulsex2  
OBFRQ 600.17 MHz  
SLVNT CDCL3  
EXREF 0.00 ppm

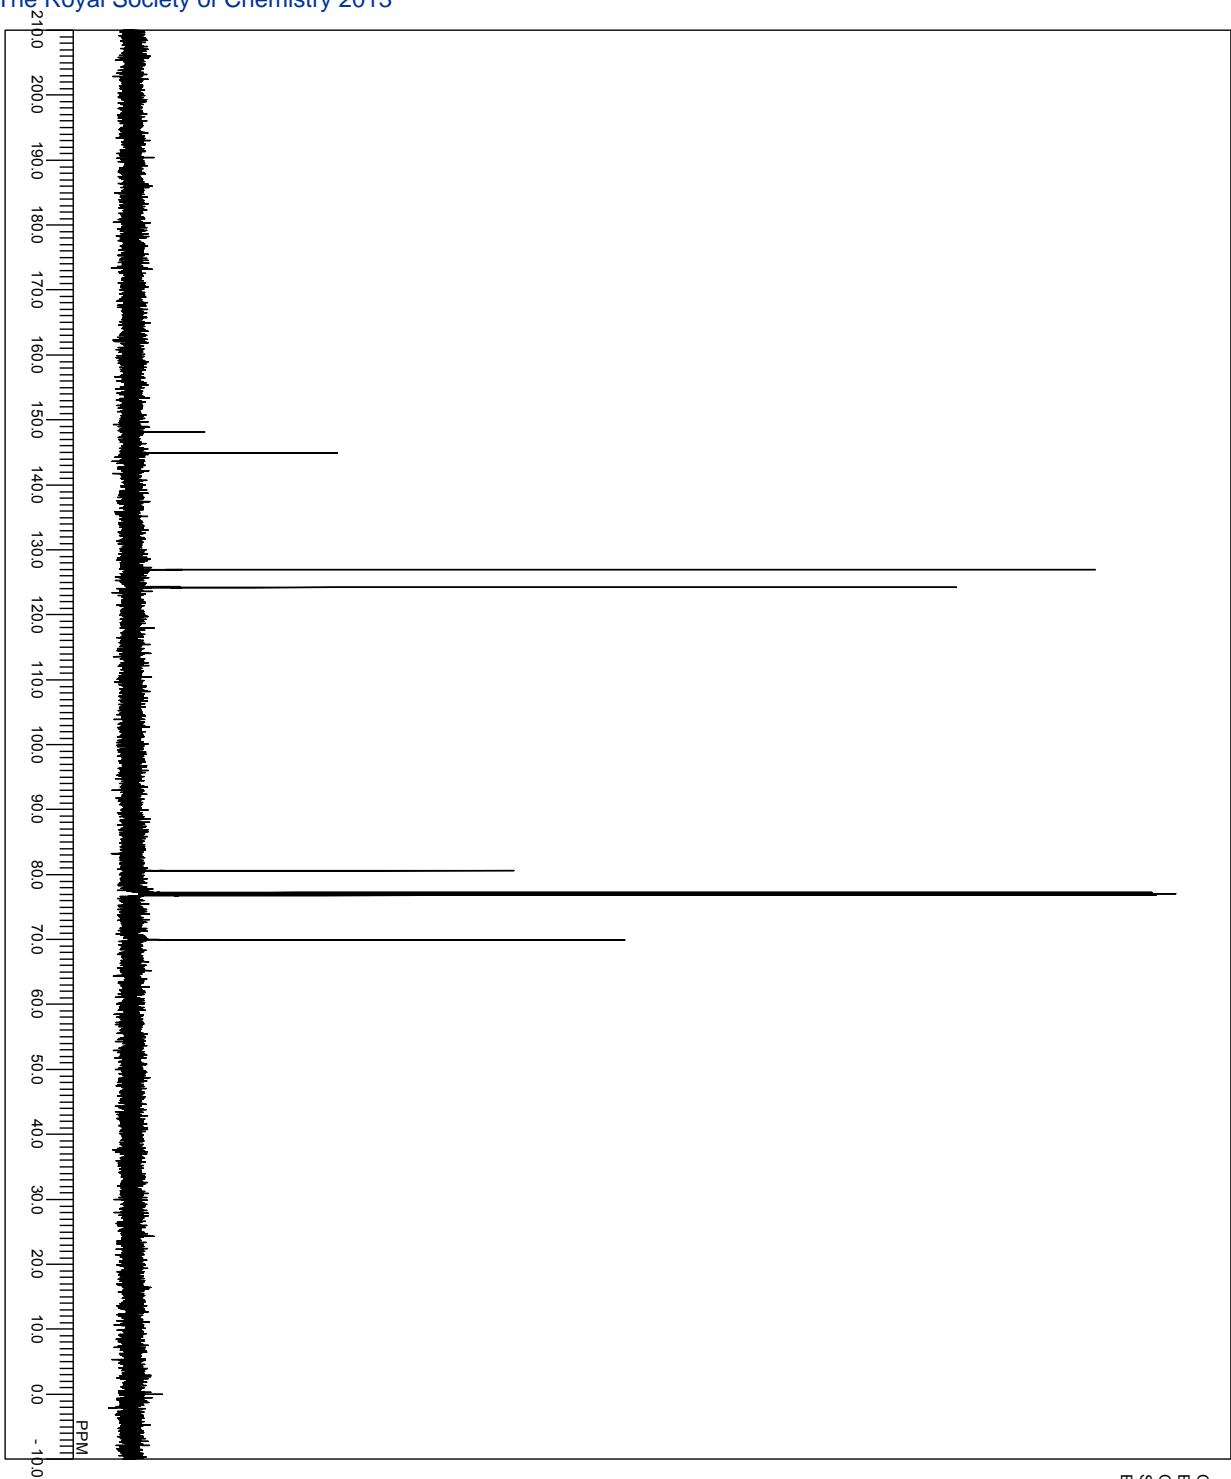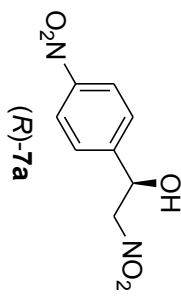

OBNUC 13C  
EXM0D single-pulse dec  
ORFRO 150.92 MHz  
SLVNT CDCL3  
EXREF 77.00 ppm

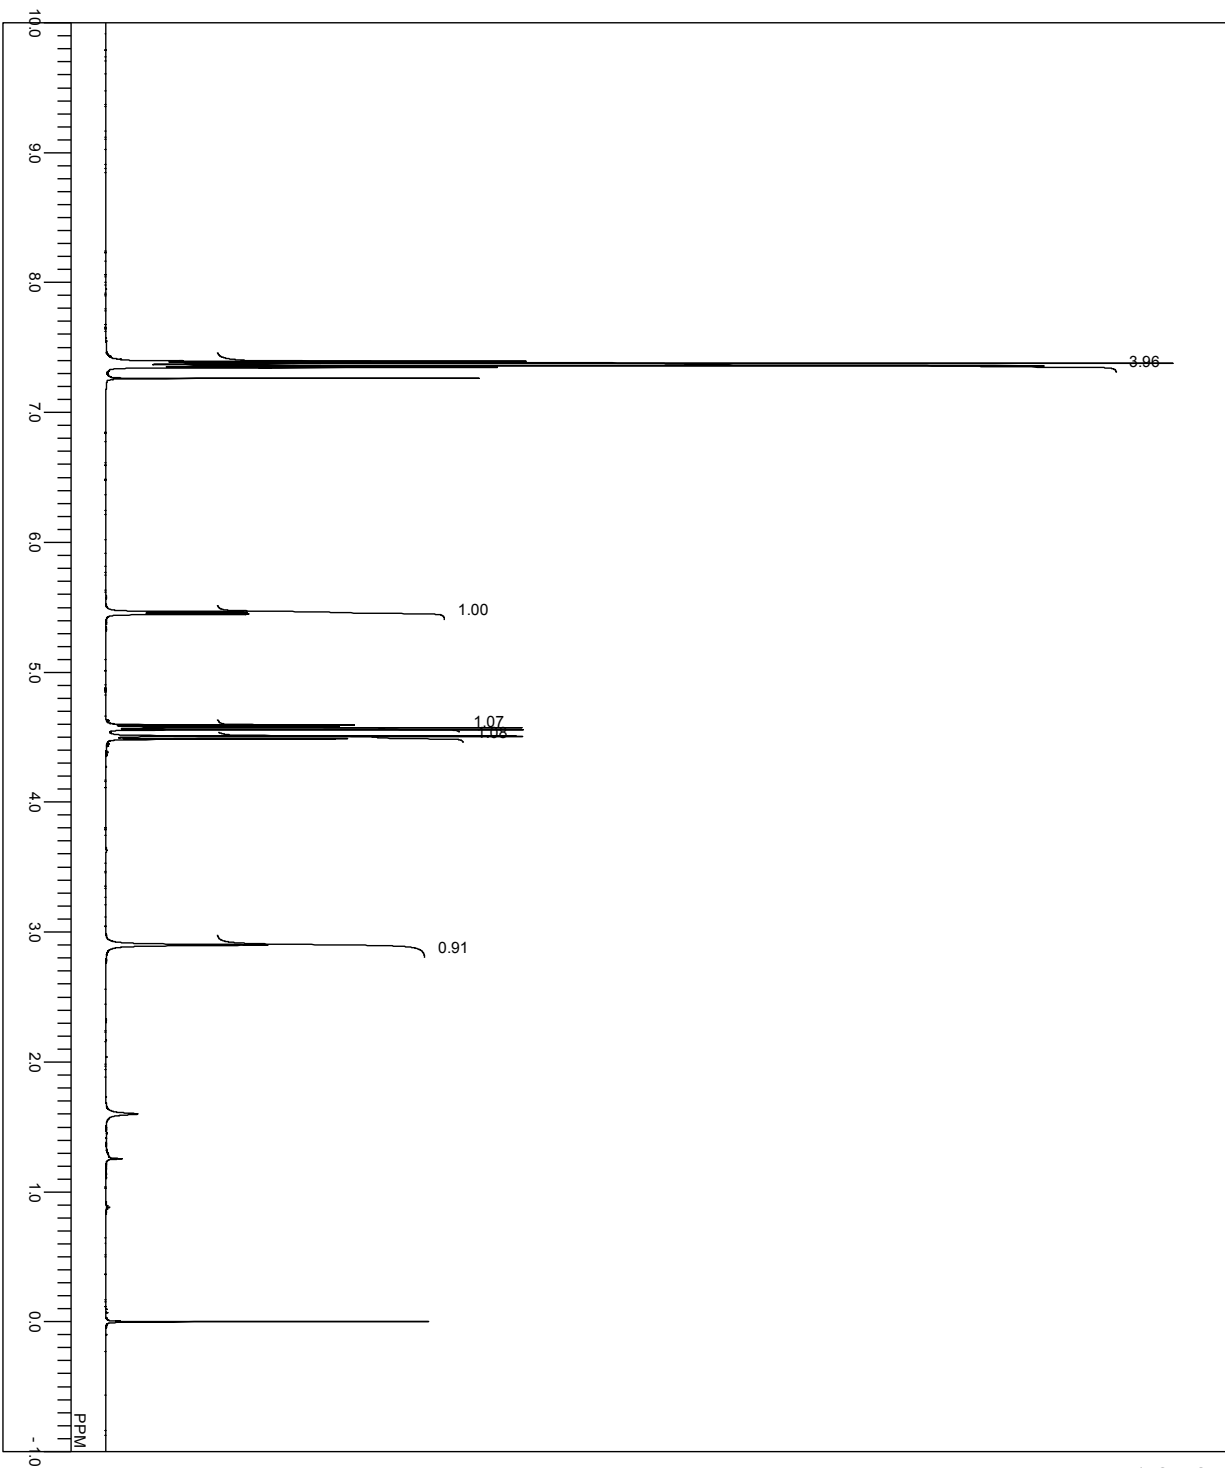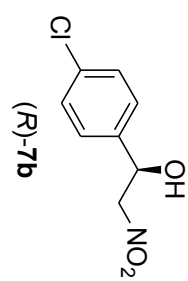

ORNUC  
EXMOD  
OBFRQ  
SILVNT  
EXREF

<sup>1</sup>H  
single pulse ex2  
600.17 MHz  
CDCl3  
0.00 ppm

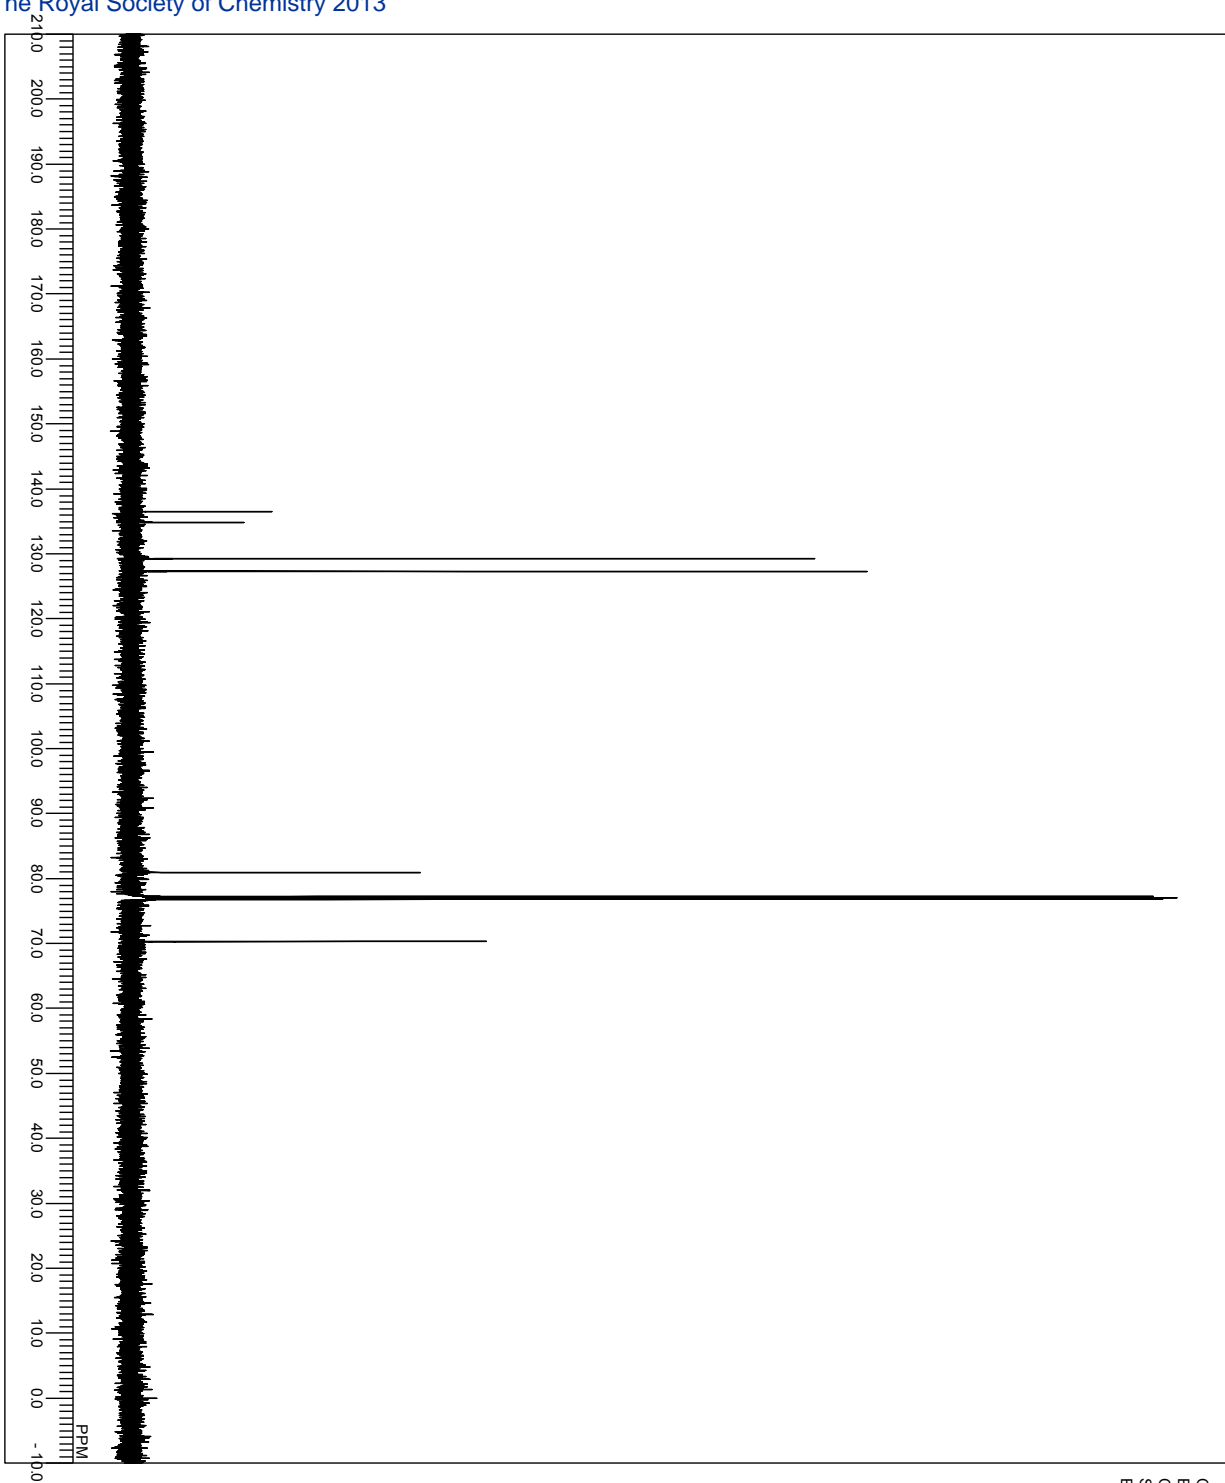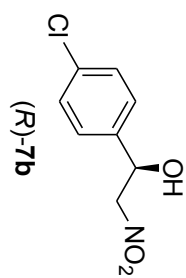

OBNUC 13C  
EXMOD single\_pulse\_dec  
OBFRQ 150.92 MHz  
SOLVT CDCL3  
EXREF 77.00 ppm

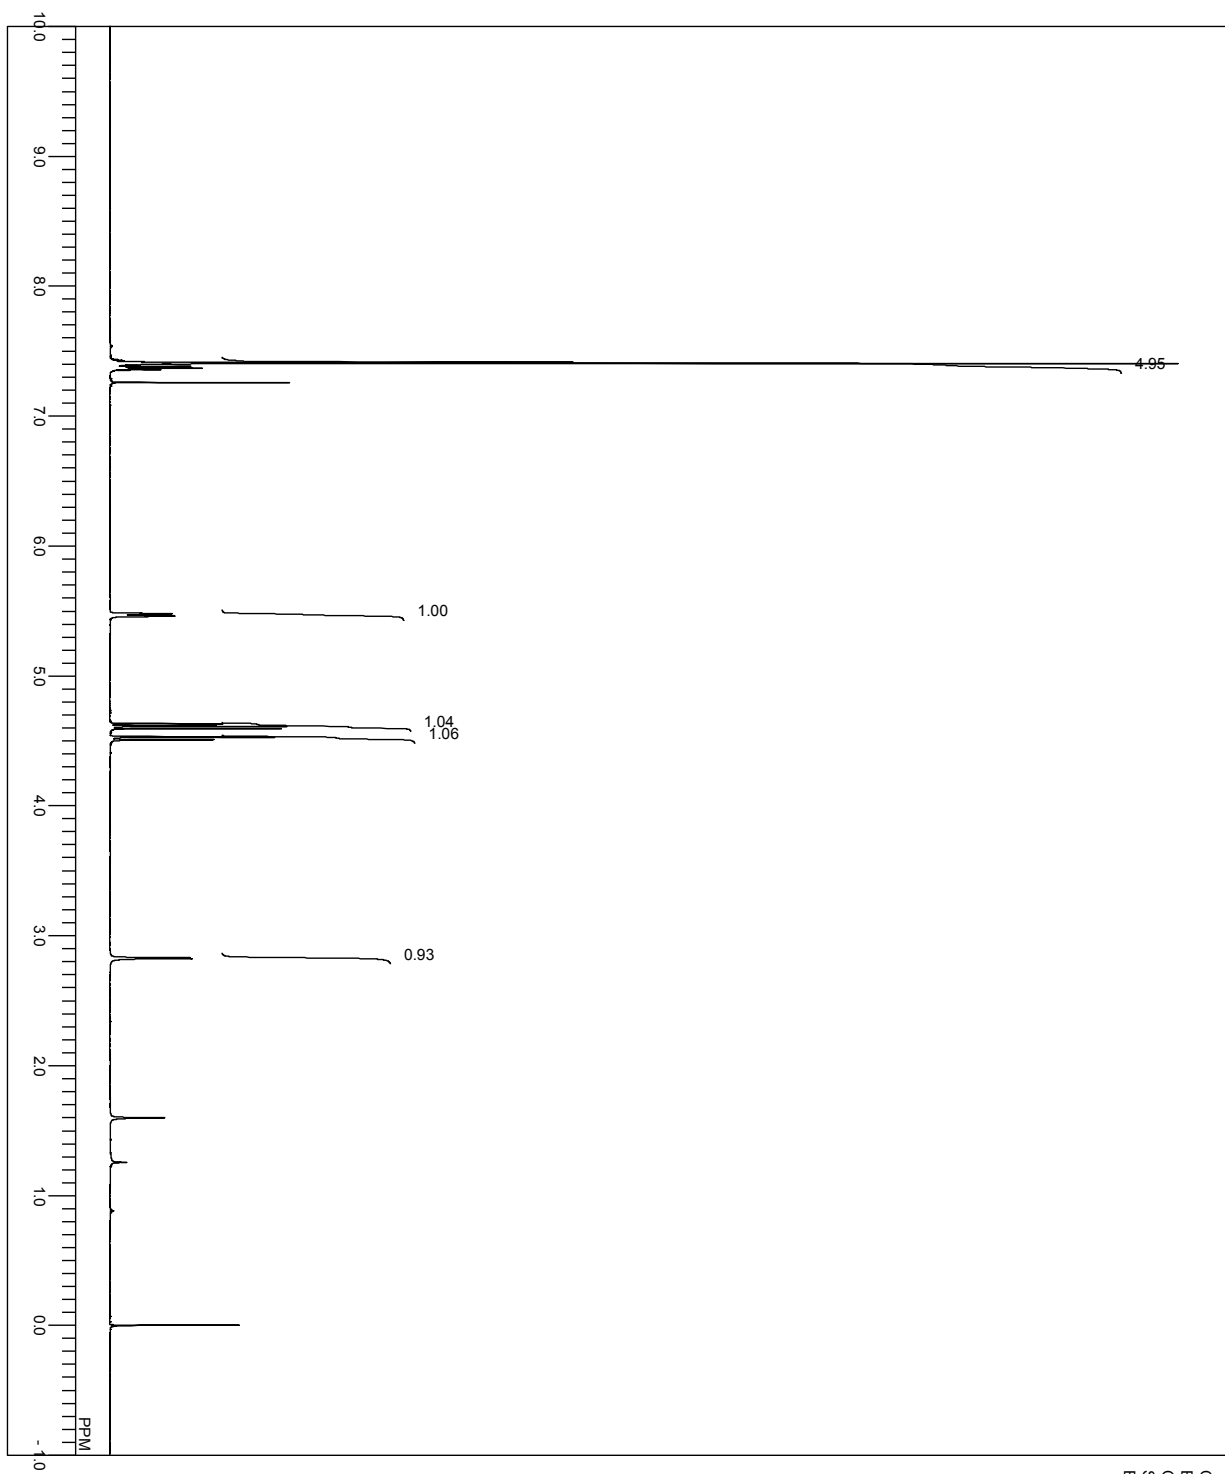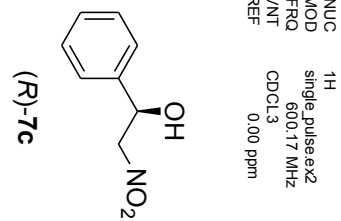

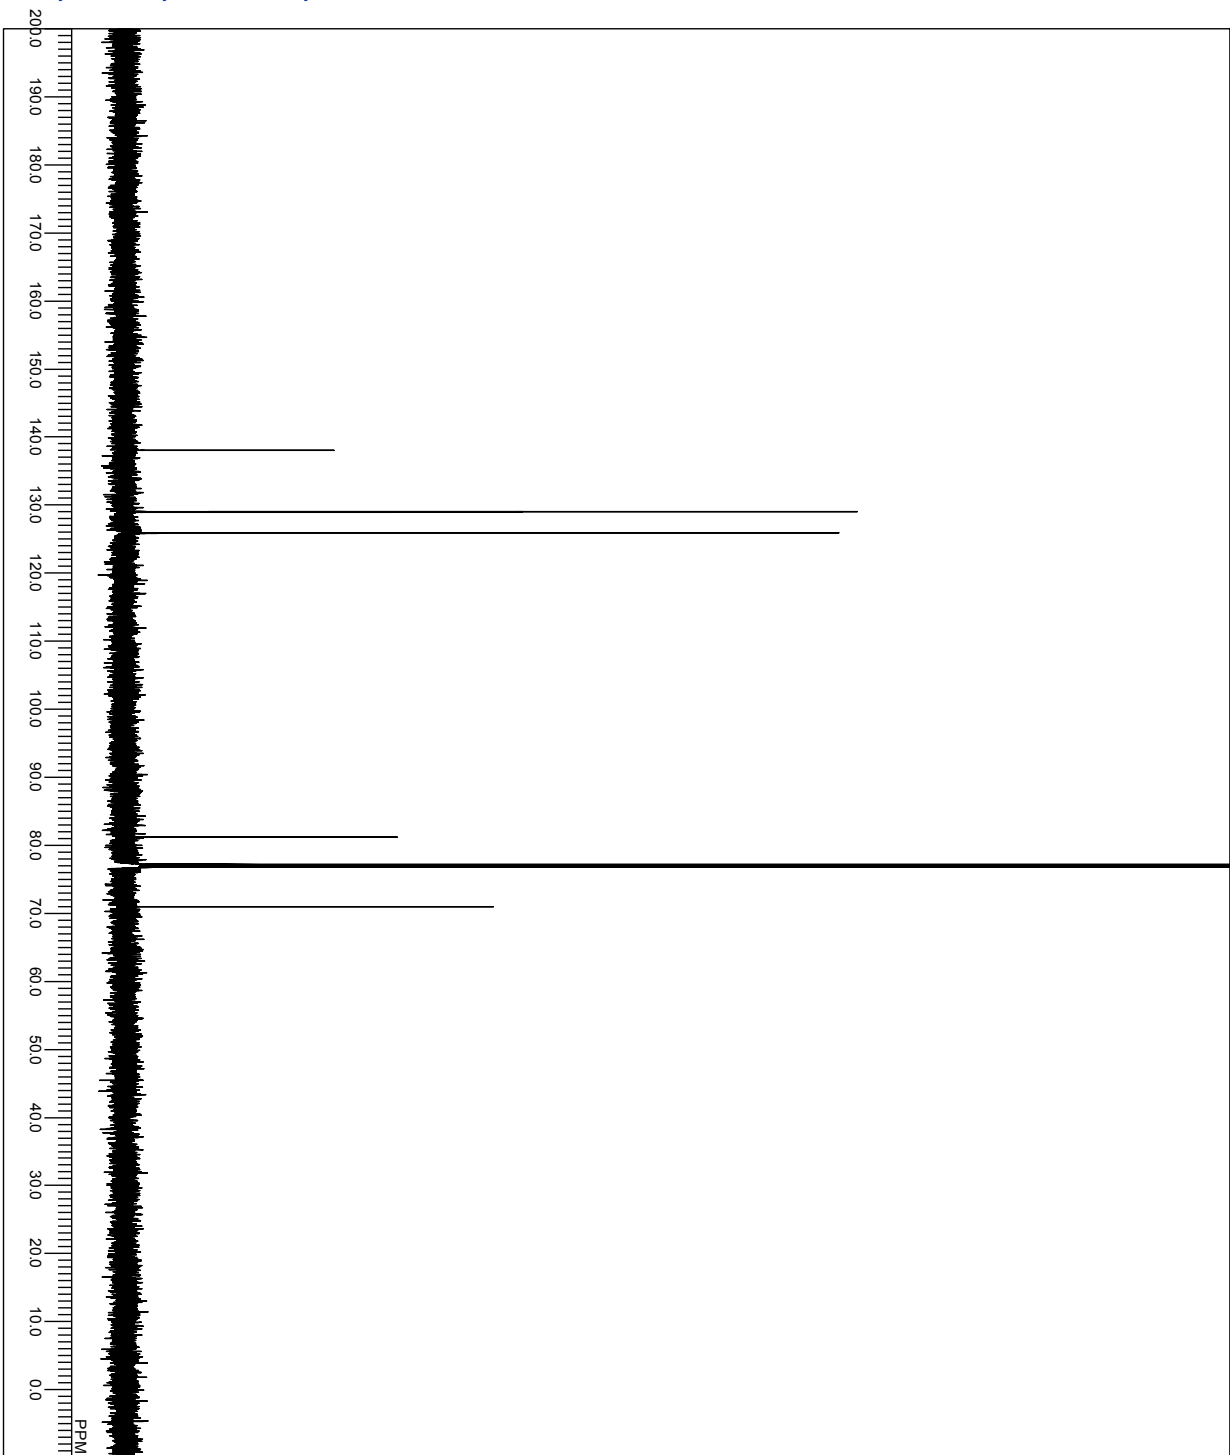

OBNUC 13C  
EXMOD single pulse dec  
OBFRQ 150.92 MHz  
SIVNT CDCl<sub>3</sub>  
EKREF 77.00 ppm

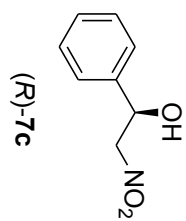

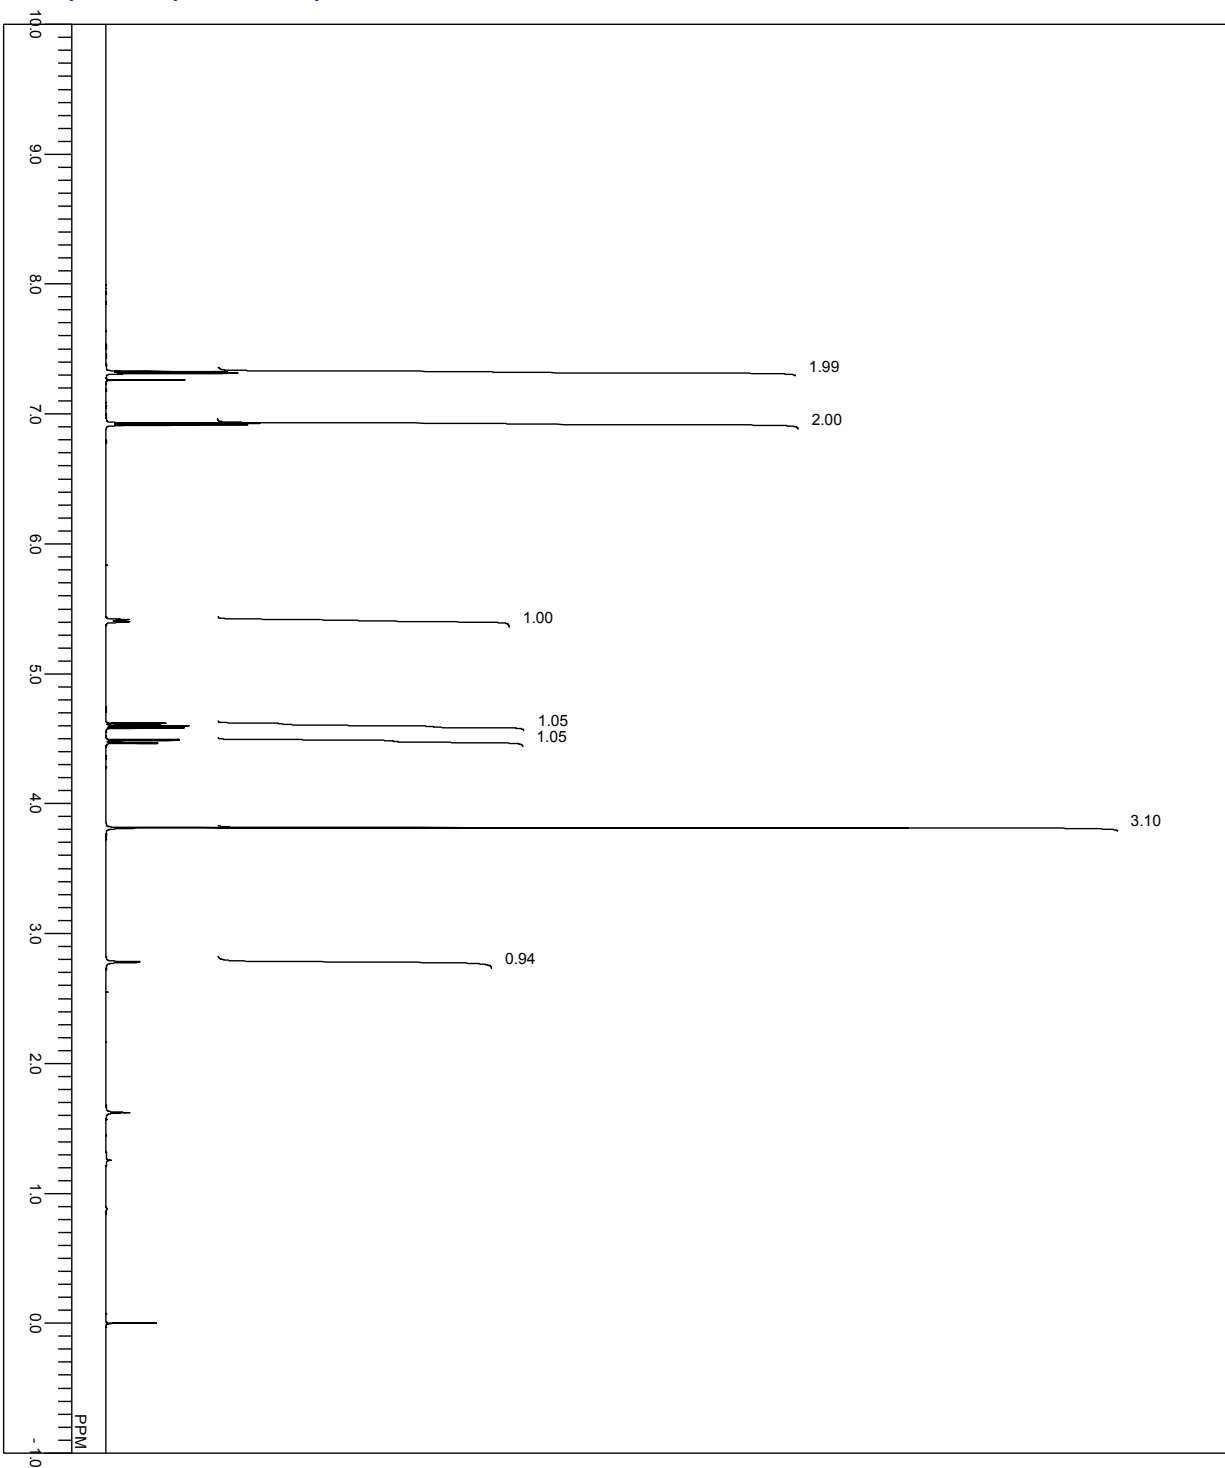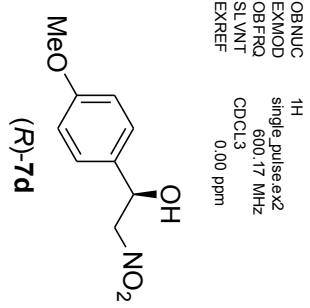



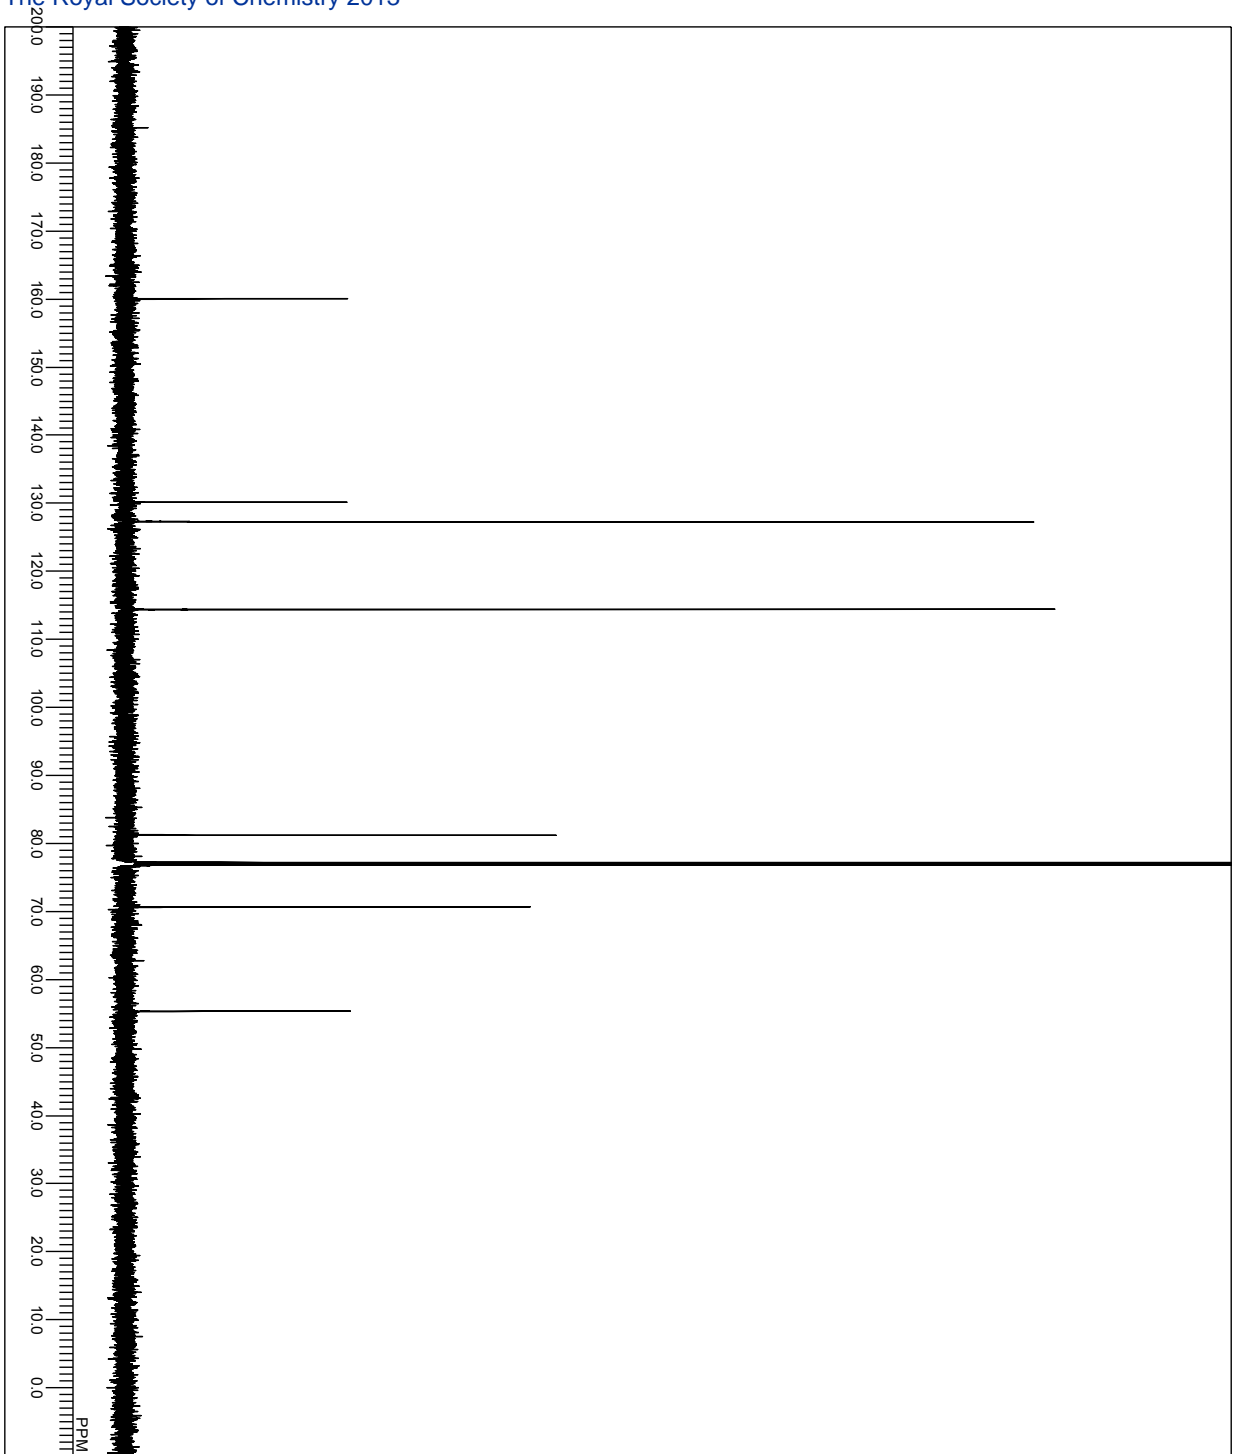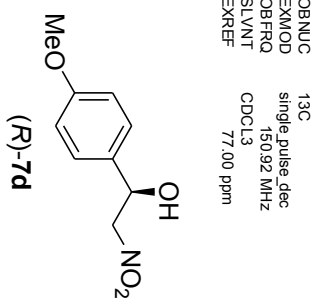

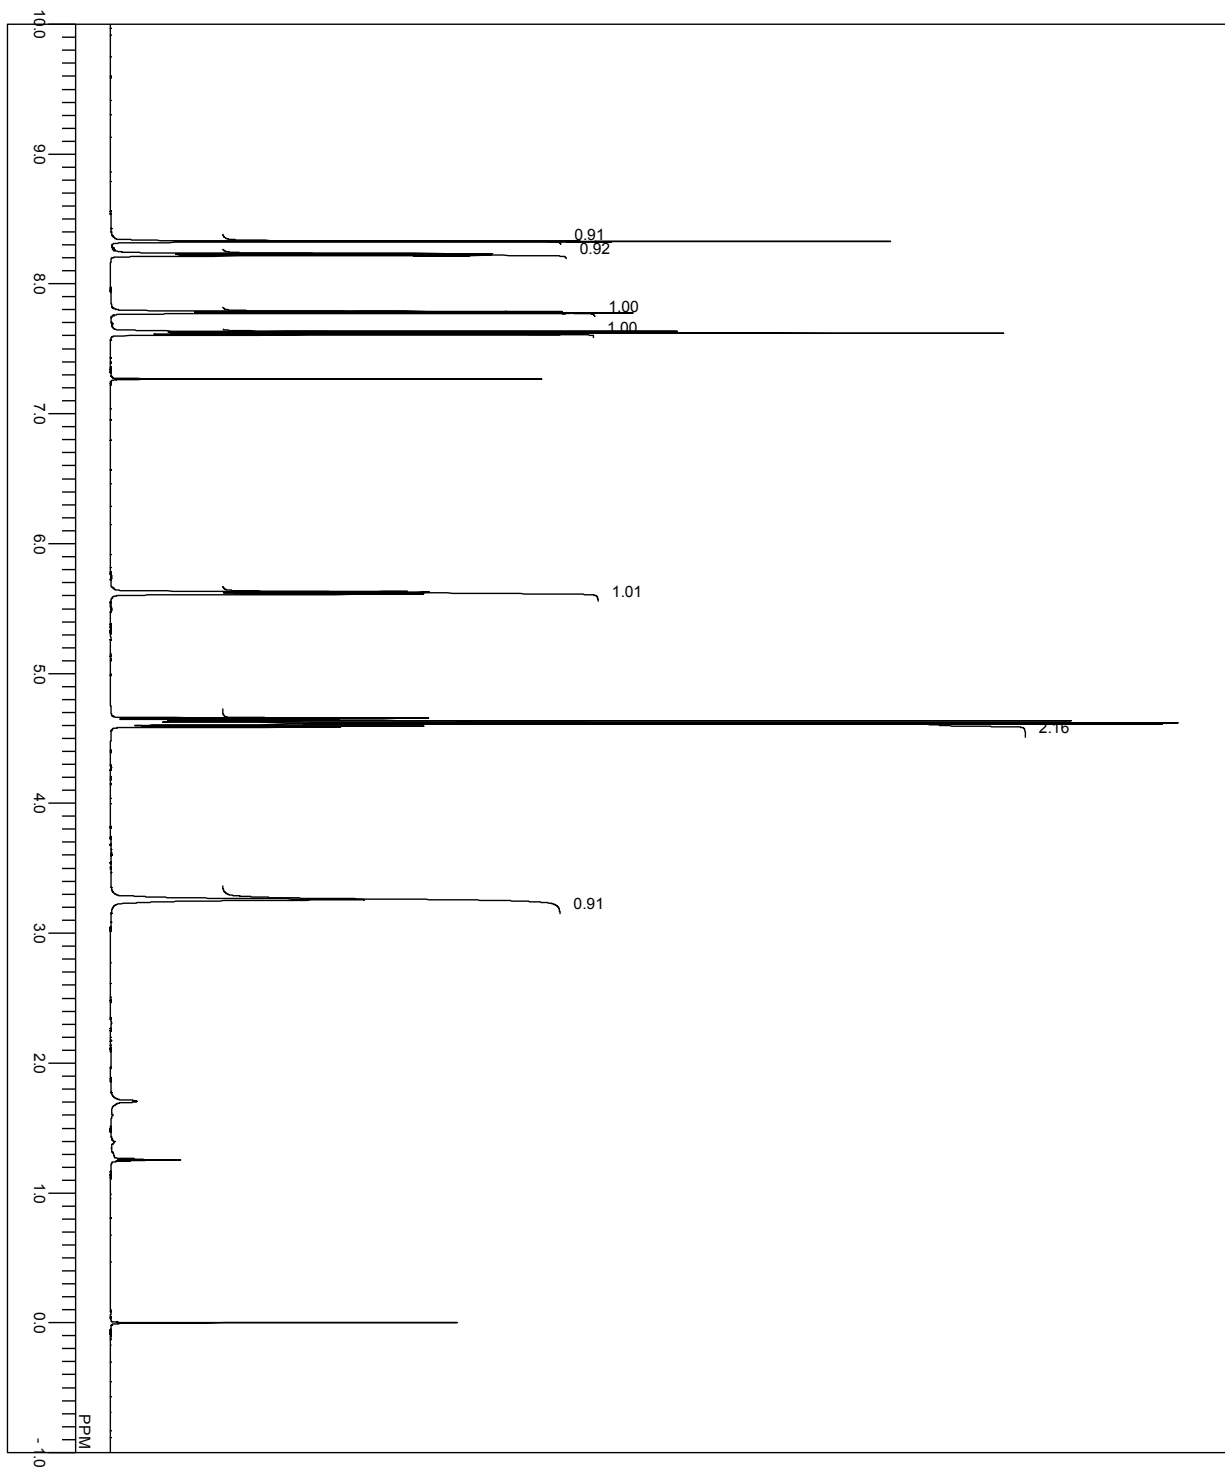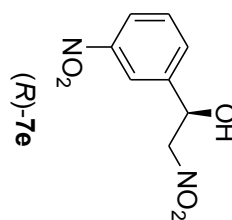

ORNLUC 1H  
EXMOD single\_pulse\_ex2  
OBFRQ 600.17 MHz  
SLVNT CDCL3  
EXREF 0.00 ppm

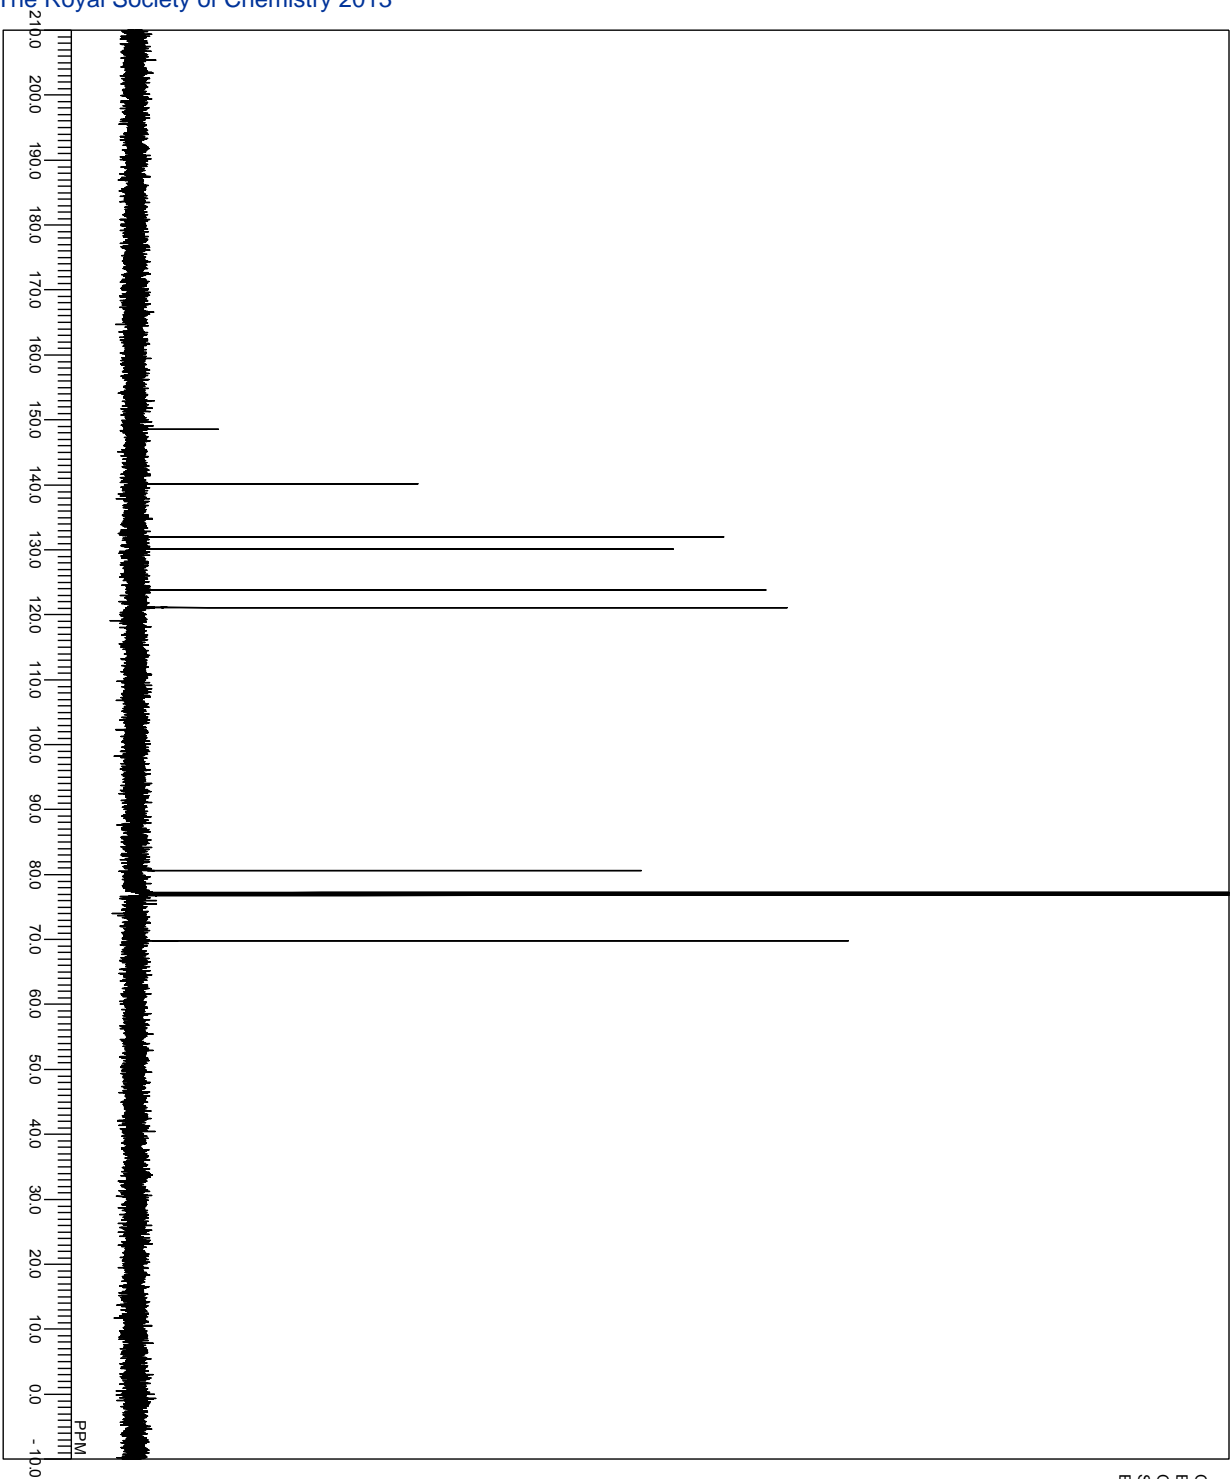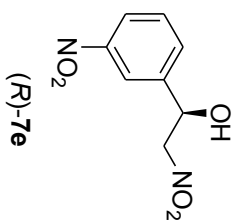

OBNUC 13C  
EXMOD single-pulse dec  
OBFRQ 150.92 MHz  
SLVNT CDCL3  
EXREF 77.00 ppm

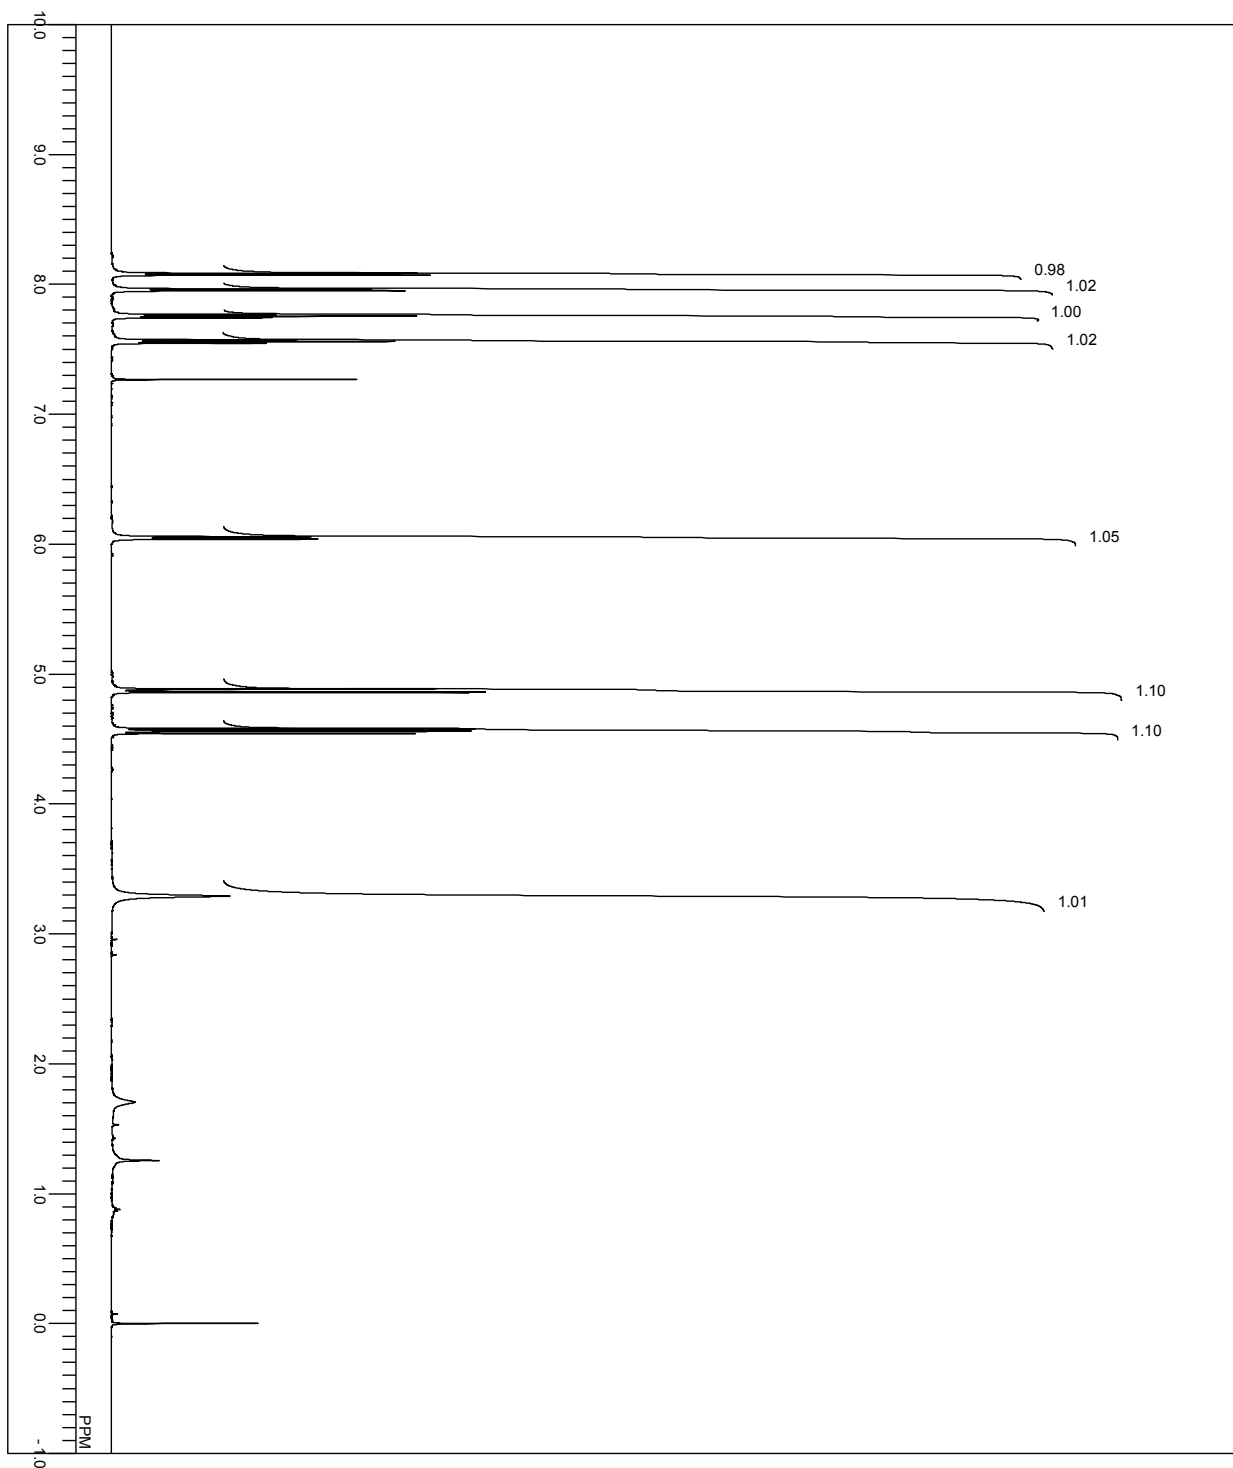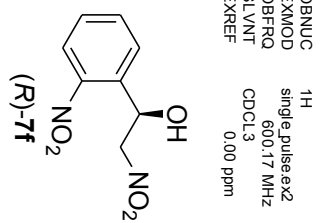

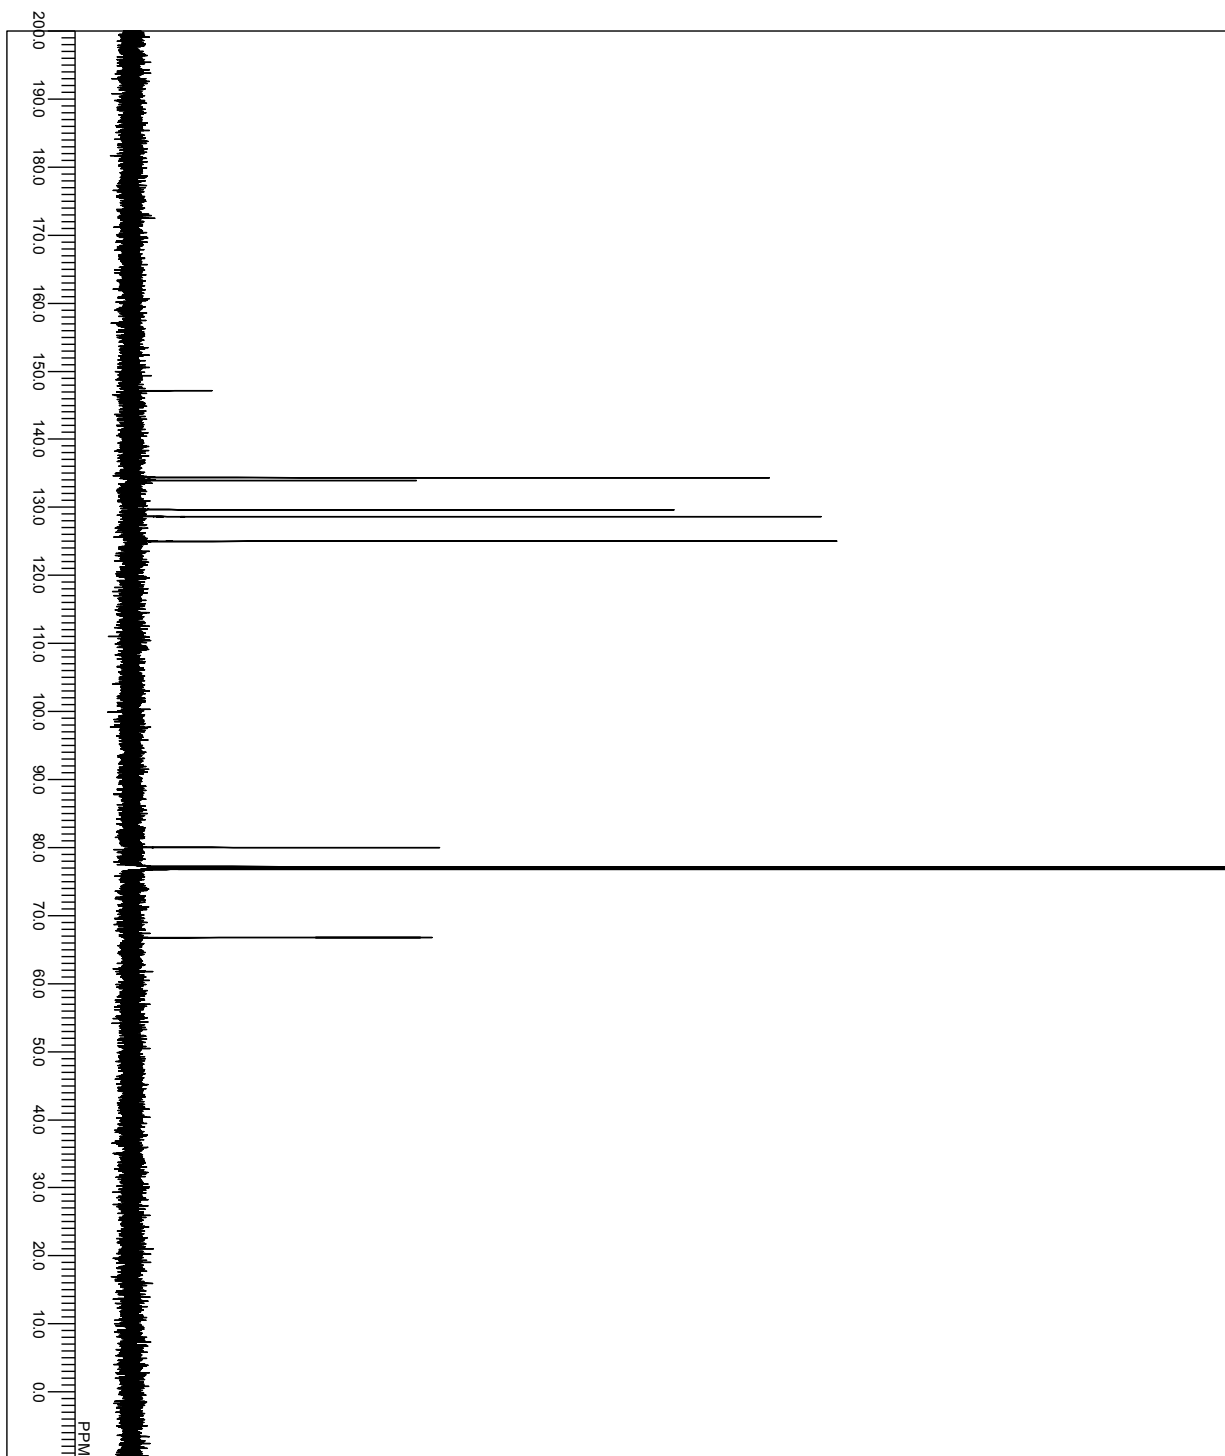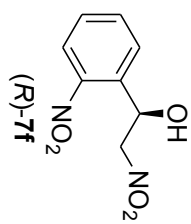

OBNUC 13C  
EXM10D single pulse dec  
OBFRQ 150.92 MHz  
SLVNT CDCL3  
EXREF 77.00 ppm

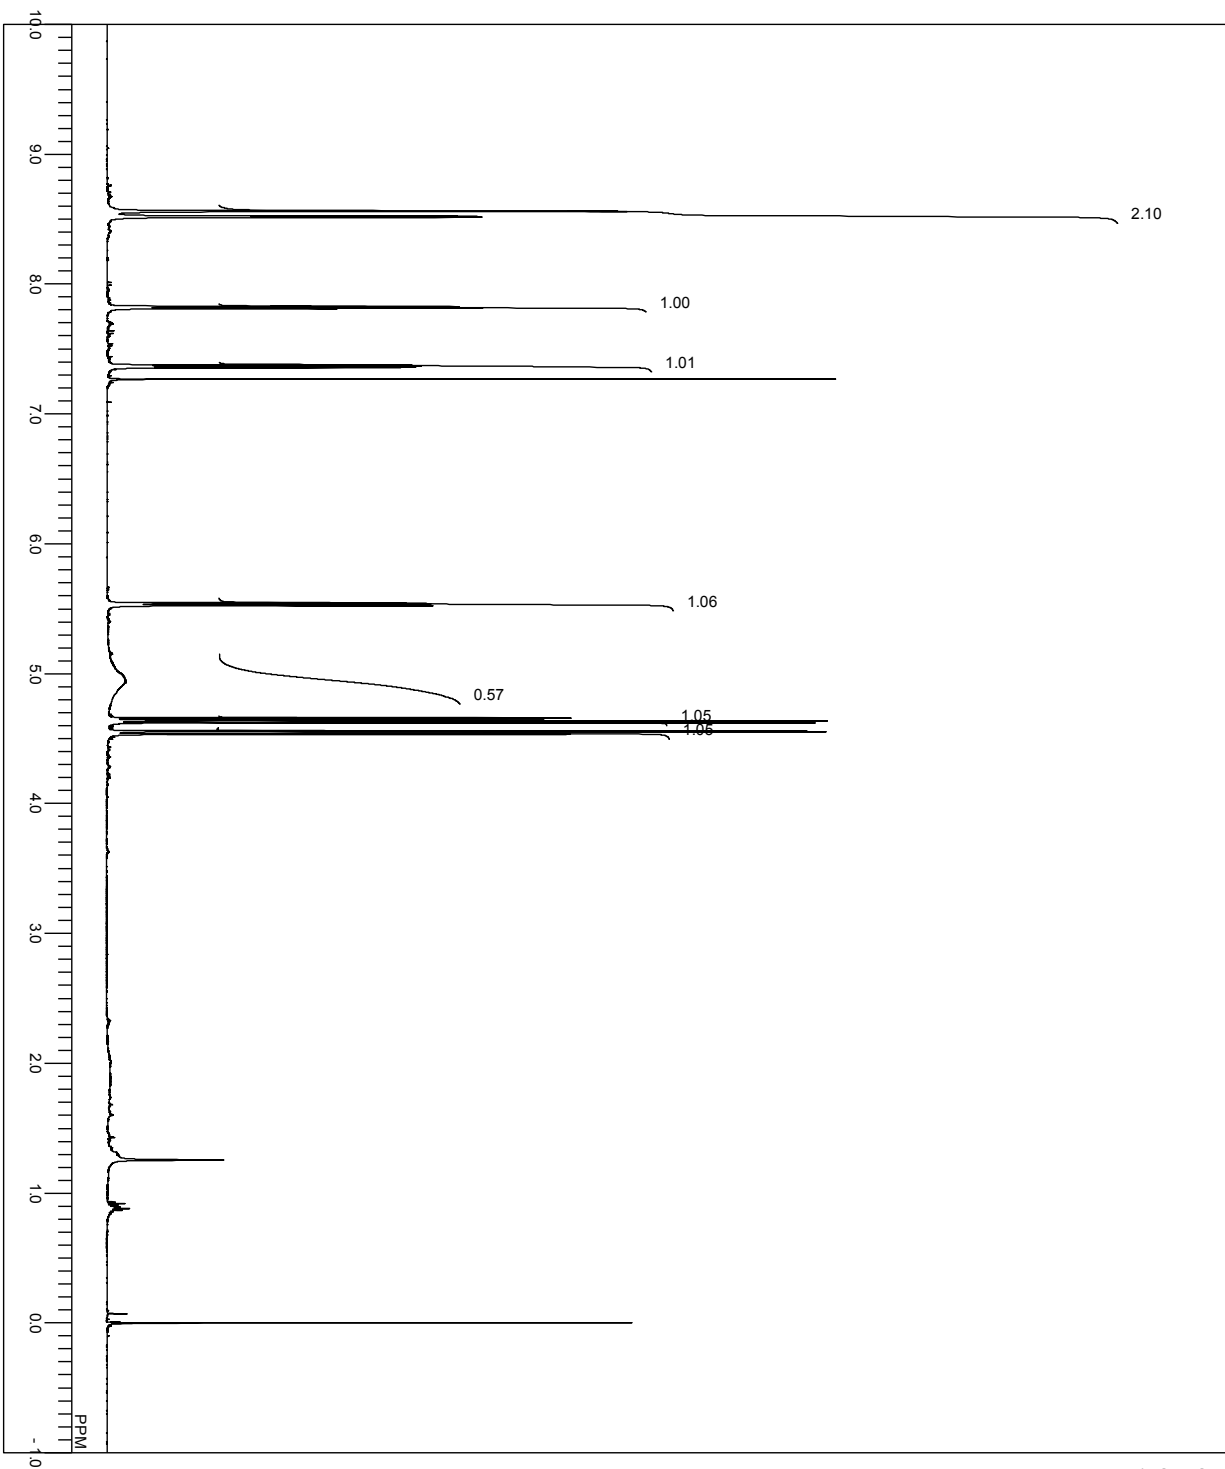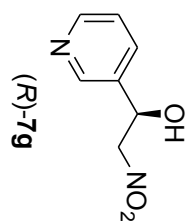

ORNUC <sup>1</sup>H  
EXMOD single pulse ex2  
OBFRQ 600.17 MHz  
SOLVENT CDCl<sub>3</sub>  
EXREF 0.00 ppm

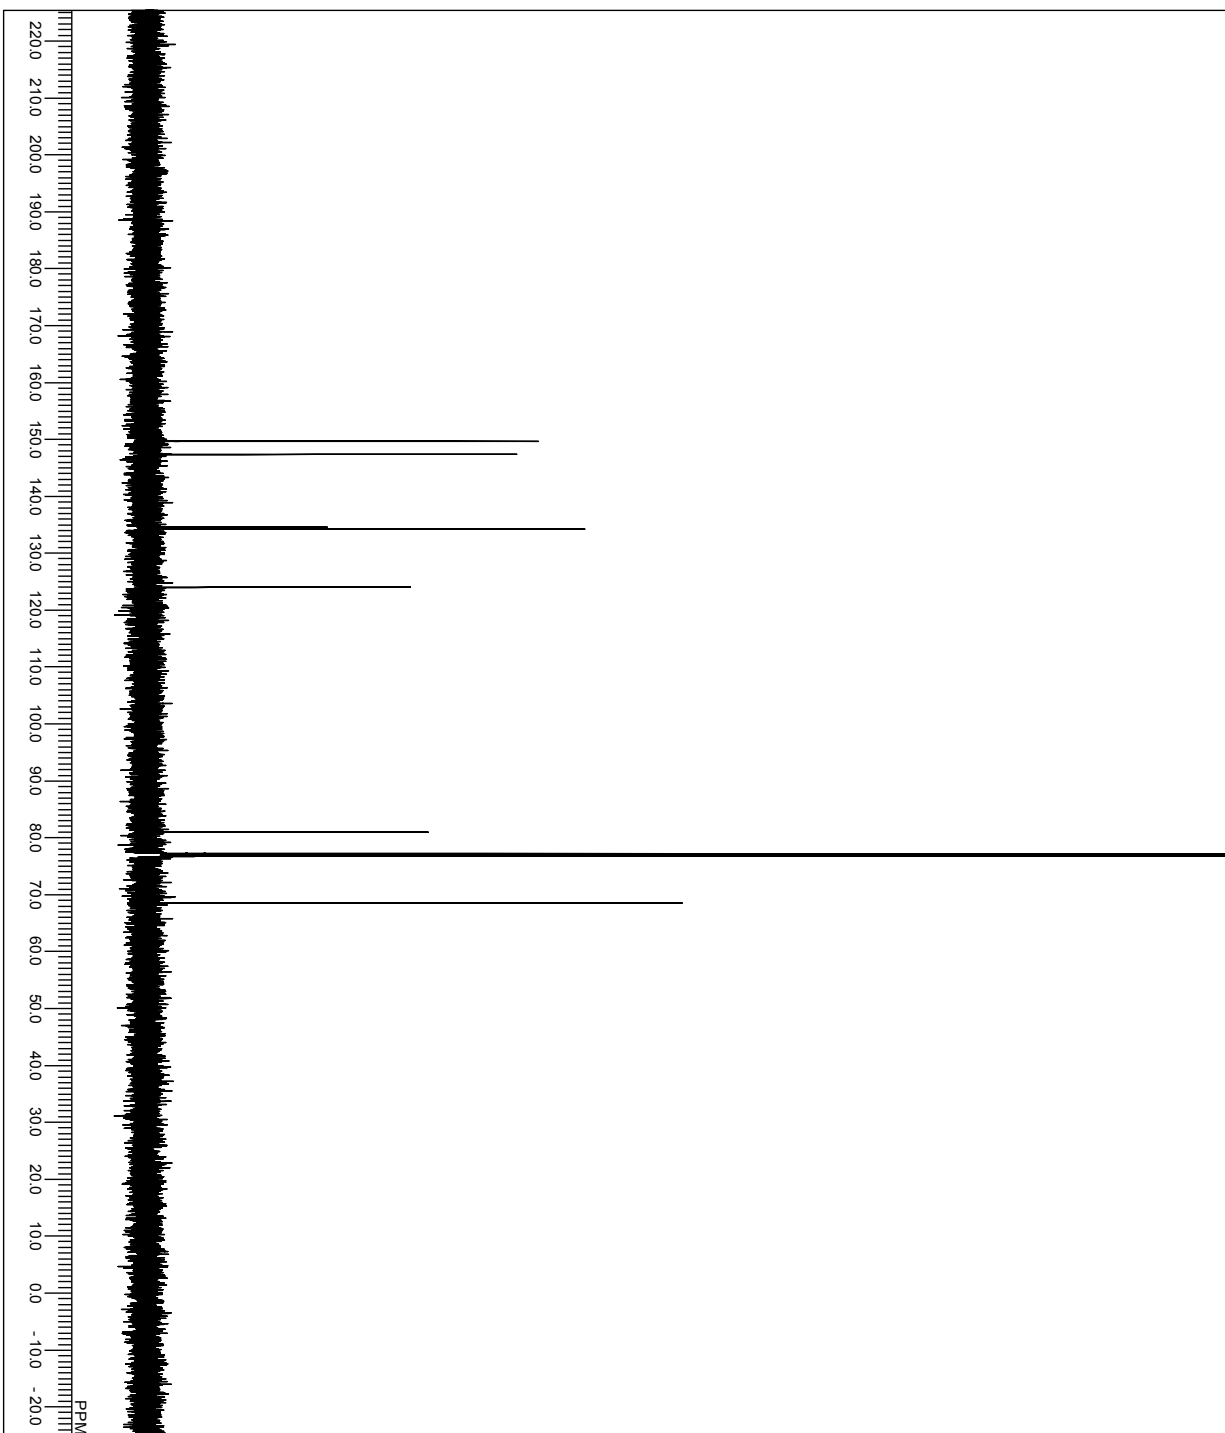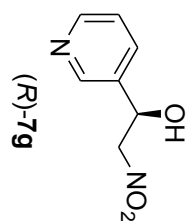

OBNUC <sup>13</sup>C  
EXMOD single\_pulse\_glec  
OBFRQ 150.92 MHz  
SOLVENT CDCl<sub>3</sub>  
EXREF 77.00 ppm

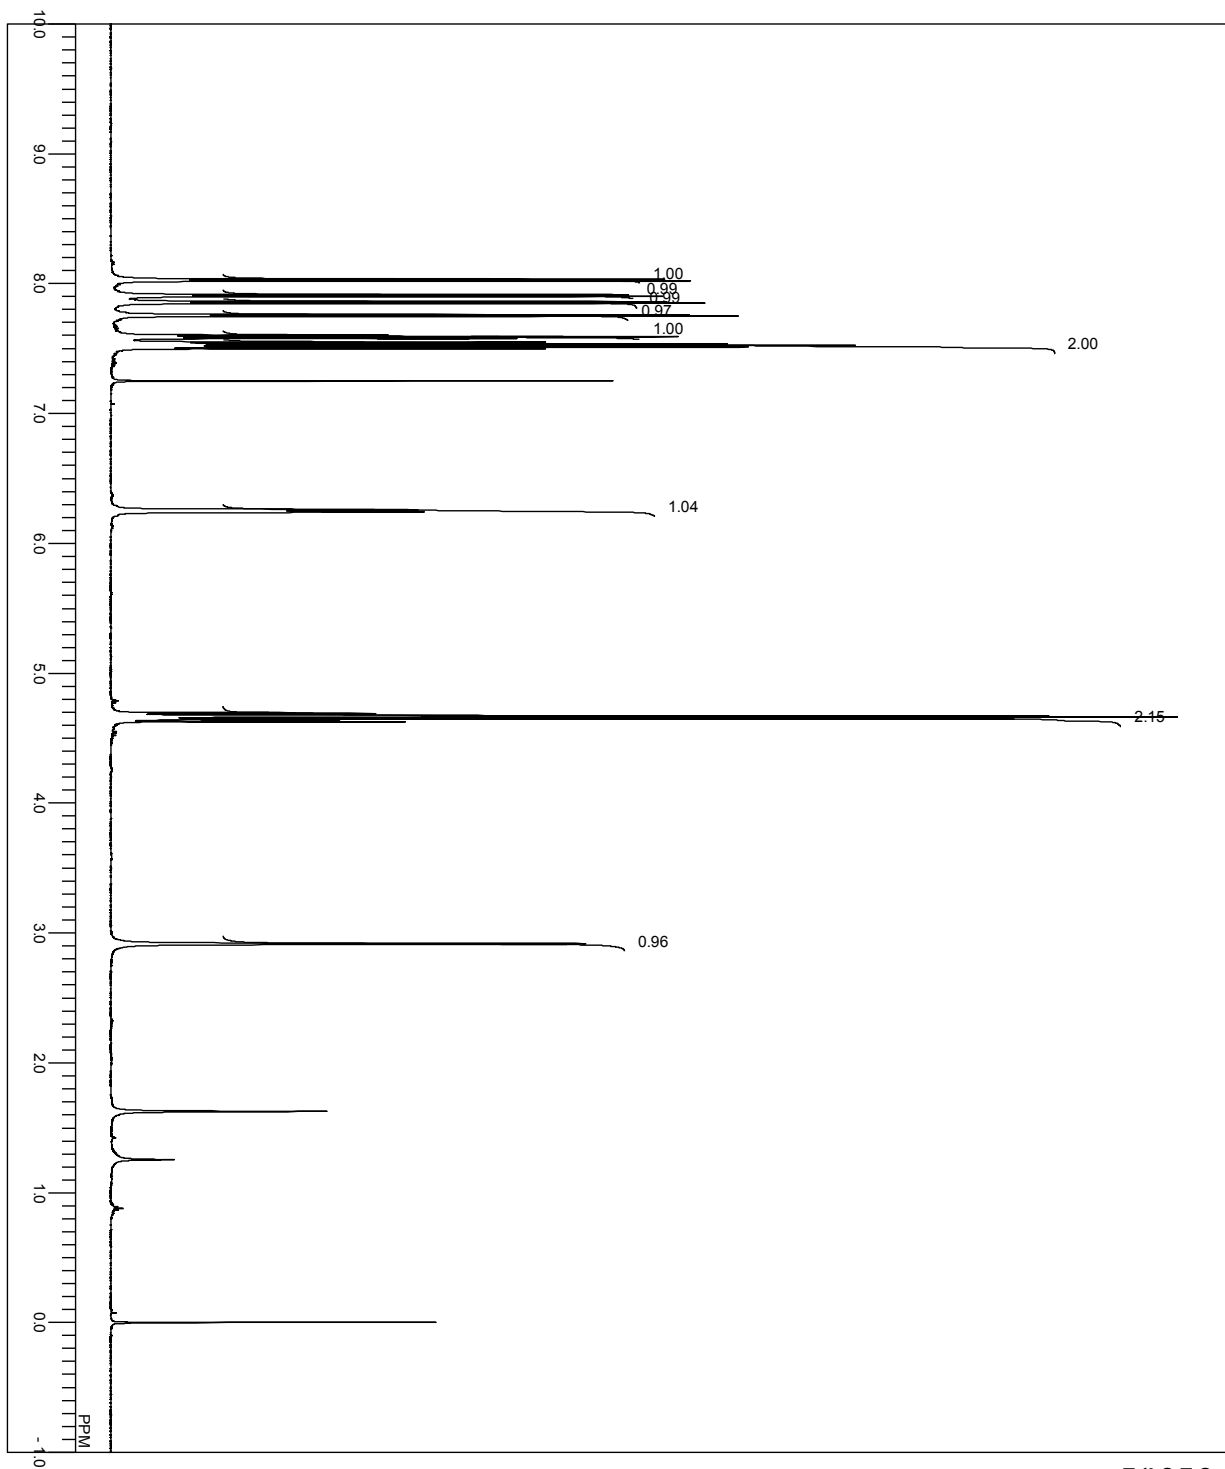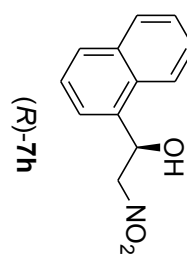

OBNUC 1H  
EXWID single\_pulse\_x2  
OBFRO 600.17 MHz  
SLVNT CDCL3  
EXREF 0.00 ppm



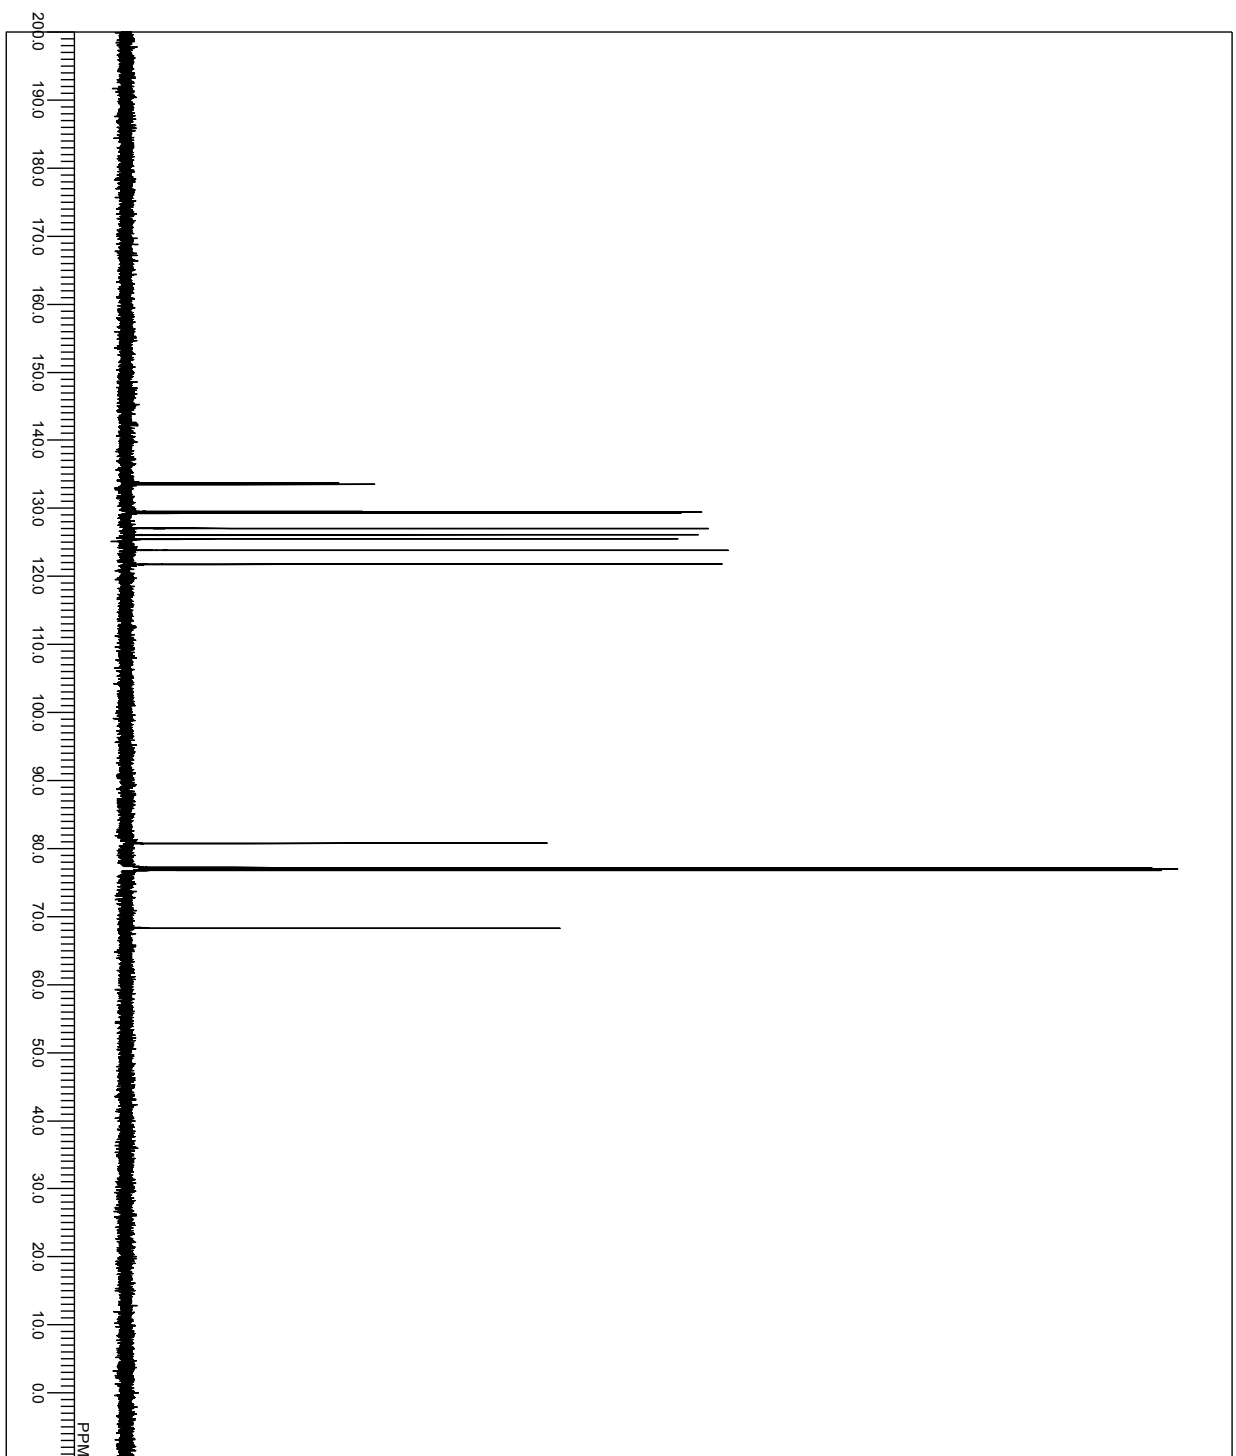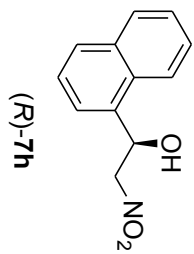

OBNUC 13C  
EXMOD single pulse dec  
OBFRQ 150.92 MHz  
SLVNT CDCL3  
EXREF 77.00 ppm

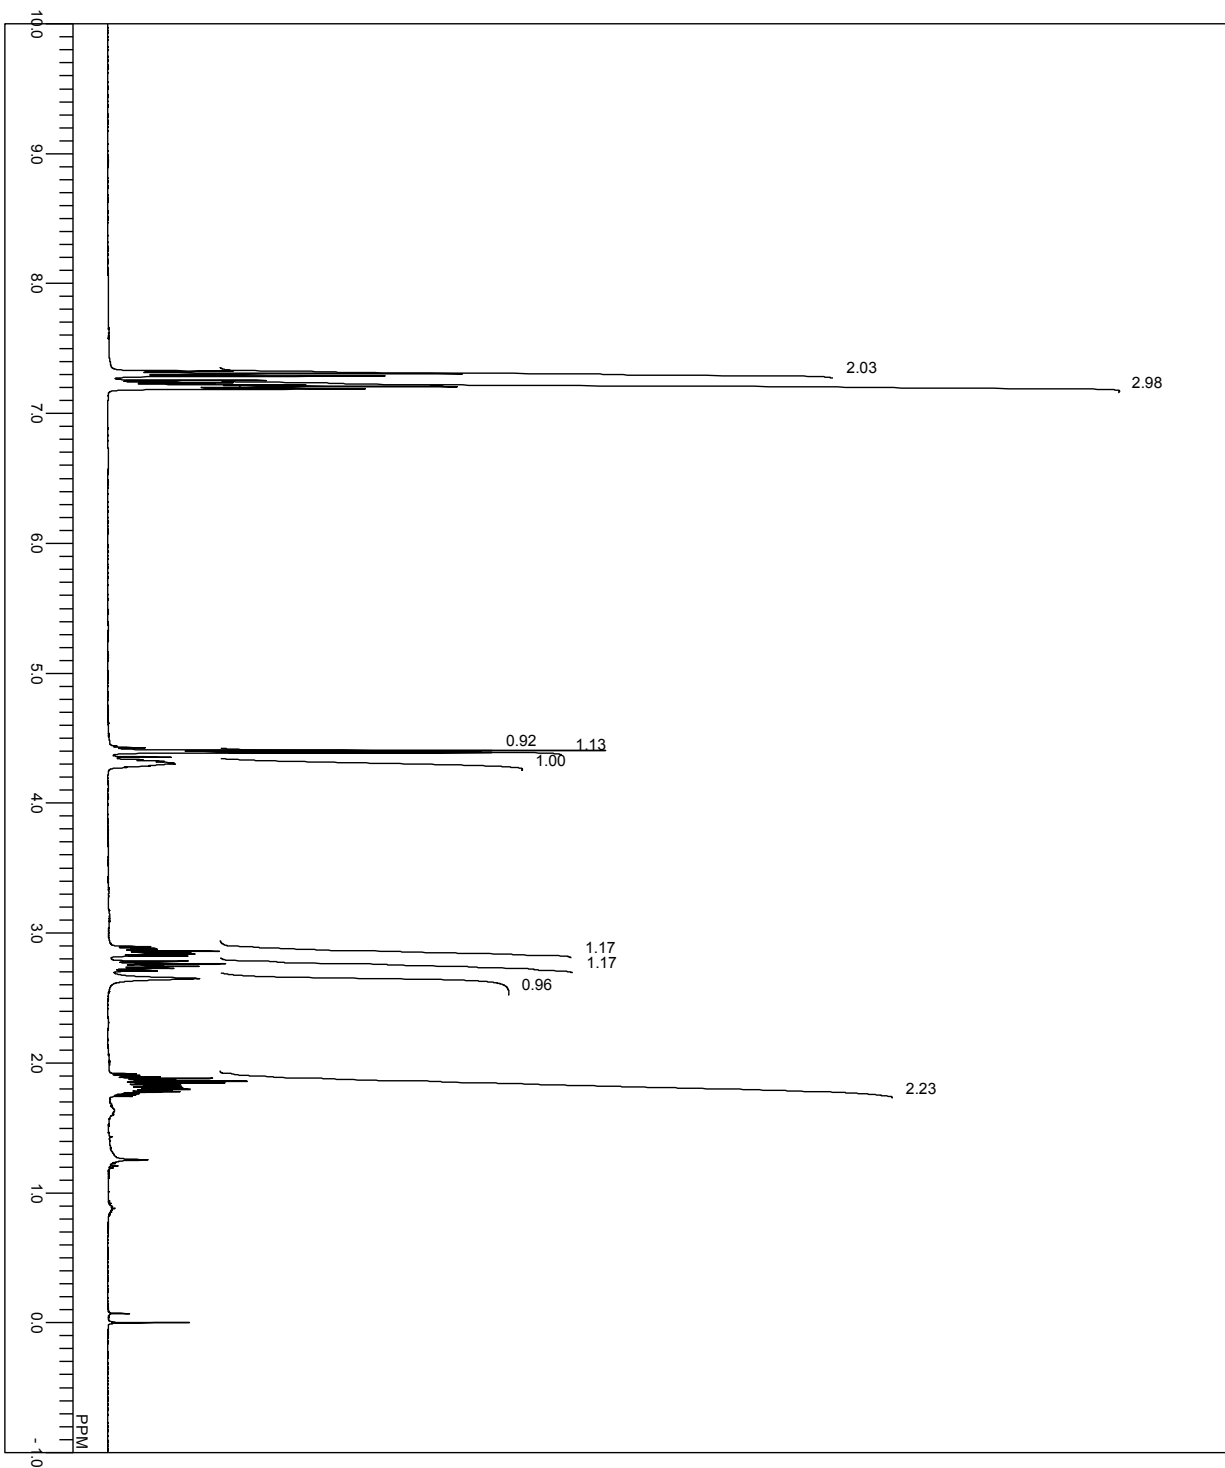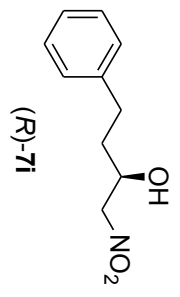

ORNUC  
EXMOD single\_pulse\_ex2  
OBFRQ 399.778 MHz  
SLVNT CDCL3  
EXREF 0.00 ppm

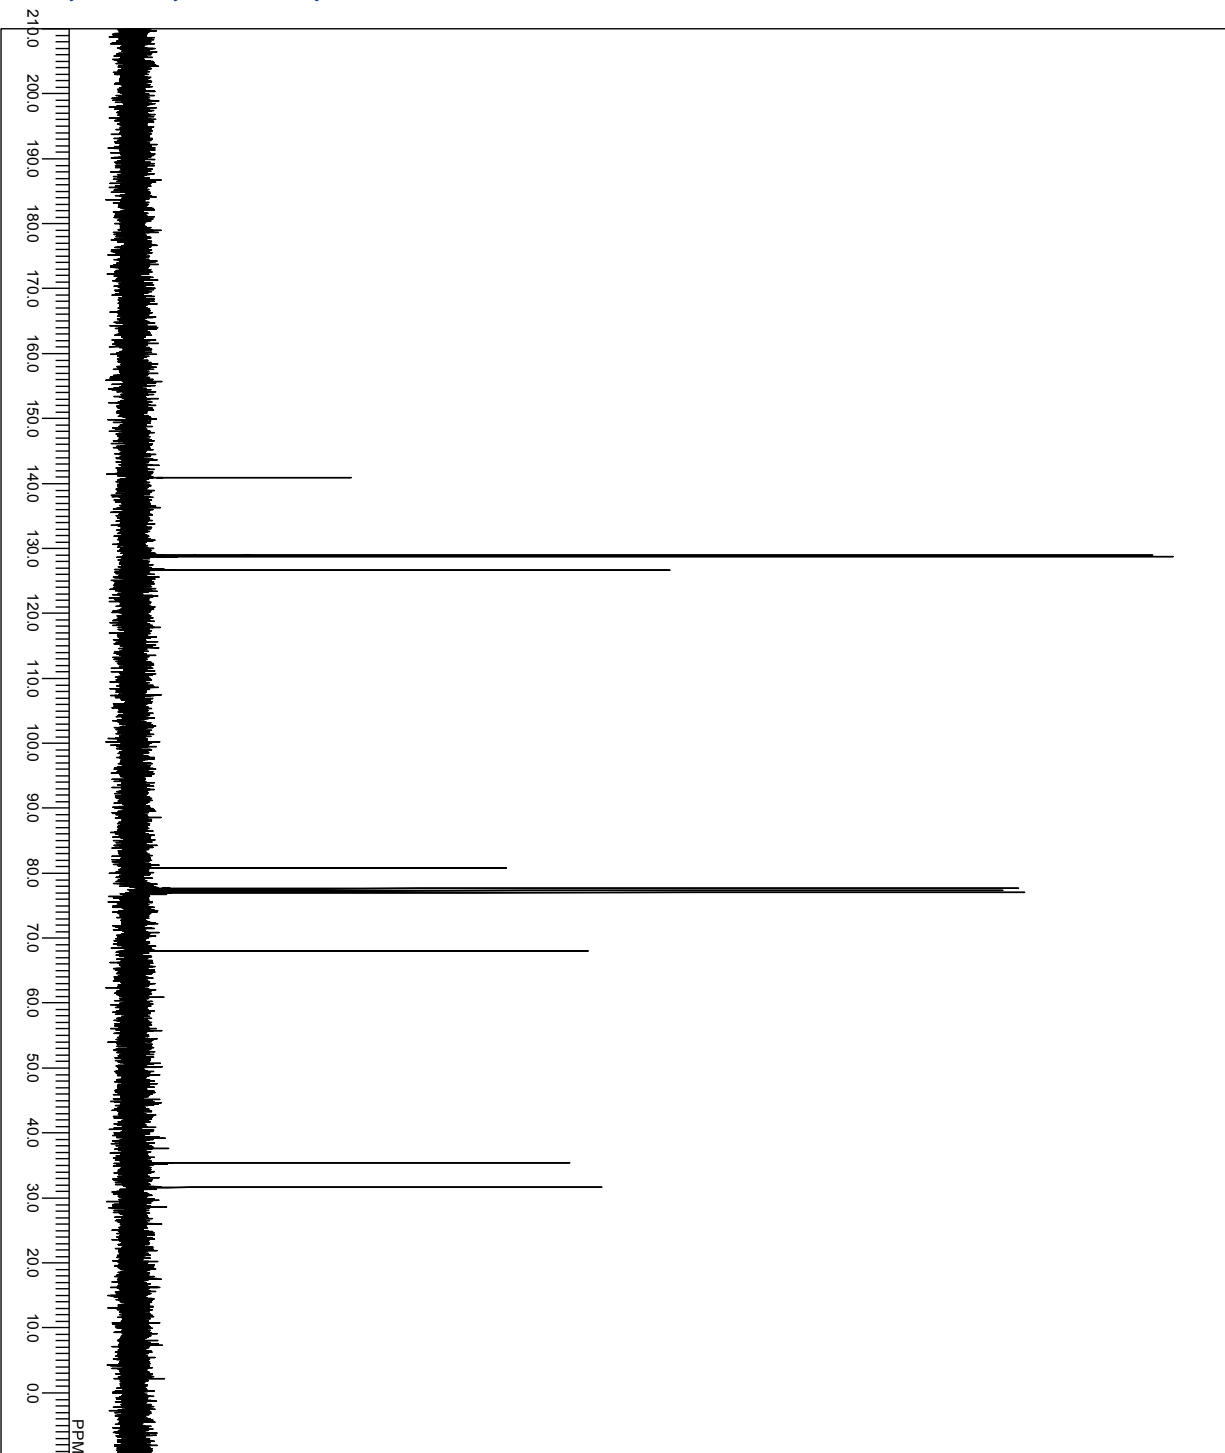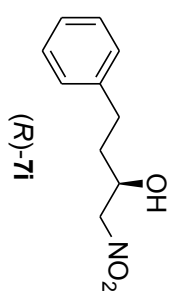

OBNUC 13C  
EXMOD single pulse dec  
OBFRC 100.53 MHz  
SIVNT CDCL3  
EKREF 77.00 ppm

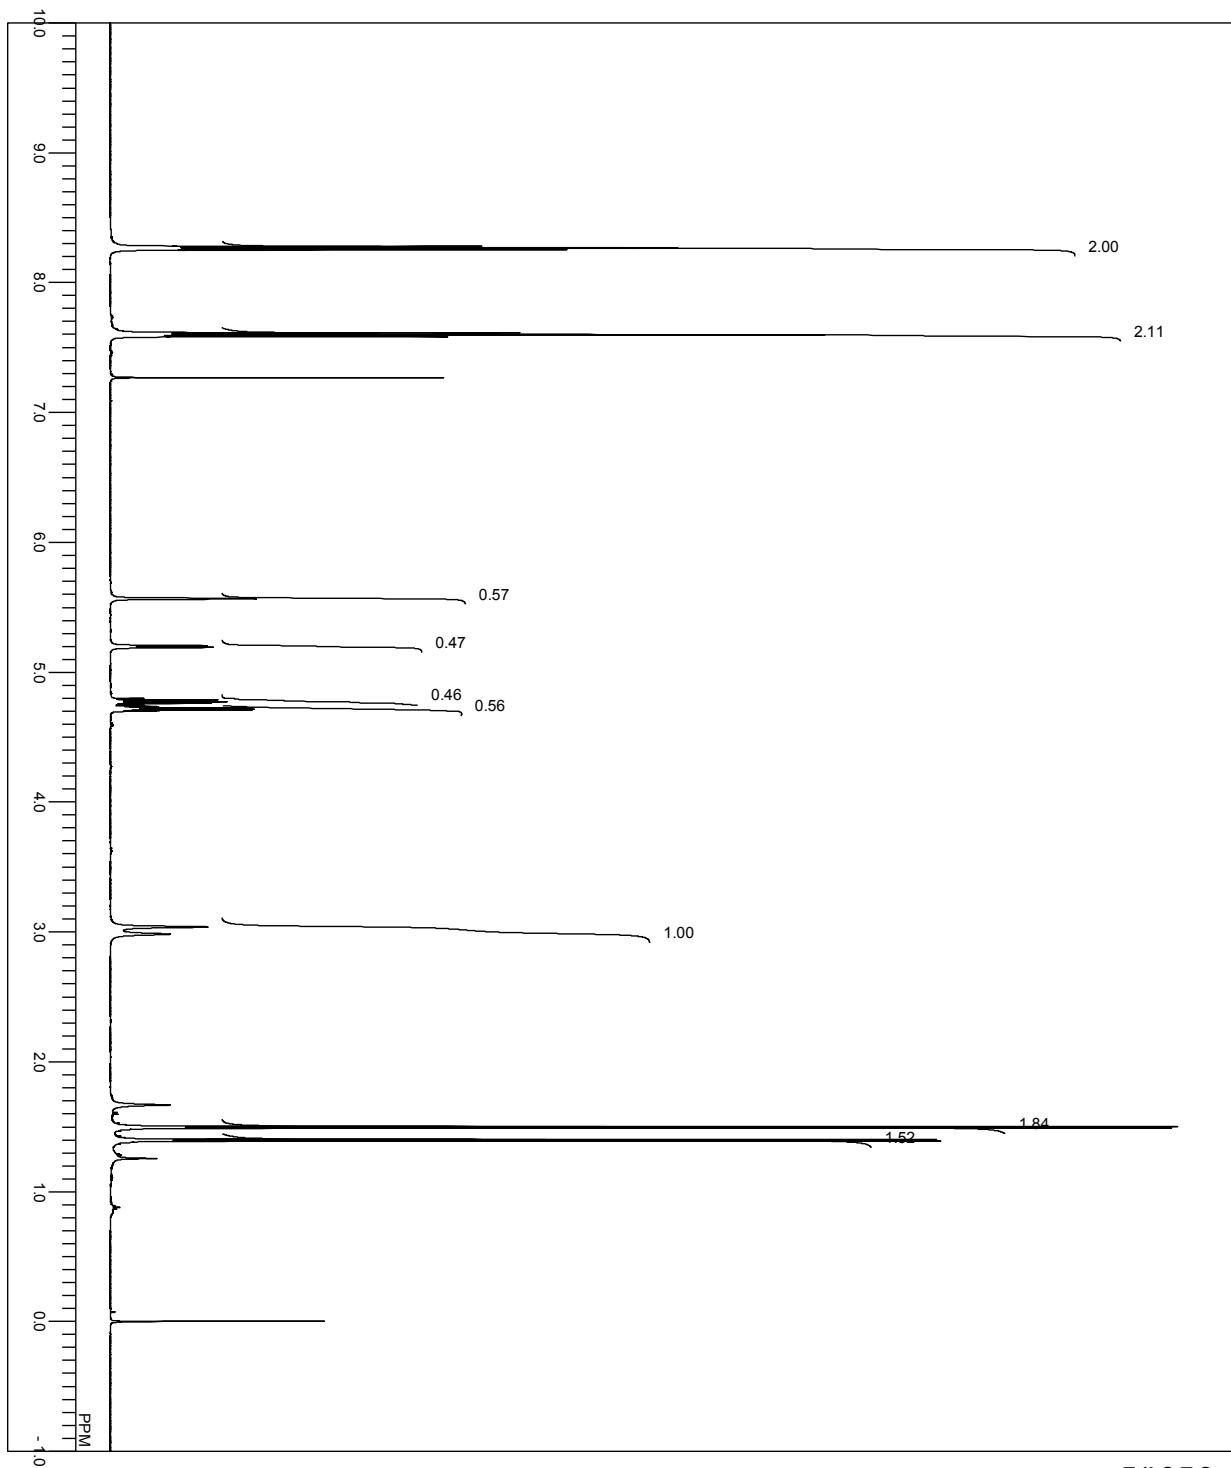

ORNUC 1H  
EXMOD single\_pulse\_x2  
OFPRO 600.17 MHz  
SLVNT CDCL3  
EXREF 0.00 ppm

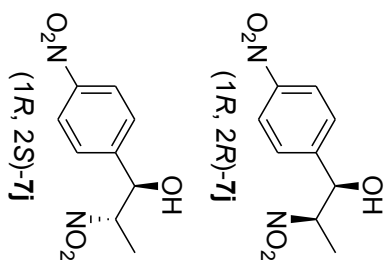

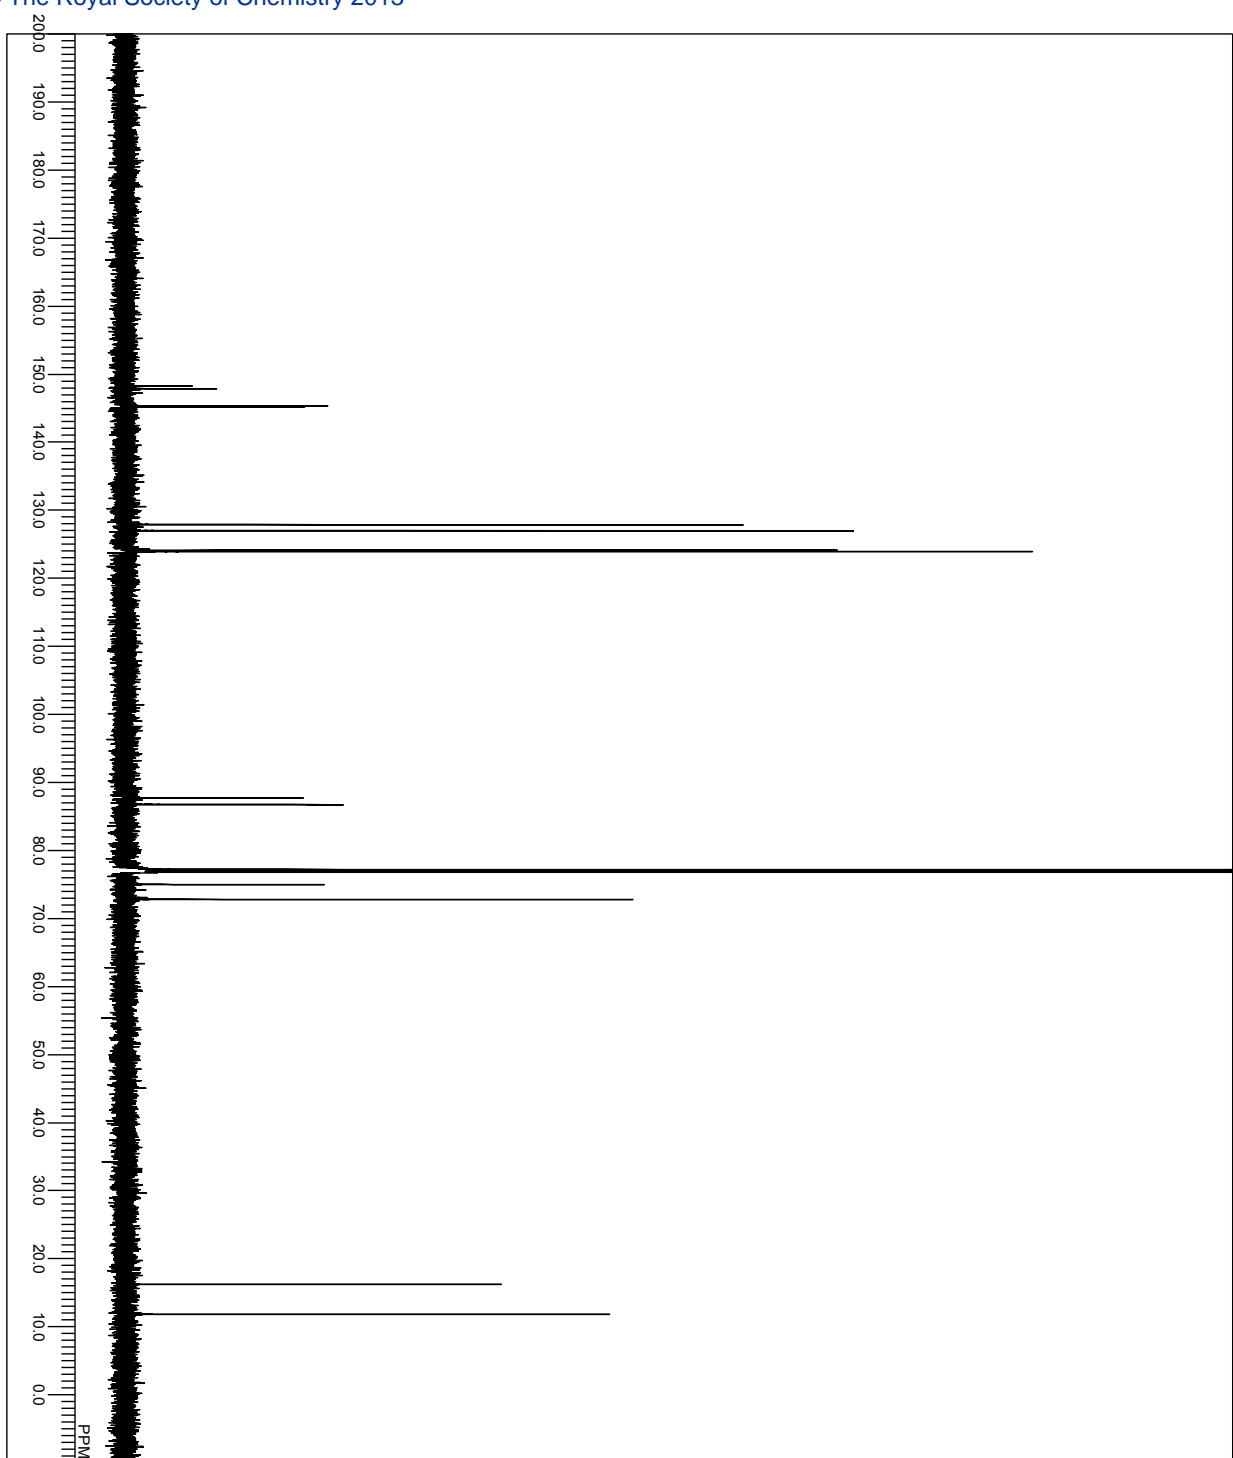

OBNUC <sup>13</sup>C  
EXM10D single pulse dec  
OBFRQ 150.92 MHz  
SLVNT CDCL3  
EXREF 77.00 ppm

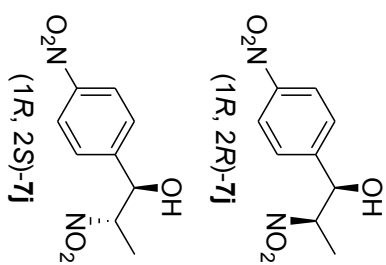

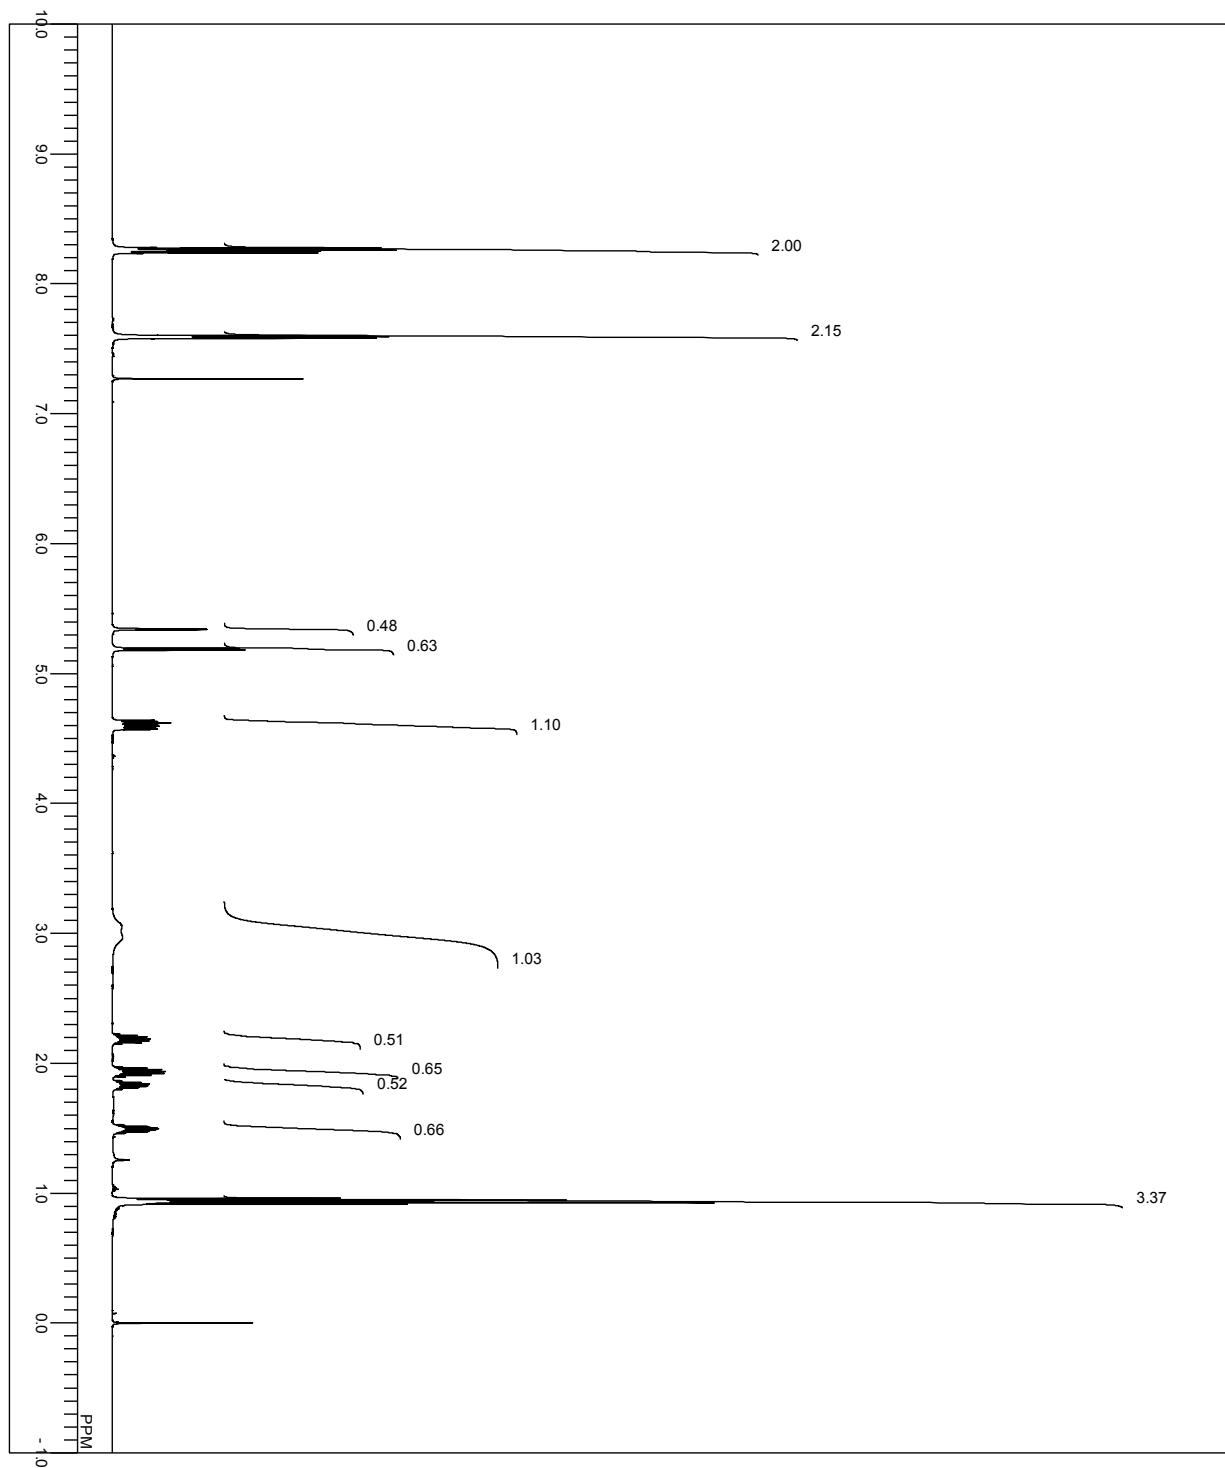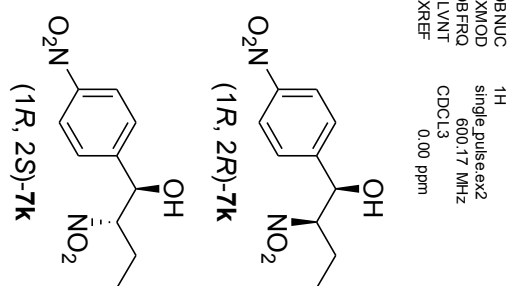

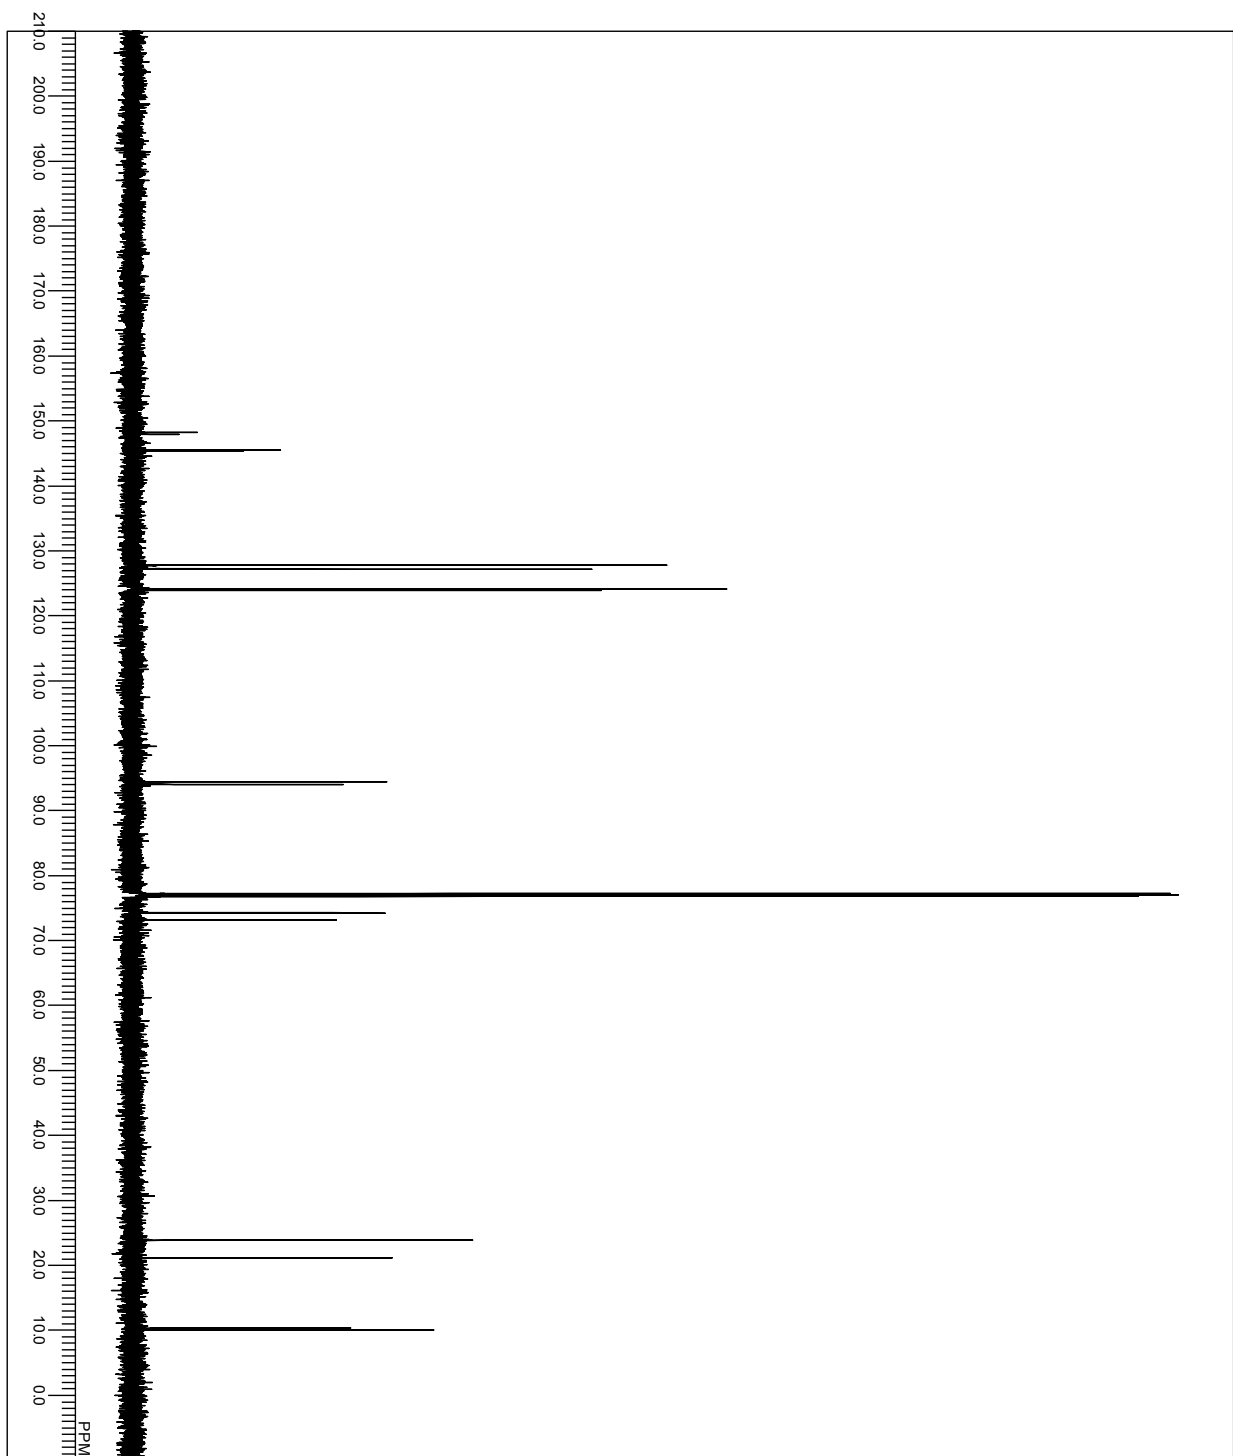

OBNUC 13C  
EXMOD single-pulse dec  
OBFRQ 150.92 MHz  
SLVNT CDCl<sub>3</sub>  
EXREF 77.00 ppm

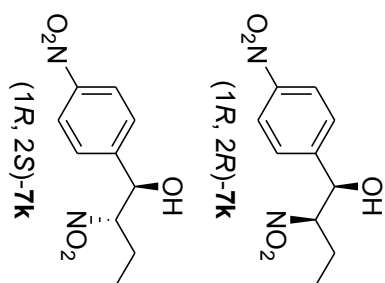

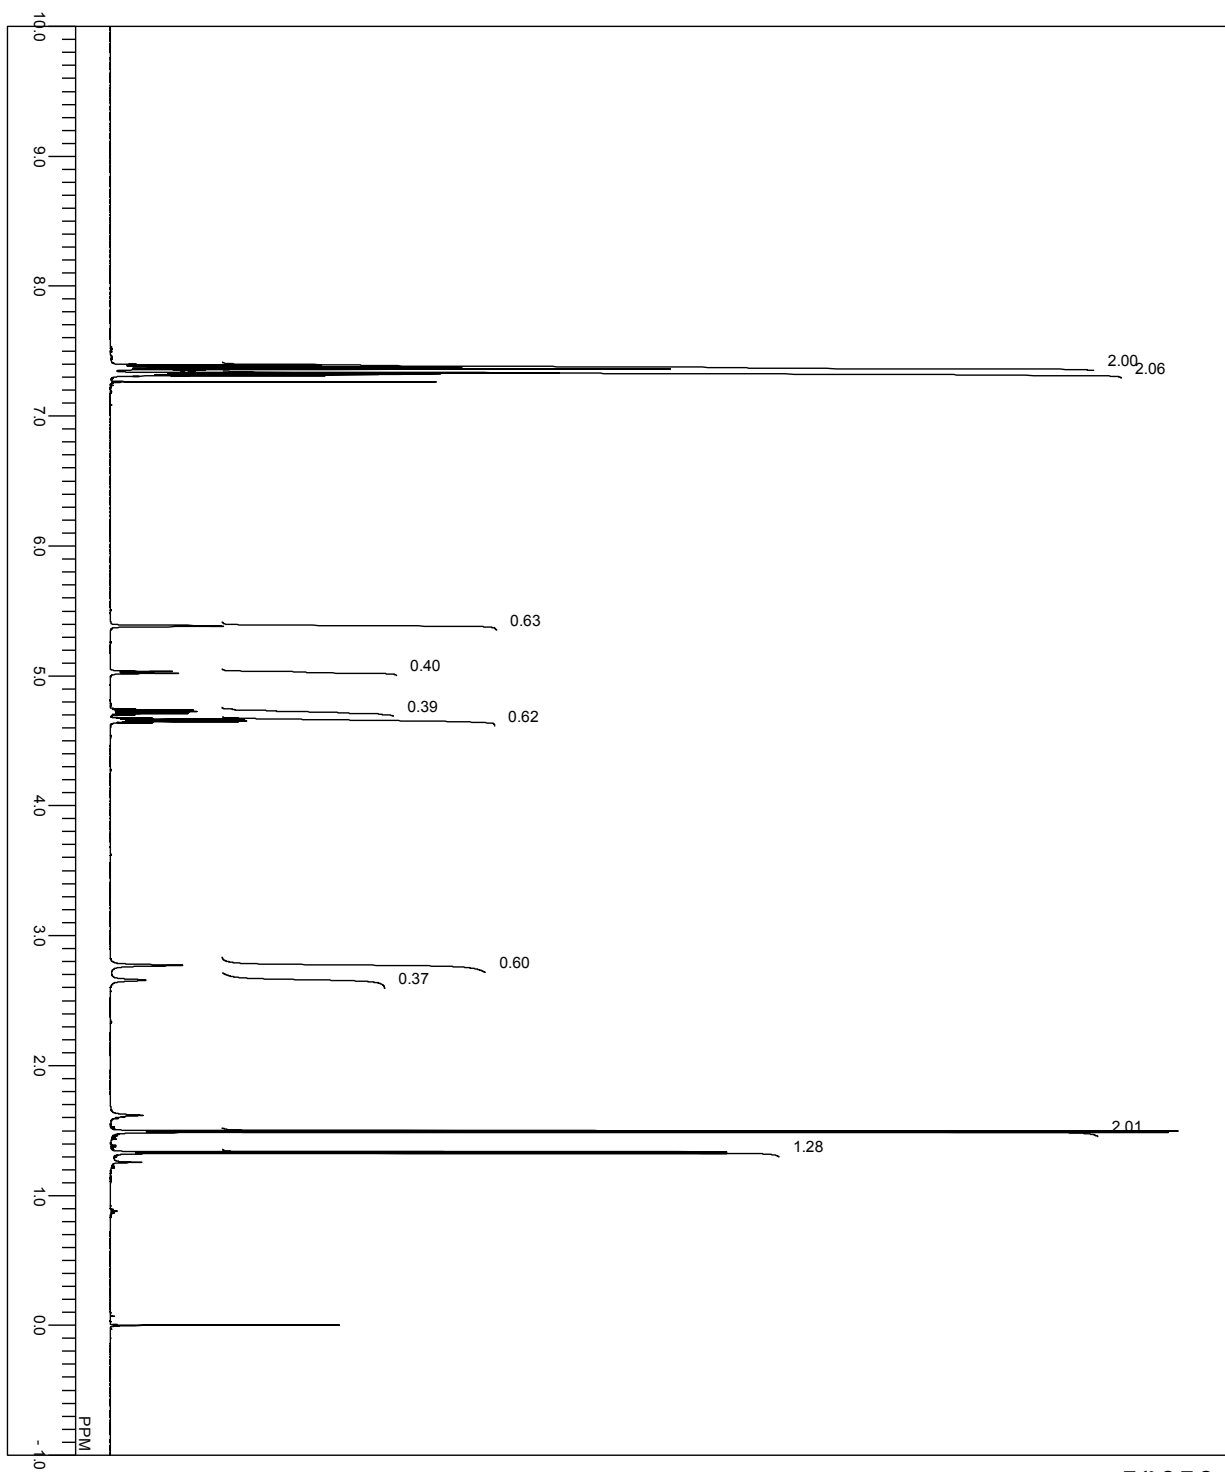

OBNUC  
EXMOD  
OBFRQ  
SLVNT  
EXREF

<sup>1</sup>H  
single.pulse.e2  
600.17 MHz  
CDCL3  
0.00 ppm

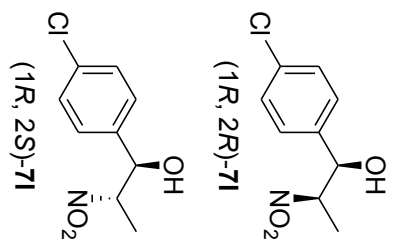



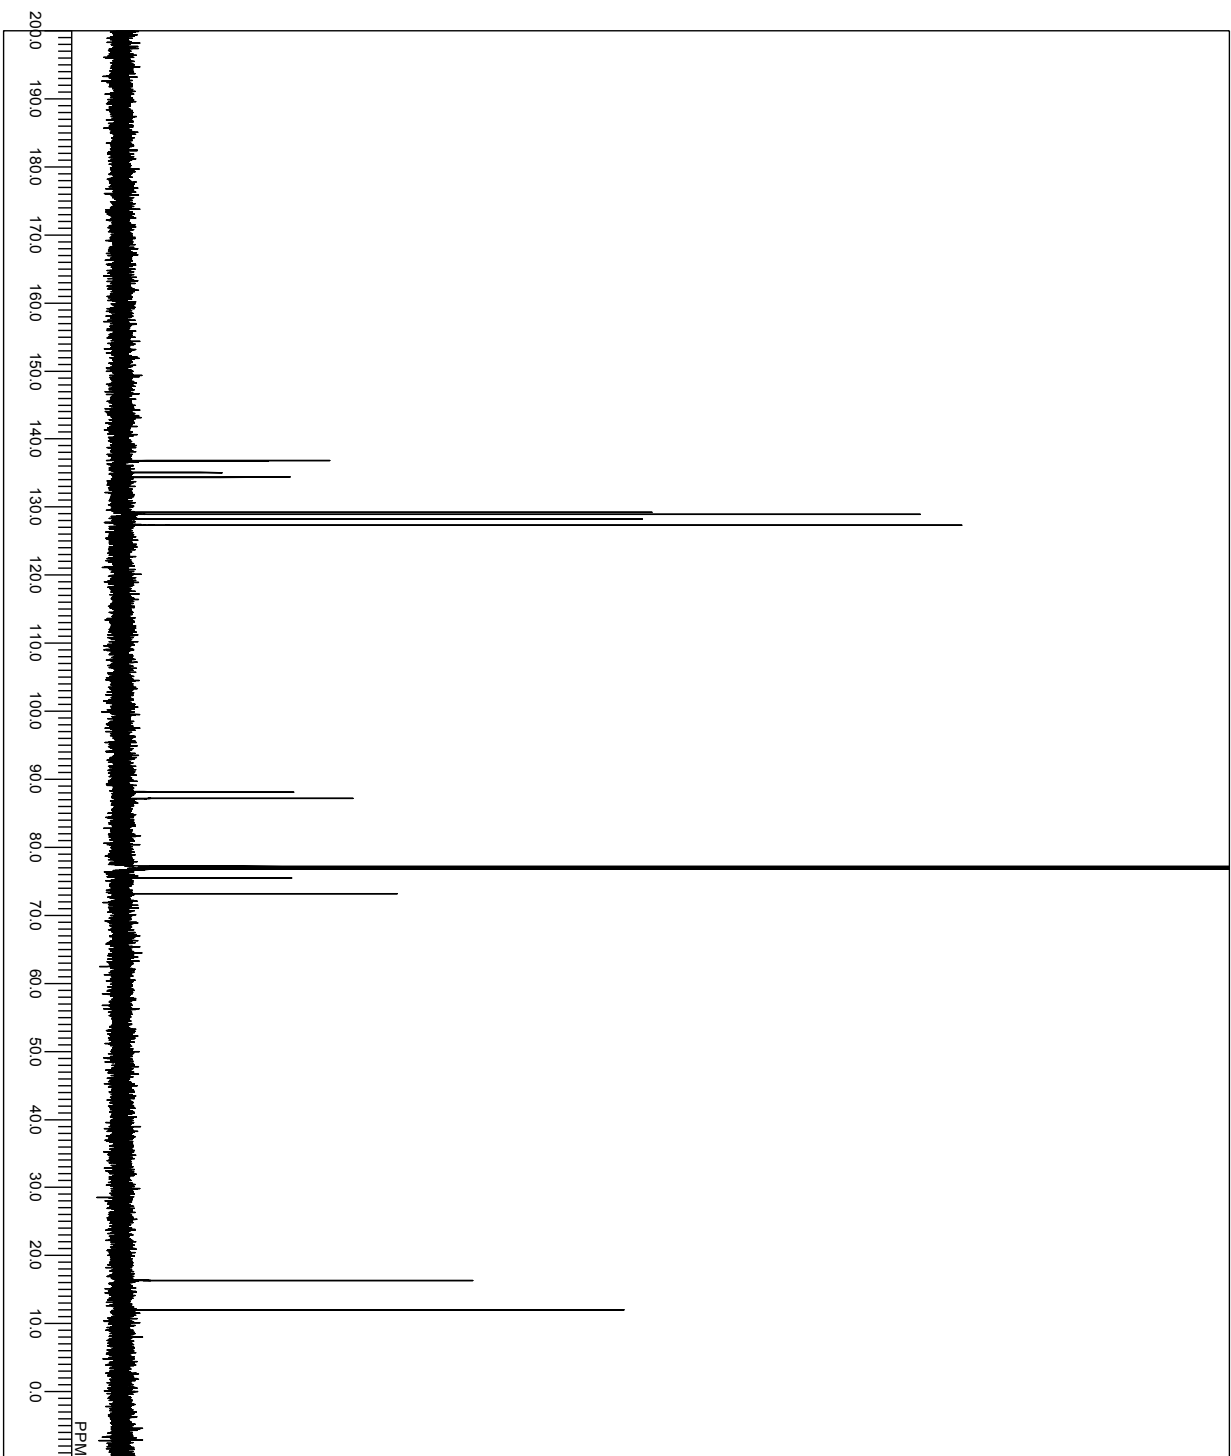

ORNUC <sup>13</sup>C  
EXMOD single pulse qec  
OBFRQ 150.92 MHz  
SOLVENT CDCL<sub>3</sub>  
EXREF 77.00 ppm

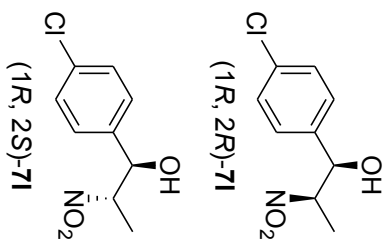

CHROMATOPAC C-R7A CH=1 REPORT No.=7

7071=1:@CHRM1.C00

11/11/26 20:19:28

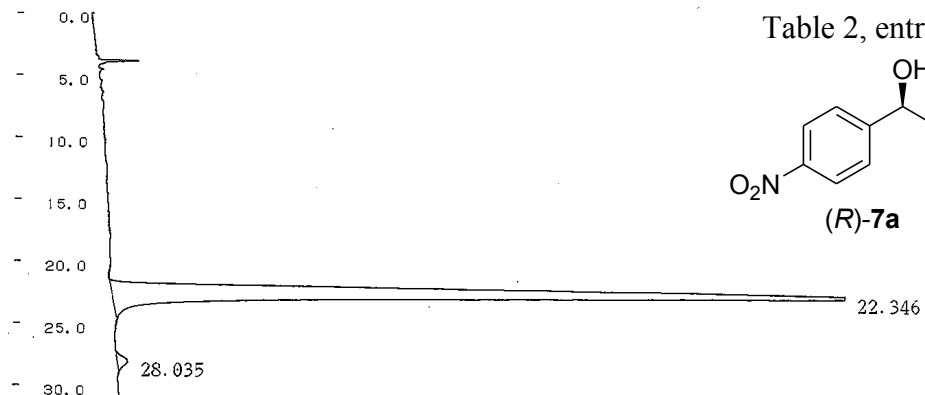

Table 2, entry 1

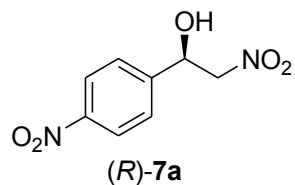

\*\* 定量計算結果 \*\*

| CH    | PKNO | TIME   | AREA    | HEIGHT | MK | IDNO | CONC    | NAME |
|-------|------|--------|---------|--------|----|------|---------|------|
| 1     | 1    | 22.346 | 1671661 | 34066  |    |      | 98.6488 |      |
|       | 2    | 28.035 | 22897   | 441    |    |      | 1.3512  |      |
| TOTAL |      |        | 1694558 | 34508  |    |      | 100     |      |

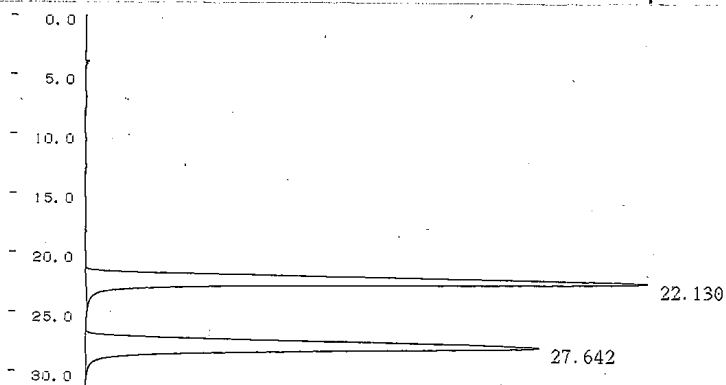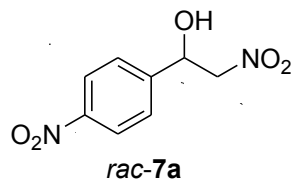

\*\* 定量計算結果 \*\*

| CH    | PKNO | TIME   | AREA    | HEIGHT | MK | IDNO | CONC    | NAME |
|-------|------|--------|---------|--------|----|------|---------|------|
| 1     | 1    | 22.13  | 2209338 | 47453  |    |      | 50.1937 |      |
|       | 2    | 27.642 | 2192286 | 38346  |    |      | 49.8063 |      |
| TOTAL |      |        | 4401624 | 85799  |    |      | 100     |      |

CHROMATOPAC C-R7A CH=1 REPORT No.=5 7071=1:CHRM1.C00 12/09/07 17:03:28

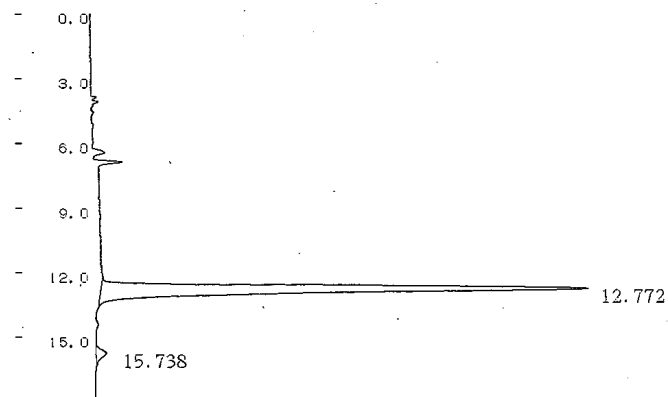

Table 2, entry 2

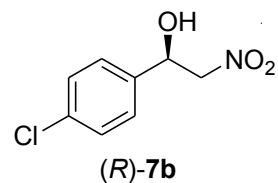

\*\* 定量計算結果 \*\*

| CH    | PKNO | TIME   | AREA   | HEIGHT | MK | IDNO | CONC   | NAME |
|-------|------|--------|--------|--------|----|------|--------|------|
| 1     | 1    | 12.772 | 227098 | 10280  |    |      | 97.615 |      |
|       | 2    | 15.738 | 5549   | 212    |    |      | 2.385  |      |
| TOTAL |      |        | 232647 | 10492  |    |      | 100    |      |

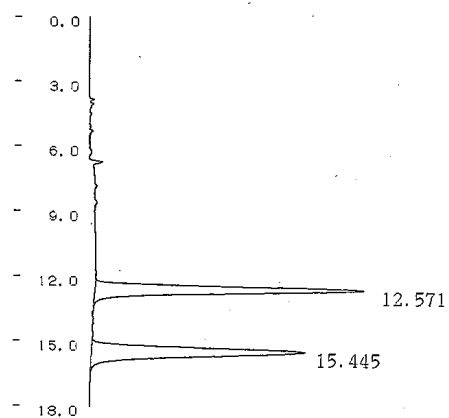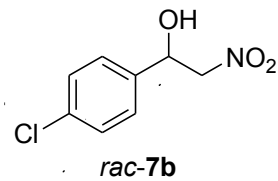

\*\* 定量計算結果 \*\*

| CH | PKNO | TIME   | AREA   | HEIGHT | MK | IDNO | CONC    | NAME |
|----|------|--------|--------|--------|----|------|---------|------|
| 1  | 1    | 12.571 | 247154 | 11412  |    |      | 49.9734 |      |
|    | 2    | 15.445 | 247417 | 9074   |    |      | 50.0266 |      |

r2-1

CHROMATOPAC C-R7A CH=1 REPORT No.=8 カロト=1:CHRM1.C00 12/03/19 11:22:04

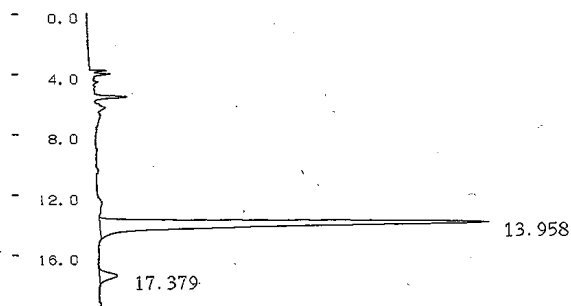

Table 2, entry 3

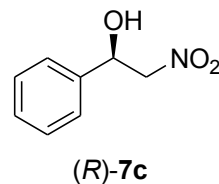

**\*\* 定量計算結果 \*\***

| CH    | PKNO | TIME   | AREA   | HEIGHT | MK | IDNO | CONC    | NAME |
|-------|------|--------|--------|--------|----|------|---------|------|
| 1     | 1    | 13.958 | 105881 | 4097   |    |      | 95.0177 |      |
|       | 2    | 17.379 | 5552   | 189    |    |      | 4.9823  |      |
| TOTAL |      |        | 111433 | 4286   |    |      | 100     |      |

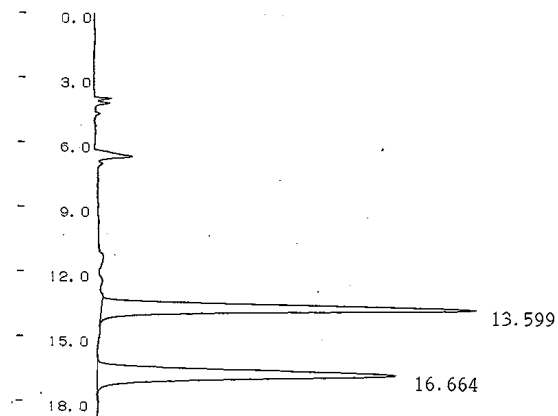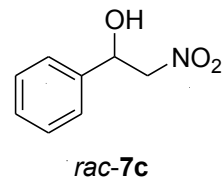

**\*\* 定量計算結果 \*\***

| CH    | PKNO | TIME   | AREA   | HEIGHT | MK | IDNO | CONC    | NAME |
|-------|------|--------|--------|--------|----|------|---------|------|
| 1     | 1    | 13.599 | 90301  | 3960   |    |      | 50.2958 |      |
|       | 2    | 16.664 | 89238  | 3167   |    |      | 49.7042 |      |
| TOTAL |      |        | 179539 | 7126   |    |      | 100     |      |

CHROMATOPAC C-R7A CH= REPORT No.=2 7071=1:@CHRM1.C00 12/05/23 13:36:16

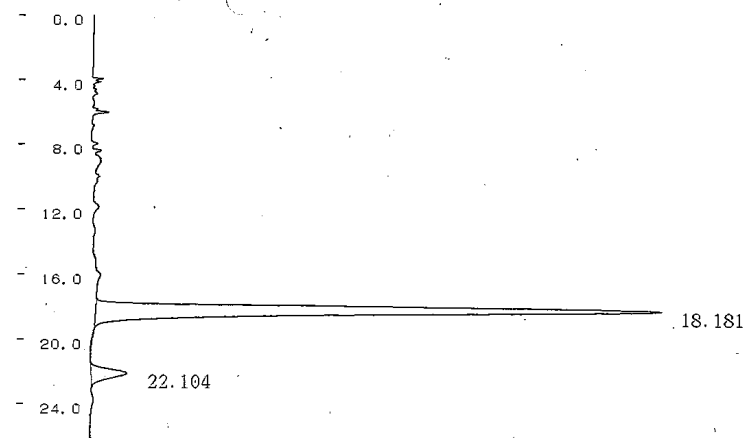

Table 2, entry 4

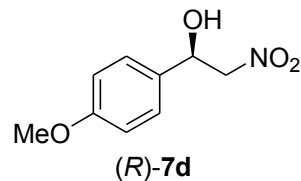

\*\* 定量計算結果 \*\*

| CH    | PKNO | TIME   | AREA   | HEIGHT | MK | IDNO | CONC    | NAME |
|-------|------|--------|--------|--------|----|------|---------|------|
| 1     | 1    | 18.181 | 390023 | 11928  |    |      | 92.9701 |      |
|       | 2    | 22.104 | 29492  | 764    |    |      | 7.0299  |      |
| TOTAL |      |        | 419514 | 12692  |    |      | 100     |      |

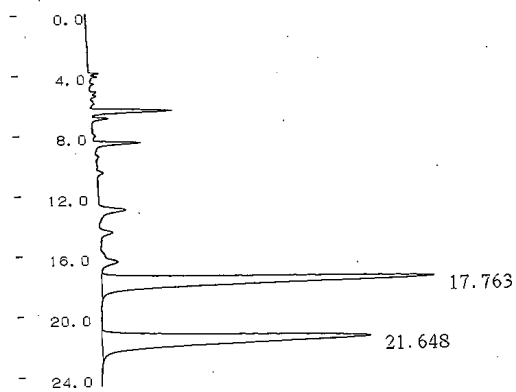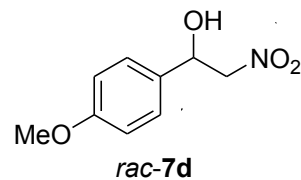

\*\* 定量計算結果 \*\*

| CH    | PKNO | TIME   | AREA   | HEIGHT | MK | IDNO | CONC    | NAME |
|-------|------|--------|--------|--------|----|------|---------|------|
| 1     | 1    | 17.763 | 224143 | 7029   |    |      | 49.9986 |      |
|       | 2    | 21.648 | 224155 | 5697   |    |      | 50.0014 |      |
| TOTAL |      |        | 448298 | 12726  |    |      | 100     |      |

-2-

CHROMATOPAC C-R7A CH=1 REPORT No.=5 7071=1:CHRM1.C00 12/09/20 16:44:30

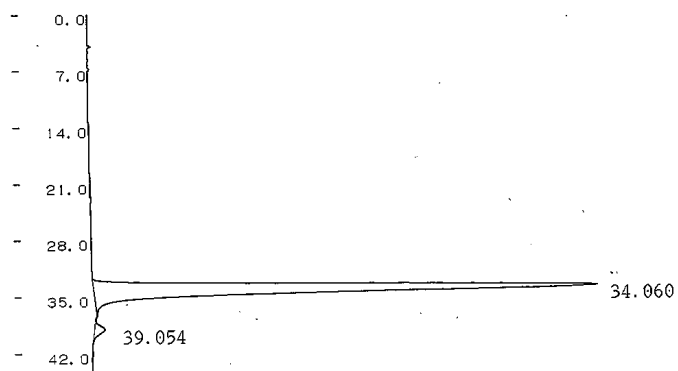

Table 2, entry 5

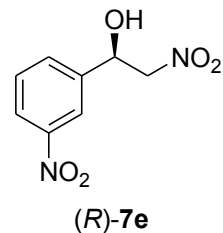

\*\* 定量計算結果 \*\*

| CH    | PKNO | TIME   | AREA    | HEIGHT | MK | IDNO | CONC    | NAME |
|-------|------|--------|---------|--------|----|------|---------|------|
| 1     | 5    | 34.06  | 1482257 | 21276  |    |      | 98.0089 |      |
|       | 6    | 39.054 | 30112   | 430    |    |      | 1.9911  |      |
| TOTAL |      |        | 1512369 | 21705  |    |      | 100     |      |

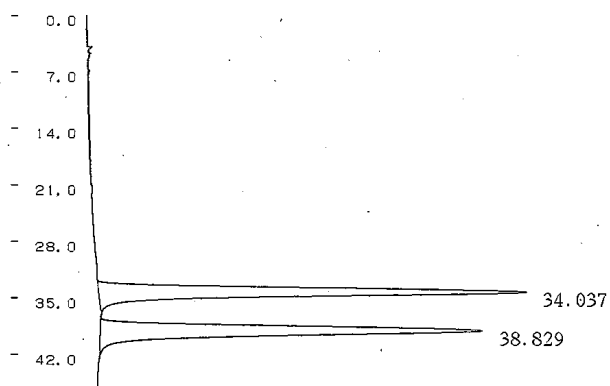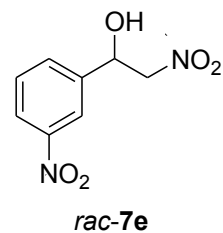

\*\* 定量計算結果 \*\*

| CH    | PKNO | TIME   | AREA    | HEIGHT | MK | IDNO | CONC   | NAME |
|-------|------|--------|---------|--------|----|------|--------|------|
| 1     | 1    | 34.037 | 1261274 | 18130  |    |      | 50.118 |      |
|       | 2    | 38.829 | 1255336 | 16174  |    |      | 49.882 |      |
| TOTAL |      |        | 2516609 | 34305  |    |      | 100    |      |

-2-

CHROMATOPAC C-R7A CH=1 REPORT No.=5 知7ト=1:CHRM1.C00 12/08/27 14:12:56

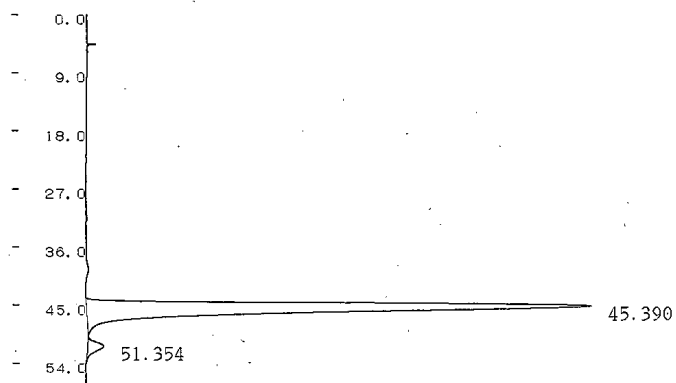

Table 2, entry 6

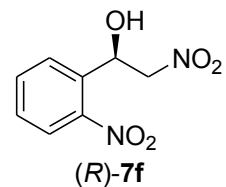

\*\* 定量計算結果 \*\*

| CH    | PKNO | TIME   | AREA    | HEIGHT | MK | IDNO | CONC    | NAME |
|-------|------|--------|---------|--------|----|------|---------|------|
| 1     | 1    | 45.39  | 2007337 | 21337  |    |      | 96.9196 |      |
|       | 2    | 51.354 | 63799   | 685    |    |      | 3.0804  |      |
| TOTAL |      |        | 2071137 | 22022  |    |      | 100     |      |

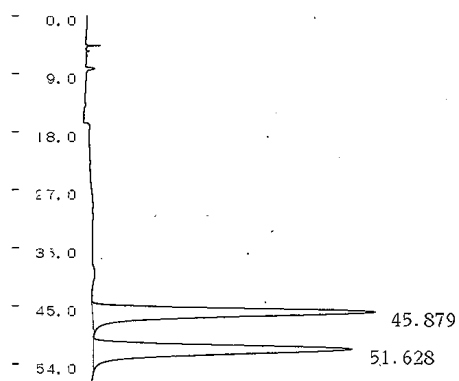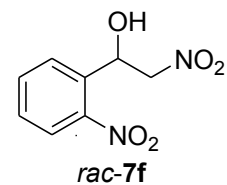

\*\* 定量計算結果 \*\*

| CH    | PKNO | TIME   | AREA    | HEIGHT | MK | IDNO | CONC    | NAME |
|-------|------|--------|---------|--------|----|------|---------|------|
| 1     | 1    | 45.879 | 532551  | 5997   |    |      | 50.1968 |      |
|       | 2    | 51.628 | 528375  | 5476   |    |      | 49.8032 |      |
| TOTAL |      |        | 1060925 | 11473  |    |      | 100     |      |

CHROMATOPAC C-R7A CH=1 REPORT No.=11 7071=1:CHRM1.C00 12/06/28 18:39:26

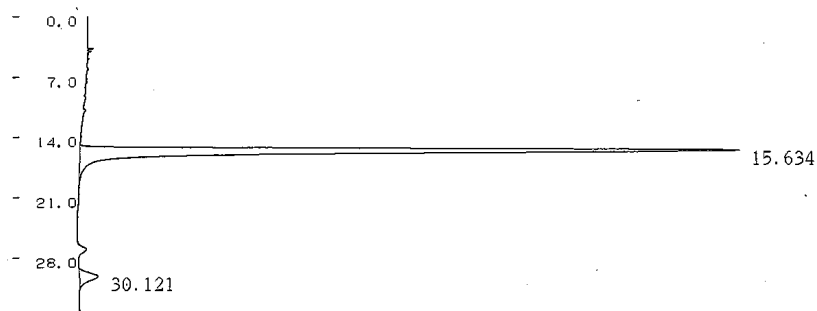

Table 2, entry 7

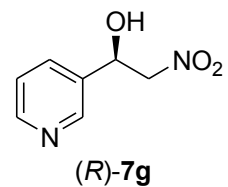

\*\* 定量計算結果 \*\*

| CH    | PKNO | TIME   | AREA   | HEIGHT | MK | IDNO | CONC    | NAME |
|-------|------|--------|--------|--------|----|------|---------|------|
| 1     | 1    | 15.634 | 541615 | 13929  |    |      | 95.5804 |      |
|       | 2    | 30.121 | 25044  | 395    |    |      | 4.4196  |      |
| TOTAL |      |        | 566659 | 14325  |    |      | 100     |      |

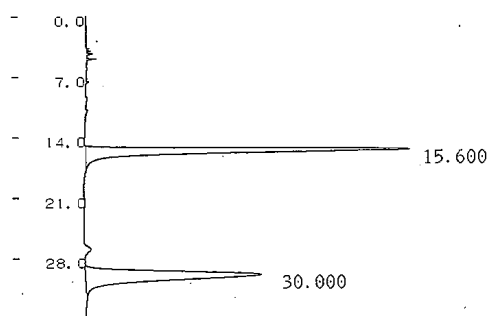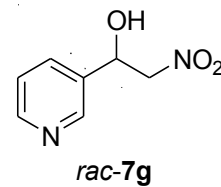

\*\* 定量計算結果 \*\*

| CH    | PKNO | TIME | AREA    | HEIGHT | MK | IDNO | CONC    | NAME |
|-------|------|------|---------|--------|----|------|---------|------|
| 1     | 1    | 15.6 | 514455  | 13687  | S  |      | 50.2417 |      |
|       | 3    | 30   | 509504  | 7488   |    |      | 49.7582 |      |
| TOTAL |      |      | 1023959 | 21175  |    |      | 100     |      |



CHROMATOPAC C-R7A CH=1 REPORT No.=4 7071=1:@CHRM1.C00 12/08/29 16:30:48

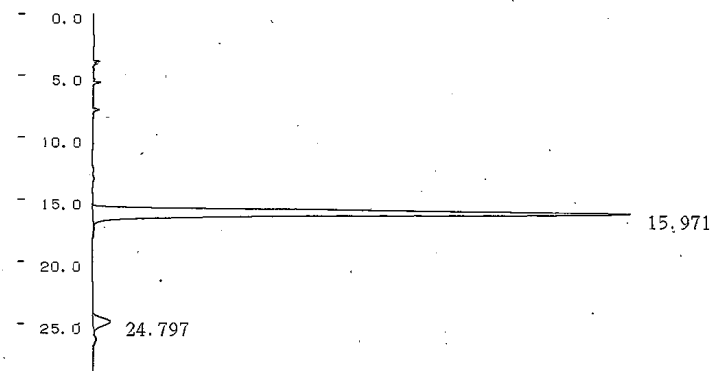

Table 2, entry 8

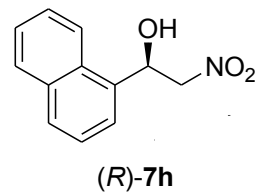

\*\* 定量計算結果 \*\*

| CH    | PKNO | TIME   | AREA   | HEIGHT | MK | IDNO | CONC    | NAME |
|-------|------|--------|--------|--------|----|------|---------|------|
| 1     | 1    | 15.971 | 684250 | 22669  |    |      | 95.4764 |      |
|       | 2    | 24.797 | 32419  | 733    |    |      | 4.5236  |      |
| TOTAL |      |        | 716669 | 23402  |    |      | 100     |      |

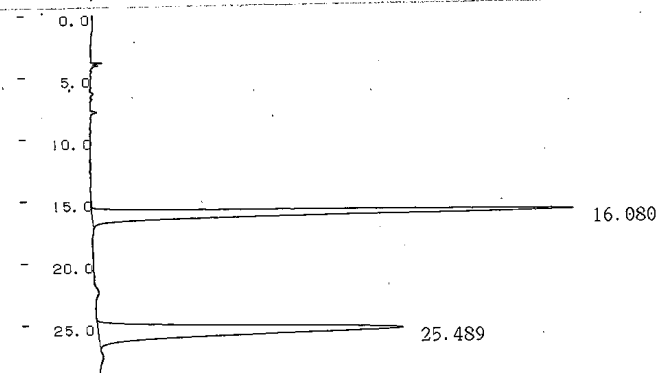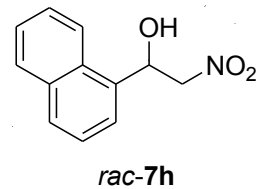

\*\* 定量計算結果 \*\*

| CH    | PKNO | TIME   | AREA   | HEIGHT | MK | IDNO | CONC    | NAME |
|-------|------|--------|--------|--------|----|------|---------|------|
| 1     | 1    | 16.08  | 310433 | 10188  |    |      | 50.0817 |      |
|       | 2    | 25.489 | 309420 | 6471   |    |      | 49.9183 |      |
| TOTAL |      |        | 619853 | 16659  |    |      | 100     |      |

CHROMATOPAC C-R7A CH=1 REPORT No.=4 7071=1:CHRM1.C00 13/03/07 19:30:14

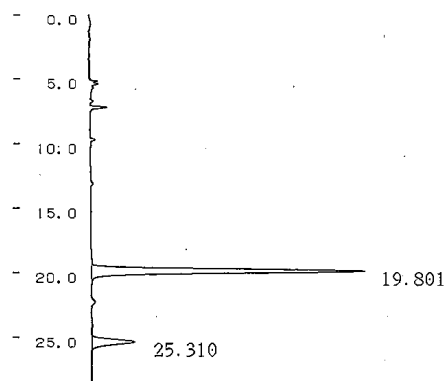

Table 2, entry 9

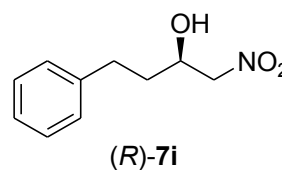

\*\* 定量計算結果 \*\*

| CH    | PKNO | TIME   | AREA   | HEIGHT | MK | IDNO | CONC    | NAME |
|-------|------|--------|--------|--------|----|------|---------|------|
| 1     | 1    | 19.801 | 131220 | 5777   |    |      | 83.8961 |      |
|       | 2    | 25.31  | 25188  | 912    |    |      | 16.1039 |      |
| TOTAL |      |        | 156408 | 6689   |    |      | 100     |      |

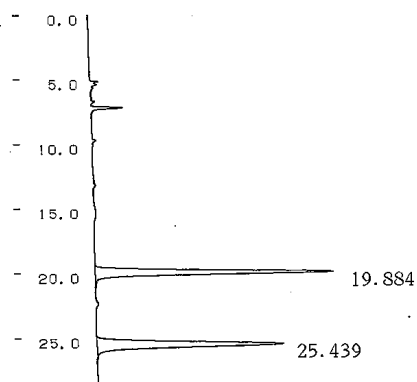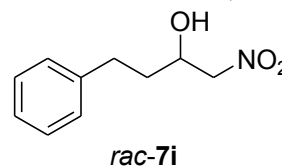

\*\* 定量計算結果 \*\*

| CH    | PKNO | TIME   | AREA   | HEIGHT | MK | IDNO | CONC    | NAME |
|-------|------|--------|--------|--------|----|------|---------|------|
| 1     | 1    | 19.884 | 115492 | 5052   |    |      | 50.1569 |      |
|       | 2    | 25.439 | 114770 | 3977   |    |      | 49.8431 |      |
| TOTAL |      |        | 230261 | 9029   |    |      | 100     |      |

CHROMATOPAC C-R7A CH=1 REPORT No.=9 7071=1:CHRM1.C00 12/04/23 19:25:42

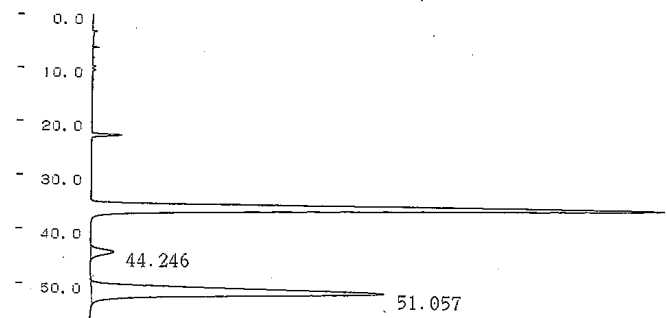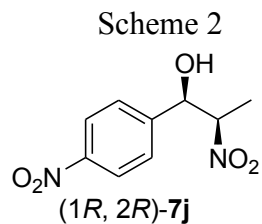

\*\* 定量計算結果 \*\*

| CH    | PKNO | TIME   | AREA    | HEIGHT | MK | IDNO | CONC    | NAME |
|-------|------|--------|---------|--------|----|------|---------|------|
| 1     | 1    | 44.246 | 69194   | 966    |    |      | 5.7154  |      |
|       | 2    | 51.057 | 1141460 | 12360  |    |      | 94.2846 |      |
| TOTAL |      |        | 1210655 | 13326  |    |      | 100     |      |

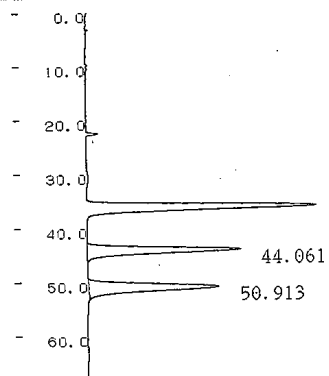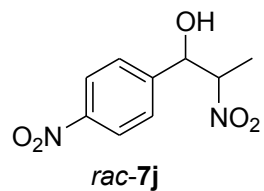

\*\* 定量計算結果 \*\*

| CH    | PKNO | TIME   | AREA   | HEIGHT | MK | IDNO | CONC    | NAME |
|-------|------|--------|--------|--------|----|------|---------|------|
| 1     | 1    | 44.061 | 489433 | 6541   |    |      | 49.6133 |      |
|       | 2    | 50.913 | 497061 | 5550   |    |      | 50.3867 |      |
| TOTAL |      |        | 986494 | 12092  |    |      | 100     |      |

CHROMATOPAC C-R7A CH=1 REPORT No.=9 7071=1:@CHRM1.C00 12/04/23 13:05:46

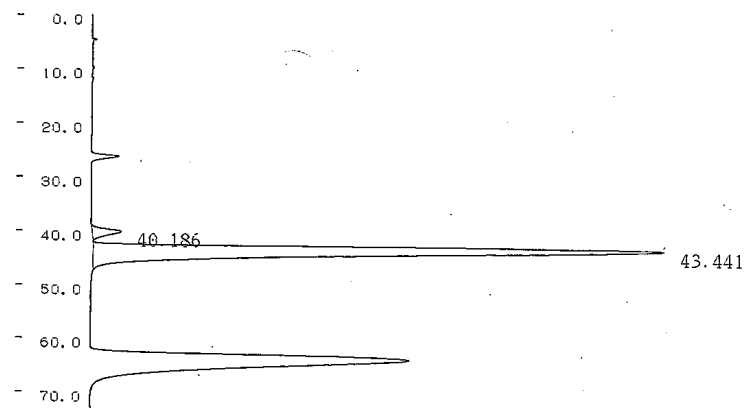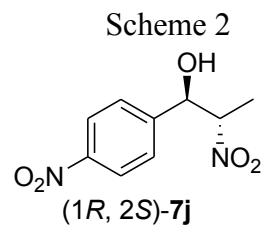

\*\* 定量計算結果 \*\*

| CH    | PKNO | TIME   | AREA    | HEIGHT | MK | IDNO | CONC    | NAME |
|-------|------|--------|---------|--------|----|------|---------|------|
| 1     | 1    | 40.186 | 95637   | 1242   |    |      | 3.6061  |      |
|       | 2    | 43.441 | 2556466 | 24098  |    |      | 96.3939 |      |
| TOTAL |      |        | 2652103 | 25340  |    |      | 100     |      |

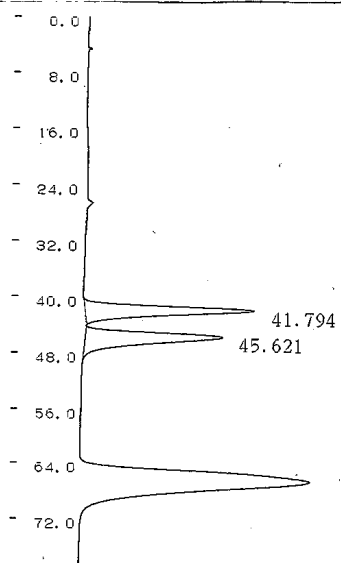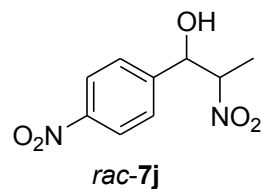

\*\* 定量計算結果 \*\*

| CH    | PKNO | TIME   | AREA    | HEIGHT | MK | IDNO | CONC    | NAME |
|-------|------|--------|---------|--------|----|------|---------|------|
| 1     | 1    | 41.794 | 605919  | 7211   |    |      | 50.2268 |      |
|       | 2    | 45.621 | 600446  | 5863   |    |      | 49.7732 |      |
| TOTAL |      |        | 1206364 | 13074  |    |      | 100     |      |

CHROMATOPAC C-R7A CH=1 REPORT No.=11 7071=1:CHRM1.C00 13/03/02 19:49:44

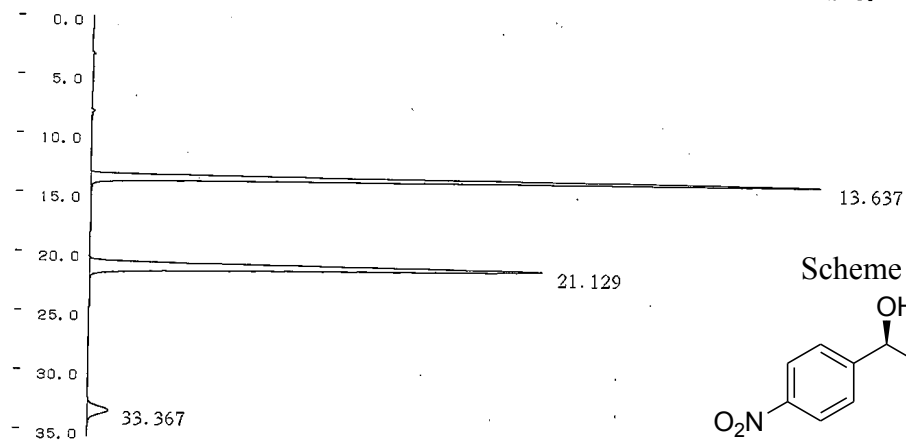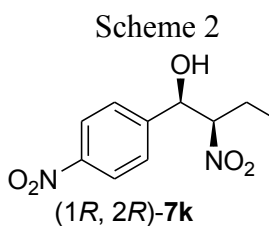

\*\* 定量計算結果 \*\*

| CH    | PKNO | TIME   | AREA    | HEIGHT | MK | IDNO | CONC    | NAME |
|-------|------|--------|---------|--------|----|------|---------|------|
| 1     | 1    | 13.637 | 1167494 | 61871  |    |      | 49.3913 |      |
|       | 2    | 21.129 | 1116699 | 38284  |    |      | 47.2424 |      |
|       | 3    | 33.367 | 79574   | 1748   |    |      | 3.3664  |      |
| TOTAL |      |        | 2363766 | 101903 |    |      | 100     |      |

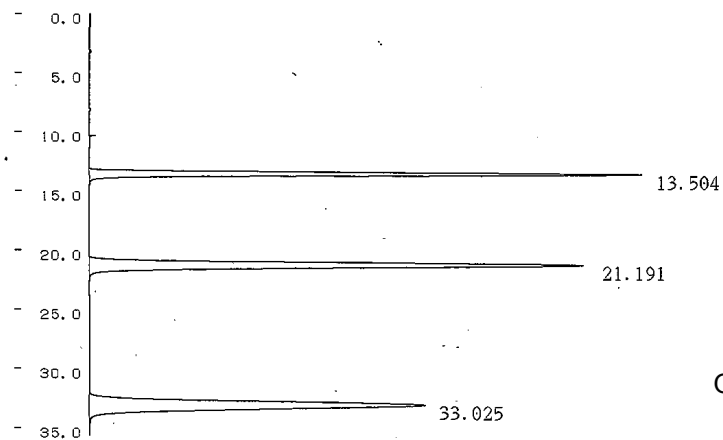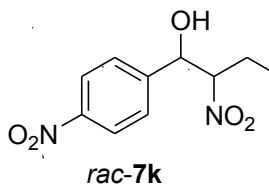

\*\* 定量計算結果 \*\*

| CH    | PKNO | TIME   | AREA    | HEIGHT | MK | IDNO | CONC    | NAME |
|-------|------|--------|---------|--------|----|------|---------|------|
| 1     | 1    | 13.504 | 917997  | 46860  |    |      | 26.5571 |      |
|       | 2    | 21.191 | 1280205 | 41864  |    |      | 37.0356 |      |
|       | 3    | 33.025 | 1258488 | 28503  |    |      | 36.4073 |      |
| TOTAL |      |        | 3456690 | 117227 |    |      | 100     |      |

-1-

CHROMATOPAC C-R7A CH=1 REPORT No.=5 7071=1:CHRM1.C00 13/03/02 18:05:46

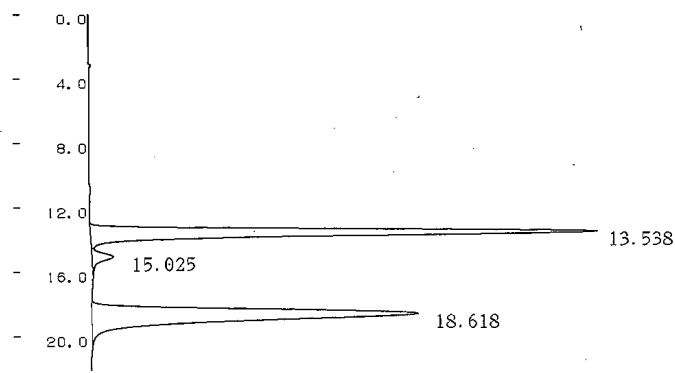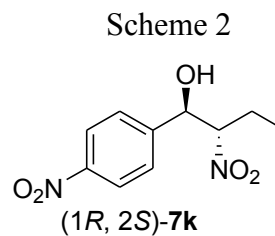

\*\* 定量計算結果 \*\*

| CH    | PKNO | TIME   | AREA    | HEIGHT | MK | IDNO | CONC    | NAME |
|-------|------|--------|---------|--------|----|------|---------|------|
| 1     | 1    | 13.538 | 1255741 | 42926  |    |      | 47.9412 |      |
|       | 2    | 15.025 | 61170   | 1797   | V  |      | 2.3353  |      |
|       | 3    | 18.618 | 1302423 | 27653  | S  |      | 49.7234 |      |
| TOTAL |      |        | 2619334 | 72377  |    |      | 100     |      |

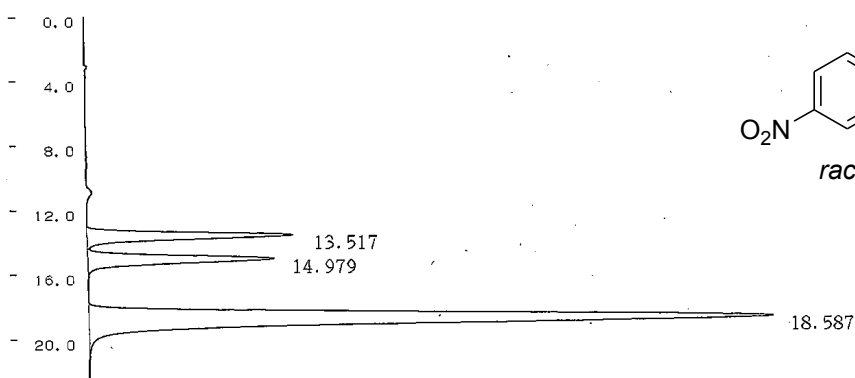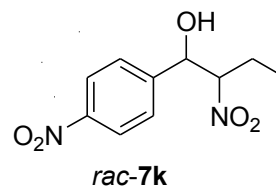

\*\* 定量計算結果 \*\*

| CH    | PKNO | TIME   | AREA    | HEIGHT | MK | IDNO | CONC    | NAME |
|-------|------|--------|---------|--------|----|------|---------|------|
| 1     | 1    | 13.517 | 513020  | 17484  |    |      | 13.7577 |      |
|       | 2    | 14.979 | 517785  | 15875  | V  |      | 13.8855 |      |
|       | 3    | 18.587 | 2698165 | 58034  | S  |      | 72.3568 |      |
| TOTAL |      |        | 3728970 | 91392  |    |      | 100     |      |

r2-1

-3-

CHROMATOPAC C-R7A CH=1 REPORT No.=9

ファイル名: @CHRM1.C00 12/05/15 18:22:36

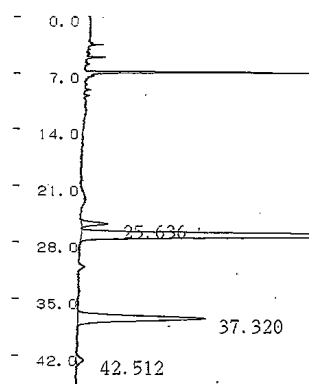

Scheme 2

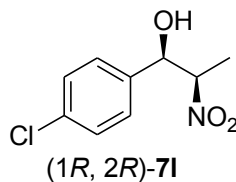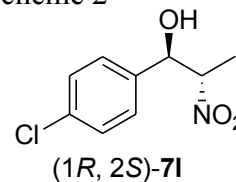

\*\* 定量計算結果 \*\*

| CH    | PKNO | TIME   | AREA   | HEIGHT | MK | IDNO | CONC    | NAME |
|-------|------|--------|--------|--------|----|------|---------|------|
| 1     | 1    | 25.636 | 3882   | 140    |    |      | 3.3012  |      |
|       | 2    | 26.972 | 83287  | 2674   |    |      | 70.8179 |      |
|       | 3    | 37.32  | 28805  | 681    |    |      | 24.4928 |      |
|       | 4    | 42.512 | 1633   | 40     |    |      | 1.3881  |      |
| TOTAL |      |        | 117607 | 3536   |    |      | 100     |      |

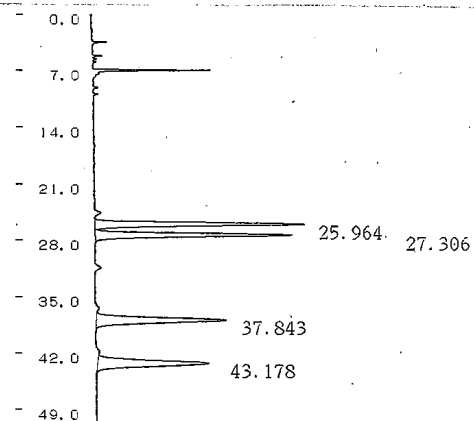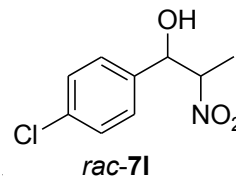

\*\* 定量計算結果 \*\*

| CH    | PKNO | TIME   | AREA   | HEIGHT | MK | IDNO | CONC    | NAME |
|-------|------|--------|--------|--------|----|------|---------|------|
| 1     | 1    | 25.964 | 66904  | 2220   |    |      | 26.6168 |      |
|       | 2    | 27.306 | 65992  | 2086   | V  |      | 26.254  |      |
|       | 3    | 37.843 | 59633  | 1382   |    |      | 23.7244 |      |
|       | 4    | 43.178 | 58830  | 1189   |    |      | 23.4048 |      |
| TOTAL |      |        | 251359 | 6876   |    |      | 100     |      |
